# Supplementary material for: Cattle feces are a reservoir of diverse Acinetobacter species with potential to spread antibiotic resistance genes
Source: Research Square preprint supplement (doi:10.21203/rs.3.rs-8343889/v1), 2026-02-03
Supplement: Supplementary file 2 [file 34412e070fa55a435455ba83.xlsx]

## Sheet: Table S1
Table S1	Overview of the Czech cattle farms included in the study. Farms from which we sampled both 'floor' and individual 'cow' samples are labeled with an asterisk. The values in individual antibiotic columns represent totals administrated per farm over a period of 6 months prior to sampling date. 'Total antibiotics used on farm (g)' is the sum of all antibiotics used on a farm from this period. 'Per he…
Farm code	Location (Region)	Sampling date	Main production type	Main breed	Cattle diet	Stabling	Herd size	Total antibiotics used on farm (g)	On-farm antibiotic use category	Per head antibiotic use (g)	Benzylpenicillin (g)	Cefalonium (g)	Cefapirin (g)	Ceftiofur (g)	Gentamicin (g)	Chlortetracycline (g)	Procaine benzylpenicillin (g)	Amoxicillin (g)	Cloxacillin (g)	Cefquinome (g)	Marbofloxacin (g)	Oxytetracycline (g)	Dihydrostreptomycin (g)	Enrofloxacin (g)	Florfenicol (g)	Neomycin (g)	Novobiocin (g)	Tulathromycin (g)	Cefacetrile (g)	Lincomycin (g)	Rifaximin (g)	Sulfadoxine (g)	Trimethoprim (g)	Tetracycline (g)	Bacitracin (g)	Cefoperazone (g)	Ampicillin (g)	Cefalexin (g)	Dicloxacillin (g)	Monensin (g)	Tylosin (g)	Nafcillin (g)	Sulfadiazine (g)
F01	Central Bohemia	2022-09	Dairy	Holstein	Corn, grass silage, corn cob mix, beet pulp, molasses, brewer’s grains, straw, fats, meals, soybean, mineral supplements.	Indoor	640	10146	High use	15.8531	0	0	6.2	572.2	0	0	2364.3	640.4	0	164.225	703.5	58.8	2775.38	0	0	71.7642	9.3	0	0.6	195.36	124.2	77.6	15.52	1422.18	0	0	25.6	23	25.6	356.4	514.12	0	0
F02	Ústí nad Labem	2022-07	Beef	Aberdeen angus	Grass silage, hay; calves supplemented with rolled grain.	Indoor/Outdoor	5	0	No use	0	0	0	0	0	0	0	0	0	0	0	0	0	0	0	0	0	0	0	0	0	0	0	0	0	0	0	0	0	0	0	0	0	0
F03*	Central Bohemia	2022-07	Dairy	Cestr	Total mixed ration - maize silage, grass silage, rapeseed meal, wheat, barley, hay, straw, Schaumann feed supplements.	Indoor/Outdoor	220	35	Low use	0.159091	0	0	0	0	0	0	15.6	0	0	0	0	0	19.5	0	0	0	0	0	0	0	0	0	0	0	0	0	0	0	0	0	0	0	0
F04*	Central Bohemia	2022-04	Beef	Charolais	Pasture, hay, salt lick.	Outdoor	15	0	No use	0	0	0	0	0	0	0	0	0	0	0	0	0	0	0	0	0	0	0	0	0	0	0	0	0	0	0	0	0	0	0	0	0	0
F05*	Central Bohemia	2022-06	Dairy	Cestr/Montbeliard	Silage, grass silage, hay, grain, rapeseed meal, molasses.	Indoor	160	256	Moderate use	1.6	0	0	1.5	125	0	0	25.6755	1	0	12.5	7.5	50	31.3	0	0	0.6755	0.5	0	0	0	0	0	0	0	0	0	0	0	0	0	0	0	0
F06	Central Bohemia	2022-08	Dairy	Cestr	Maize, alfalfa, clover + mixture (wheat, barley, soybean meals, extracted and extruded meals, corn cob mix).	Indoor	800	3710	High use	4.6375	0	0	0	843.6	0	0	2480.2	187.6	0	116.25	8.4	0	31.25	0	0	10	0	0	0	33	0	0	0	0	0	0	0	0	0	0	0	0	0
F07	Central Bohemia	2022-10	Dairy	Holstein	Maize silage, rapeseed, concentrate mixture.	Indoor	1130	51	Low use	0.0451327	0	0	0	6.4	0	0	26.98	3.75	0	0.525	2	0	0.4	0	0	0	0	0	0	0	0	0	0	0	0	0	0	0	0	10.368	0	0.4	0
F08	Central Bohemia	2022-10	Dairy	Holstein	Maize silage, alfalfa silage, rye, wheat straw, molasses, sugar-beet pulp, brewer’s grains, extracted rapeseed and sunflower meal, sodium bicarbonate.	Indoor	150	448	Moderate use	2.98667	0	0	0	193.5	0	0	0	197.5	13.1695	1.125	0	0	0	0	0	5.8	0	1.9	5.6	19.4	10	0	0	0	0	0	0	0	0	0	0	0	0
F09*	Central Bohemia	2022-04	Beef	Hereford	Hay, grass silage, concentrate mixture.	Indoor/Outdoor	100	27	Low use	0.27	0	0	0	0	0	0	0	0	0	0	0	27	0	0	0	0	0	0	0	0	0	0	0	0	0	0	0	0	0	0	0	0	0
F10	Central Bohemia	2022-08	Dairy	Cestr/Limousin	Pasture, clover-grass silages, concentrate mixture.	Outdoor	56	0	No use	0	0	0	0	0	0	0	0	0	0	0	0	0	0	0	0	0	0	0	0	0	0	0	0	0	0	0	0	0	0	0	0	0	0
F11	Plzeň	2022-05	Beef	Charolais	Hay, grass silage, barley straw, mineral lick.	Outdoor	40	0	No use	0	0	0	0	0	0	0	0	0	0	0	0	0	0	0	0	0	0	0	0	0	0	0	0	0	0	0	0	0	0	0	0	0	0
F12*	Plzeň	2022-04	Beef	Hereford/Aberdeen angus	Straw, hay, alfalfa silage, salt, mineral licks.	Indoor/Outdoor	60	0	No use	0	0	0	0	0	0	0	0	0	0	0	0	0	0	0	0	0	0	0	0	0	0	0	0	0	0	0	0	0	0	0	0	0	0
F13	Hradec Králové	2022-09	Dairy	Cestr	Maize silage, rapeseed meal, brewer’s grains, molasses, meals.	Indoor/Outdoor	260	2969	High use	11.4192	197.6	0	0	0	0	0	0.0108	0	0	10.65	0	0	0.0722	0	0	2759.4	0.27	0	0	0	0	0	0	0.81	0	0	0	0	0	0	0	0	0
F14*	Central Bohemia	2022-08	Beef	Charolais	Pasture, hay, mineral lick.	Outdoor	17	0	No use	0	0	0	0	0	0	0	0	0	0	0	0	0	0	0	0	0	0	0	0	0	0	0	0	0	0	0	0	0	0	0	0	0	0
F15*	Central Bohemia	2022-06	Dairy	Cestr/Montbeliard	Silage, grass silage, hay, grain, rapeseed meal, molasses.	Indoor/Outdoor	400	278	Moderate use	0.695	0	0	1.5	125	0	0	35.6755	1	0	12.5	7.5	50	43.8	0	0	0.6755	0.5	0	0	0	0	0	0	0	0	0	0	0	0	0	0	0	0
F16*	Central Bohemia	2022-10	Dairy	Holstein/Cestr	Alfalfa silage, maize silage, moist maize grain, wheat, brewer’s grains, feed supplements.	Indoor	217	423	Moderate use	1.94931	0	0	0	34.5	0	2	7	338.8	0	0	0	0	0	0	0	3.0464	0	0	0	7.59	0	0	0.8	0	0	0	12.8	0	12.8	0	0	0	4
F17	Central Bohemia	2022-09	Dairy	Holstein	Maize silage, grass silage, straw, brewer’s grains, rapeseed, barley and wheat meal, minerals.	Indoor	500	882	Moderate use	1.764	0	0	0	28	0	0	0	96	47.034	46.788	1.6	0.48	0	0	0	12	0	0	79.2	3.3	348	187.2	32.4	0	0	0	0	0	0	0	0	0	0
F18	Central Bohemia	2022-06	Beef	Charolais	Pasture, oat meal.	Indoor/Outdoor	6	0	No use	0	0	0	0	0	0	0	0	0	0	0	0	0	0	0	0	0	0	0	0	0	0	0	0	0	0	0	0	0	0	0	0	0	0
F19*	Central Bohemia	2022-08	Dairy	Holstein	Maize, alfalfa, clover, mixture (wheat, barley, soybean meals, extracted and extruded meals, corn cob mix).	Indoor	700	559	Moderate use	0.798571	0	0	0	224	0	0	12	17.2	26.339	22.75	126	12	15	0	0	24.2	0	0	0	79.86	0	0	0	0	0	0	0	0	0	0	0	0	0
F20*	Central Bohemia	2022-05	Dairy	Jersey	Wheat straw, maize silage, alfalfa silage, hay, sugar-beet molasses, concentrate mix (winter wheat, feed barley, soybean meal, extracted rapeseed meal, feed limestone), feed salt, sodium bicarbonate, mineral supplements.	Indoor/Outdoor	130	412	Moderate use	3.16923	0	3	2	40.35	0	5	49.5	143.3	106.61	2.725	8.5	50.8	0	0	0	0	0	0	0	0	0	0	0	0	0	0	0	0	0	0	0	0	0
F21	Central Bohemia	2022-05	Beef	Hereford	Grass silage, clover-grass mixture, peas, barley.	Indoor/Outdoor	100	0	No use	0	0	0	0	0	0	0	0	0	0	0	0	0	0	0	0	0	0	0	0	0	0	0	0	0	0	0	0	0	0	0	0	0	0
F22	Ústí nad Labem	2022-07	Beef	Beef Simmental	Silage, hay, maize silage.	Indoor/Outdoor	285	0	No use	0	0	0	0	0	0	0	0	0	0	0	0	0	0	0	0	0	0	0	0	0	0	0	0	0	0	0	0	0	0	0	0	0	0
F23*	Central Bohemia	2022-05	Dairy	Holstein	Maize silage, alfalfa silage, hay, straw, mineral supplements and concentrate mixture.	Indoor	440	4226	High use	9.60455	112.529	56	122.9	518.75	0	393	687.1	1089	0	97	0	54.6	232.876	659.8	28.8	99.4331	73.6	0.3	0	0	0	0	0	0	0	0	0	0	0	0	0	0	0
F24*	Central Bohemia	2022-08	Beef	Charolais/Jersey	Hay, alfalfa silage, meal (triticale, oats).	Indoor	9	0	No use	0	0	0	0	0	0	0	0	0	0	0	0	0	0	0	0	0	0	0	0	0	0	0	0	0	0	0	0	0	0	0	0	0	0
F25*	Central Bohemia	2022-04	Dairy	Charolais/Cervena straka/Dexter	Hay, grass silage, straw, concentrate temix (triticale, oats), mineral licks.	Indoor/Outdoor	250	59	Low use	0.236	3.1348	1.25	0.3	19.6	0.16	3	31.5	0	0	0	0	0	0	0	0	0	0	0	0	0	0	0	0	0	0	0	0	0	0	0	0	0	0
F26	Ústí nad Labem	2022-06	Beef	Dexter	Pasture, hay, grass silage, concentrate mix.	Indoor/Outdoor	13	0	No use	0	0	0	0	0	0	0	0	0	0	0	0	0	0	0	0	0	0	0	0	0	0	0	0	0	0	0	0	0	0	0	0	0	0
F27	Vysočina	2022-09	Dairy	Holstein	Silage, rye, brewer’s grains, grass silage, carrots, concentrate mix.	Indoor	1250	5442	High use	4.3536	0	0	0	378.05	0	0	3347.35	602.25	0	102.6	556.15	19.2	94.625	0	99.3	103.02	75.7	0.4	0	0	0	0	0	0	0.08108	62.7	0	0	0	0	0	0	0
F28*	Ústí nad Labem	2022-07	Dairy	Holstein	Silage, grass silage, ground grain, brewer’s grains, hay, straw, molasses, minerals.	Indoor	200	264	Moderate use	1.32	0	0	0	32	0	0	0.4	2.5	197.543	0	0	30	0.5	0	0	0.5404	0.4	0	0	0	0	0	0	0	0	0	0	0	0	0	0	0	0

## Sheet: Table S2
Table S2	Overview of composite samples of cattle feces from farm floor ('floor' samples). 'Total antibiotics used on farm (g)' is the sum of all antibiotics used on a farm from this period. 'Per head antibiotic use (g)' is 'Total antibiotics used on farm (g)' divided by 'Herd size'. 'Metal PC1' and 'Metal PC2' indicate the positions of samples in Principal Component Analysis plot based on heavy metal cont…
Sample	Farm descriptions								Acinetobacter abundance			Sample chemical composition
Sample code	Farm	Sampling temperature (°C)	Main production type	Main breed	Stabling	Herd size	Total antibiotics used on farm (g)	Per herd antibiotic use (g)*	Acinetobacter abundance**	Total bacteria abundance**	Log relative Acinetobacter abundance	Dry matter (%)	pH	N total (%)	C total (%)	C/N	Total short chain fatty acids (µg/g)	Ag (µg/g)	As (µg/g)	Cd (µg/g)	Co (µg/g)	Cr (µg/g)	Cu (µg/g)	Ni (µg/g)	Pb (µg/g)	Sb (µg/g)	Se (µg/g)	Sr (µg/g)	Zn (µg/g)	Amoxicilin (ng/g)	Ampicilin (ng/g)	Cefquinome (ng/g)	Ceftiofur (ng/g)	Cephapirin (ng/g)	Chlortetracycline (ng/g)	Cloxacillin (ng/g)	Dicloxacillin (ng/g)	Dihydrostreptomycin (ng/g)	Enrofloxacin (ng/g)	Lincomycin (ng/g)	Marbofloxacin (ng/g)	Novobiocin (ng/g)	Oxytetracycline (ng/g)	Penethamate (ng/g)	PenicilinG (ng/g)	Procaine benzylpenicillin (ng/g)	Rifaximin (ng/g)	Sulfadoxine (ng/g)	Tylosin (ng/g)
F01_floor	F01	9	Dairy	Holstein	Indoor	640	10146	15.8531	8135436594	3.8086e+11	-1.67038	15.31	8.25	2.72891	41.6052	15.2461	115.549	0	1.25448	0.179211	1.25448	2.68817	72.9391	5.01792	1.6129	3.40502	1.79211	51.7921	221.147	0	0	0	0	0	0	0	0	0	0	0	0	0	0	0	0	0	0	0	0
F02_floor	F02	20	Beef	Aberdeen angus	Indoor/Outdoor	5	0	0	3.34808e+08	4.10117e+11	-3.08811	14.0802	6.6	1.85722	40.6799	21.9037	70.0197	0	1.32576	0.189394	0.378788	3.59848	23.2955	4.35606	2.08333	3.78788	1.13636	72.1591	86.3636	0	0	0	0	0	0	0	0	0	0	0	0	0	0	0	0	0	0	0	0
F03_floor	F03	22	Dairy	Cestr	Indoor/Outdoor	220	35	0.159091	1.84695e+08	6.91514e+11	-3.57335	13.8792	6.22	2.08789	39.8823	19.1017	114.985	0	0.965251	0.19305	1.9305	1.73745	85.9073	4.6332	0.965251	4.2471	1.73745	85.5212	273.938	0	0	0	0	0	0	0	0	0	0	0	0	0	0	0	0	0	0	0	0
F04_floor	F04	11	Beef	Charolais	Outdoor	15	0	0	558122	2.18633e+11	-5.59299	13.4772	6.76	1.71642	39.6351	23.0917	69.2273	0	1.16959	0.584795	0.779727	2.72904	23.7817	3.11891	2.72904	1.16959	0.779727	60.2339	104.483	0	0	0	0	0	0	0	0	0	0	0	0	0	0	0	0	0	0	0	0
F05_floor	F05	21	Dairy	Cestr/Montbeliard	Indoor	160	256	1.6	18921622510	4.07114e+11	-1.33276	14.4066	6.71	3.05591	44.9663	14.7145	126.799	0	1.45833	0.208333	1.45833	2.29167	75	3.75	2.08333	5	1.66667	80.625	311.667	0	0	0	0	0	0	0	0	0	0	0	0	0	0	0	0	0	0	0	0
F06_floor	F06	19	Dairy	Cestr	Indoor	800	3710	4.6375	6.68791e+06	4.72006e+11	-4.84866	13.74	6.78	2.72299	43.7061	16.0507	104.913	0	1.24555	0.355872	2.84698	6.58363	109.786	5.87189	1.06762	4.09253	1.06762	94.1281	433.096	0	0	0	0	0	0	0	0	0	0	0	0	0	0	0	140.066	185.375	0	0	0
F07_floor	F07	12	Dairy	Holstein	Indoor	1130	51	0.0451327	2839166845	3.77548e+11	-2.12378	13.91	7.27	2.3	42.95	18.6739	123.692	0	1.22378	0.174825	1.74825	2.44755	64.3357	3.67133	1.22378	3.32168	1.74825	82.8671	283.392	0	0	0	0	0	0	0	0	0	0	0	0	0	0	0	0	0	0	0	0
F08_floor	F08	13	Dairy	Holstein	Indoor	150	448	2.98667	9367669273	3.98138e+11	-1.6284	14.07	7.75	2.41486	43.6135	18.0605	120.907	0	1.9685	0.19685	0.590551	2.55906	87.9921	6.10236	1.1811	4.33071	2.16535	62.0079	242.323	0	0	0	0	0	0	0	0	0	0	47.1722	0	0	0	0	0	0	0	0	0
F09_floor	F09	15	Beef	Hereford	Indoor/Outdoor	100	27	0.27	5.38674e+06	3.26356e+11	-4.78237	12.5483	7.15	2.19864	45.0817	20.5044	51.6504	0	0.84317	1.18044	0.505902	1.34907	34.2327	5.56492	1.0118	-0.84317	0.337268	106.239	107.589	0	0	0	0	0	0	0	0	0	0	0	0	0	0	0	0	0	0	0	0
F10_floor	F10	21	Dairy	Cestr/Limousin	Outdoor	56	0	0	34712377735	4.99575e+11	-1.15812	12.6	7.18	2.46089	44.0857	17.9146	79.8088	0	1.17647	0.588235	0.392157	1.37255	31.9608	3.13725	1.37255	4.90196	0.784314	185.49	122.941	0	0	0	0	0	0	0	0	0	0	0	0	0	0	0	0	0	0	0	0
F11_floor	F11	16	Beef	Charolais	Outdoor	40	0	0	3.05261e+07	3.83222e+11	-4.09878	10.9794	6.95	2.43876	43.9175	18.0081	75.7728	0	1.60643	1.00402	0.803213	2.40964	26.506	6.2249	2.00803	4.21687	0	79.9197	88.1526	0	0	0	0	0	0	0	0	0	0	0	0	0	0	0	22.4039	0	0	0	0
F12_floor	F12	11	Beef	Hereford/Aberdeen angus	Indoor/Outdoor	60	0	0	2680945256	2.25152e+11	-1.92419	12.0898	7.98	1.71567	43.7422	25.4957	274.104	0	0.775194	0.387597	0.775194	1.35659	19.5736	2.71318	0.968992	-0.775194	0.387597	74.031	81.5891	0	0	0	0	0	0	0	0	0	0	0	0	0	0	0	0	0	0	0	0
F13_floor	F13	23	Dairy	Cestr	Indoor/Outdoor	260	2969	11.4192	9951162042	4.26116e+11	-1.63165	13.0797	6.93	2.65	44.5727	16.8198	103.686	0	0.865801	0.21645	1.08225	2.38095	70.5628	3.8961	1.08225	4.11255	1.7316	69.9134	281.385	0	0	0	0	0	0	0	0	0	0	0	0	0	0	0	0	0	0	0	0
F14_floor	F14	23	Beef	Charolais	Outdoor	17	0	0	929599	4.55712e+11	-5.69039	11.2842	7.48	1.93456	44.0059	22.7473	57.128	0	1.35135	0.3861	0.3861	2.7027	27.4131	7.72201	1.9305	4.05405	1.1583	80.1158	87.6448	0	0	0	0	0	0	0	0	0	0	0	0	0	0	0	0	0	0	0	0
F15_floor	F15	23	Dairy	Cestr/Montbeliard	Indoor/Outdoor	400	278	0.695	2.37551e+08	6.41366e+11	-3.43135	13.3062	6.78	2.2534	46.1325	20.4724	78.6631	0	1.4	0.4	0.2	1.8	18.8	2	2.4	5	1	90.2	83.6	0	0	0	0	0	0	0	0	0	0	0	0	418.653	0	0	0	0	109.028	0	0
F16_floor	F16	9	Dairy	Holstein/Cestr	Indoor	217	423	1.94931	1946067267	3.8373e+11	-2.29487	15.53	6.97	2.59714	43.7713	16.8537	140.605	0	0.590551	0.19685	0.984252	1.77165	63.3858	3.54331	0.984252	3.93701	1.5748	67.3228	267.323	0	0	0	0	0	0	0	0	0	0	0	0	0	0	0	0	0	0	0	0
F17_floor	F17	25	Dairy	Holstein	Indoor	500	882	1.764	18430891763	4.97412e+11	-1.43117	15.429	7.21	2.51081	43.3094	17.2492	112.705	0	0.974026	0.162338	1.46104	2.92208	91.7208	3.8961	1.2987	3.08442	1.94805	118.994	344.481	0	0	0	0	0	0	0	0	0	0	151.868	37.2316	0	0	0	0	0	0	0	0
F18_floor	F18	20	Beef	Charolais	Indoor/Outdoor	6	0	0	8806207842	3.40964e+11	-1.58792	13.7026	7.51	2.49291	42.5288	17.0599	64.6596	0	1.80723	0.803213	1.20482	6.2249	45.7831	18.2731	2.81124	4.41767	1.00402	168.675	170.08	0	0	0	0	0	0	0	0	0	0	0	0	0	0	0	0	0	0	0	0
F19_floor	F19	19	Dairy	Holstein	Indoor	700	559	0.798571	8.96152e+08	3.43191e+11	-2.58315	14.74	6.76	2.16214	43.3313	20.041	115.952	0	1.82186	0.202429	2.63158	6.68016	88.4615	5.66802	1.21457	4.65587	1.417	60.9312	334.413	0	0	0	0	0	0	0	0	0	0	0	0	0	0	0	0	0	0	0	0
F20_floor	F20	22	Dairy	Jersey	Indoor/Outdoor	130	412	3.16923	1966960837	3.32396e+11	-2.22786	13.5889	7.26	2.25118	44.3478	19.6998	92.7967	0	0.775194	0.387597	1.93798	2.71318	77.1318	5.42636	1.74419	4.26357	1.16279	77.7132	274.612	0	0	0	0	0	0	0	0	0	0	0	0	0	0	0	0	0	0	0	0
F21_floor	F21	15	Beef	Hereford	Indoor/Outdoor	100	0	0	1412657062	3.51382e+11	-2.39574	12.8603	7.2	2.84983	45.2239	15.869	110.445	0	0.77821	0.389105	0.194553	0.972763	22.5681	6.03113	0.77821	4.28016	0.389105	86.3813	75.8755	0	0	0	0	0	0	0	0	0	0	0	0	0	0	0	25.8534	0	0	0	0
F22_floor	F22	19	Beef	Beef Simmental	Indoor/Outdoor	285	0	0	1.48648e+07	3.6024e+11	-4.38443	14.7809	6.8	2.19077	44.2288	20.1887	50.8196	0	1.31086	0.187266	0.374532	2.05993	32.2097	2.80899	2.24719	3.74532	1.1236	135.393	109.363	0	0	0	0	0	0	0	0	0	0	0	0	0	0	0	0	0	0	0	0
F23_floor	F23	16	Dairy	Holstein	Indoor	440	4226	9.60455	3.24015e+07	2.90694e+11	-3.95287	12.6458	7.34	2.20132	43.6537	19.8307	118.641	0	0.643087	0.160772	1.1254	1.44695	56.2701	4.01929	0.803859	3.53698	1.44695	53.2154	189.228	0	0	0	0	0	0	0	0	0	0	0	0	0	0	0	0	0	0	0	0
F24_floor	F24	22	Beef	Charolais/Jersey	Indoor	9	0	0	2.14048e+08	3.46759e+11	-3.20952	13.937	7.84	1.8017	43.567	24.1811	42.872	0	0.93633	0.374532	1.1236	2.43446	78.2772	3.93258	1.1236	3.55805	1.68539	75.4682	312.172	0	0	0	0	0	0	0	0	0	0	0	0	0	0	0	0	0	0	0	0
F25_floor	F25	15	Dairy	Charolais/Cervena straka/Dexter	Indoor/Outdoor	250	59	0.236	7.91788e+07	1.91135e+11	-3.38273	11.086	7.74	1.35987	45.0864	33.155	30.0811	0	1.14504	0.381679	1.9084	3.43511	60.687	3.81679	2.29008	8.01527	1.9084	99.6183	203.817	0	0	0	0	0	0	0	0	0	0	0	0	0	0	0	0	0	0	0	0
F26_floor	F26	20	Beef	Dexter	Indoor/Outdoor	13	0	0	7.05512e+06	2.91901e+11	-4.61673	12.8512	7.04	1.92053	42.5359	22.148	67.0595	0	2.04082	0.204082	0.408163	2.85714	25.7143	4.89796	2.04082	4.4898	1.63265	108.367	94.2857	0	0	0	0	0	0	0	0	0	0	0	0	0	0	0	0	0	0	0	0
F27_floor	F27	8	Dairy	Holstein	Indoor	1250	5442	4.3536	6.78035e+07	3.54492e+11	-3.71836	14	6.88	2.65005	45.4186	17.1388	108.047	0	0.883392	0.176678	0.176678	2.12014	140.283	3.53357	1.06007	3.35689	2.29682	47.3498	310.777	0	0	0	0	0	0	0	0	0	0	0	0	0	0	0	0	0	0	0	0
F28_floor	F28	19	Dairy	Holstein	Indoor	200	264	1.32	1.09367e+07	4.08348e+11	-4.57214	13.498	6.79	1.7758	43.2945	24.3803	97.5774	0	0.60241	0.200803	0.60241	2.40964	49.1968	3.01205	1.40562	3.81526	1.40562	67.4699	202.209	0	0	0	0	0	0	0	0	0	0	0	0	0	0	0	0	0	0	0	0
*Based on total antibiotics used in the farms six months before sampling
**Acinetobacter and total bacterial abundance expressed as 16S rRNA per g dry weight
[truncated: 3 more columns]

## Sheet: Table S3
Table S3	Overview of fecal samples from individual cows ('cow' samples). 'Total antibiotics used on farm (g)' is the sum of all antibiotics used on a farm from this period. 'Per head antibiotic use (g)' is 'Total antibiotics used on farm (g)' divided by 'Herd size'. Acinetobacter and total bacterial abundance expressed as 16S rRNA per g dry weight. 'Metal PC1' and 'Metal PC2' indicate the positions of sam…
Sample	Farm descriptions							Cow descriptions			Acinetobacter abundance			Sample chemical composition
Sample code	Farm	Sampling temperature	Main production type	Stabling	Herd size	Total antibiotics used on farm (g)	Per herd antibiotic use (g)*	Cow breed	Cow age (years)	Antibiotics administrated to individual cows*	Acinetobacter abundance**	Total bacteria abundance**	Log relative Acinetobacter abundance	Dry matter (%)	pH	N (%)	C (%)	C/N (%)	Total short chain fatty acids (µg/g)	Ag (µg/g)	As (µg/g)	Cd (µg/g)	Co (µg/g)	Cr (µg/g)	Cu (µg/g)	Ni (µg/g)	Pb (µg/g)	Sb (µg/g)	Se (µg/g)	Sr (µg/g)	Zn (µg/g)	Amoxicilin (ng/g)	Ampicilin (ng/g)	Cefquinome (ng/g)	Ceftiofur (ng/g)	Cephapirin (ng/g)	Chlortetracycline (ng/g)	Cloxacillin (ng/g)	Dicloxacillin (ng/g)	Dihydrostreptomycin (ng/g)	Enrofloxacin (ng/g)	Lincomycin (ng/g)	Marbofloxacin (ng/g)	Novobiocin (ng/g)	Oxytetracycline (ng/g)	Penethamate (ng/g)	PenicilinG (ng/g)	Procaine benzylpenicillin (ng/g)	Rifaximin (ng/g)
F03_C1	F03	22	Dairy	Outdoor/Indoor	220	35	0.159091	Cestr	2	No	3.70417e+07	6.26188e+11	-4.22801	12.9551	7.16	1.88592	44.6909	23.6971	126.077	0	1.54639	0.343643	4.811	4.46735	96.5636	7.73196	1.71821	4.12371	2.06186	160.481	413.058	0	0	0	0	0	0	0	0	0	0	0	0	0	0	0	0	0	0
F03_C2	F03	22	Dairy	Outdoor/Indoor	220	35	0.159091	Cestr	10	No	8.99528e+06	6.25557e+11	-4.84225	16.4561	7.81	1.7824	44.4353	24.93	68.2815	0	0.915751	0.18315	3.2967	2.5641	67.3993	4.94505	1.28205	4.3956	2.01465	116.3	289.194	0	0	0	0	0	0	0	0	0	0	0	0	0	0	0	0	0	0
F03_C3	F03	22	Dairy	Outdoor/Indoor	220	35	0.159091	Cestr	5	No	1.3216e+08	3.75927e+11	-3.454	13.5931	6.56	1.98831	44.4587	22.36	67.5193	0	0.957854	0.191571	2.10728	1.53257	75.6705	4.21456	1.14943	4.78927	1.53257	79.1188	243.678	0	0	0	0	0	0	0	0	0	0	0	0	0	0	0	0	0	0
F03_C4	F03	22	Dairy	Outdoor/Indoor	220	35	0.159091	Cestr	4	No	6.2143e+06	4.46955e+11	-4.85687	15.0931	5.83	2.39778	44.5315	18.572	158.601	0	0.899281	0.179856	1.61871	1.61871	81.295	4.4964	1.07914	3.77698	1.97842	101.799	255.216	0	0	0	0	0	0	0	0	0	0	0	0	0	0	0	0	0	0
F03_C5	F03	22	Dairy	Outdoor/Indoor	220	35	0.159091	Cestr	3	No	1073617210	4.00341e+11	-2.57158	12.5928	6.69	1.85683	45.3795	24.4392	70.9201	0	0.88968	0.177936	1.06762	1.24555	52.4911	3.20285	1.24555	3.91459	1.06762	49.2883	159.431	0	0	0	0	0	0	0	0	0	0	0	0	0	0	0	0	0	0
F03_C6	F03	22	Dairy	Outdoor/Indoor	220	35	0.159091	Cestr	3	No	5685242648	4.84014e+11	-1.93011	10.8624	6.55	1.82149	43.7397	24.0132	160.032	0	1.09091	0.181818	1.81818	1.45455	63.0909	3.63636	1.27273	4.54545	1.81818	68.5455	218.364	0	0	0	0	0	0	0	0	0	0	0	0	0	0	0	0	0	0
F03_C7	F03	22	Dairy	Outdoor/Indoor	220	35	0.159091	Cestr	2	No	5.90468e+08	5.00485e+11	-2.92819	14.007	6.15	2.50154	43.8732	17.5385	117.973	0	1.13636	0.227273	2.5	1.81818	86.3636	5.45455	1.36364	5.22727	2.04545	89.5455	305.227	0	0	0	0	0	0	0	0	0	0	0	0	0	0	0	0	0	0
F04_C1	F04	11	Beef	Outdoor	15	0	0	Charolais	8	No	691424	2.67495e+11	-5.58757	15.2752	7.15	1.61537	41.7878	25.8689	48.0368	0	1.27273	0.727273	0.727273	2.54545	14.9091	3.09091	2.90909	0.727273	0.727273	59.4545	76.1818	0	0	0	0	0	0	0	0	0	0	0	0	0	0	0	0	0	0
F04_C2	F04	11	Beef	Outdoor	15	0	0	Charolais	8	No	637729	2.72382e+11	-5.63054	16.3375	6.8	1.74751	41.6687	23.8447	48.4413	0	1.38648	0.693241	0.693241	2.42634	16.4645	2.94627	2.59965	0.519931	0.17331	57.7123	78.1629	0	0	0	0	0	0	0	0	0	0	0	0	0	0	0	0	0	0
F04_C3	F04	11	Beef	Outdoor	15	0	0	Charolais	6	No	841333	3.50862e+11	-5.62017	12.1378	6.8	1.7438	41.1349	23.5892	73.8093	0	1.1583	0.579151	0.772201	3.0888	21.2355	4.05405	2.89575	4.2471	0.3861	71.0425	86.1004	0	0	0	0	0	0	0	0	0	0	0	0	0	0	0	0	0	0
F04_C4	F04	11	Beef	Outdoor	15	0	0	Charolais	6	No	700554	3.20717e+11	-5.66068	14.9736	6.9	1.54718	42.5723	27.5161	60.6351	0	0.980392	0.784314	0.588235	2.15686	19.2157	2.7451	2.15686	0.980392	0.392157	52.1569	93.7255	0	0	0	0	0	0	0	0	0	0	0	0	0	0	0	0	0	0
F04_C5	F04	11	Beef	Outdoor	15	0	0	Charolais	2	No	902222	2.84284e+11	-5.49844	11.5481	7.44	1.81685	42.8386	23.5785	36.8418	0	1.47601	0.738007	1.29151	3.13653	40.5904	4.05904	2.76753	4.24354	0.738007	72.1402	169.004	0	0	0	0	0	0	0	0	0	0	0	0	0	0	0	0	0	0
F04_C6	F04	11	Beef	Outdoor	15	0	0	Charolais	2	No	755564	2.87369e+11	-5.58017	13.9785	7.17	1.71395	43.2422	25.2295	105.591	0	1.25899	0.899281	0.899281	2.8777	27.8777	3.59712	3.23741	3.95683	0.539568	60.0719	117.986	0	0	0	0	0	0	0	0	0	0	0	0	0	0	0	0	0	0
F05_C1	F05	21	Dairy	Indoor	160	256	1.6	Cestr	5	Marbofloxacin, Amoxicillin + Clavulanic acid	729324	2.63889e+11	-5.5585	14.2857	7.67	2.2143	44.7685	20.2179	40.1233	0	1.35659	0.387597	0.775194	2.32558	75.1938	2.51938	2.51938	3.87597	0.387597	124.419	181.977	0	0	0	0	0	0	0	0	0	0	0	865.578	0	0	0	0	0	0
F05_C2	F05	21	Dairy	Indoor	160	256	1.6	Cestr	5	No	699961	3.22849e+11	-5.66393	14.6865	6.44	3.3293	44.3297	13.315	81.9278	0	1.20968	0.201613	1.41129	2.21774	86.2903	4.43548	2.01613	4.43548	1.20968	109.677	312.702	0	0	0	0	0	0	0	0	0	0	0	0	0	0	0	0	0	0
F05_C3	F05	21	Dairy	Indoor	160	256	1.6	Cestr	3	Procaine benzylpenicillin, Neomycin, Dihydrostreptomycin, Novobiocin	1.81312e+07	3.25401e+11	-4.25399	15.4378	6.45	2.80569	45.28	16.1386	72.1415	0	1.57658	0.225225	1.35135	1.8018	78.3784	2.92793	2.02703	5.18018	1.12613	65.5405	312.613	0	0	0	0	0	0	0	0	0	0	0	0	0	0	0	0	24.9061	0
F05_C4	F05	21	Dairy	Indoor	160	256	1.6	Cestr	2	No	764024	3.83918e+11	-5.70113	13.5454	6.6	3.74787	44.5184	11.8783	73.0343	0	1.21457	0.404858	1.82186	2.42915	93.3198	4.25101	2.22672	4.65587	1.01215	94.9393	417.004	0	0	0	0	0	0	0	0	0	0	0	0	0	0	0	0	0	0
F05_C5	F05	21	Dairy	Indoor	160	256	1.6	Cestr	2	No	700832	3.87726e+11	-5.74291	14.6683	6.51	2.92696	44.7675	15.2949	193.526	0	1.19522	0.199203	1.39442	2.39044	70.9163	3.98406	2.19124	4.38247	1.59363	98.6056	325.697	0	0	0	0	0	0	0	0	0	0	0	0	0	0	0	0	0	0
F09_C1	F09	15	Beef	Outdoor/Indoor	100	27	0.27	Hereford	5	No	7.56384e+07	2.80409e+11	-3.56905	11.0829	7.19	2.36147	44.0822	18.6672	57.8988	0	0.590551	1.1811	0.393701	1.37795	26.9685	5.31496	0.787402	-1.1811	0.393701	109.646	84.4488	0	0	0	0	0	0	0	0	0	0	0	0	0	0	0	0	0	0
F09_C2	F09	15	Beef	Outdoor/Indoor	100	27	0.27	Hereford	8	No	1.77359e+07	2.74539e+11	-4.18975	12.1756	6.69	2.17414	44.2984	20.3751	43.3518	0	0.733945	1.10092	0.366972	1.2844	33.211	4.77064	0.733945	-0.733945	0.733945	100.734	116.147	0	0	0	0	0	0	0	0	0	0	0	0	0	0	0	0	0	0
F09_C3	F09	15	Beef	Outdoor/Indoor	100	27	0.27	Hereford	7	No	7.34765e+06	3.08229e+11	-4.62273	12.4224	7.17	2.11215	44.4902	21.064	70.304	0	0.772201	1.73745	0.3861	1.35135	25.6757	5.40541	0.772201	-1.1583	-0.19305	101.737	93.0502	0	0	0	0	0	0	0	0	0	0	0	0	0	0	0	0	0	0
F09_C4	F09	15	Beef	Outdoor/Indoor	100	27	0.27	Hereford	7	No	1.44076e+07	3.4751e+11	-4.38238	10.9665	6.68	1.87957	44.8634	23.869	72.1328	0	0.386847	0.773694	0.386847	0.967118	22.0503	3.86847	0.580271	-1.16054	0	77.3694	71.5667	0	0	0	0	0	0	0	0	0	0	0	0	0	0	0	0	0	0
F09_C5	F09	15	Beef	Outdoor/Indoor	100	27	0.27	Hereford	6	No	1.11315e+07	3.64637e+11	-4.51531	12.8088	6.74	2.16206	44.4443	20.5564	71.2141	0	0.785855	0.982318	0.392927	1.57171	32.22	3.92927	0.982318	-0.785855	0.196464	88.6051	101.768	0	0	0	0	0	0	0	0	0	0	0	0	0	0	0	0	0	0
F09_C6	F09	15	Beef	Outdoor/Indoor	100	27	0.27	Hereford	6	No	867720	3.7219e+11	-5.63238	12.0072	7.03	2.17796	44.925	20.6271	47.0938	0	0.581395	0.968992	0.387597	1.16279	26.1628	4.45736	0.775194	-0.581395	0.581395	89.1473	87.0155	0	0	0	0	0	0	0	0	0	0	0	0	0	0	0	0	0	0
F09_C7	F09	15	Beef	Outdoor/Indoor	100	27	0.27	Hereford	6	No	3112596111	3.28221e+11	-2.02304	12.6484	6.82	2.33705	44.6907	19.1227	33.6477	0	0.549451	0.915751	0.3663	1.4652	37.9121	5.12821	0.732601	-0.732601	0.549451	100.916	127.106	0	0	0	0	0	0	0	0	0	0	0	0	0	0	0	0	0	0
F12_C1	F12	11	Beef	Outdoor/Indoor	60	0	0	Cestr	8	No	7.17637e+08	2.29185e+11	-2.50428	9.37973	7.29	1.48402	44.2	29.7839	73.307	0	0.963391	0.385356	0.385356	0.770713	13.4875	2.11946	0.770713	0.770713	0.385356	76.6859	62.2351	0	0	0	0	0	0	0	0	0	0	0	0	0	0	0	0	0	0
F12_C2	F12	11	Beef	Outdoor/Indoor	60	0	0	Hereford	5	No	932215	2.67687e+11	-5.45811	11.3296	6.85	1.90039	44.9475	23.6517	75.0885	0	0.592885	0.395257	0.395257	0.790514	16.6008	2.7668	0.790514	1.18577	0	83.9921	70.1581	0	0	0	0	0	0	0	0	0	0	0	0	0	0	0	0	0	0
F12_C3	F12	11	Beef	Outdoor/Indoor	60	0	0	Aberdeen angus	4	No	756092	2.27759e+11	-5.4789	13.8737	7.05	2.26782	44.9299	19.8119	98.48	0	0.776699	0.38835	0.582524	0.970874	20.9709	3.30097	0.582524	0.970874	0.776699	126.602	108.544	0	0	0	0	0	0	0	0	0	0	0	0	0	0	0	0	0	0
F12_C4	F12	11	Beef	Outdoor/Indoor	60	0	0	Aberdeen angus	4	No	939379	2.40733e+11	-5.40869	11.3208	6.83	1.75329	46.3776	26.4518	41.4184	0	0.976562	0.390625	0.78125	1.17188	21.0938	3.125	0.78125	4.10156	0	112.695	85.5469	0	0	0	0	0	0	0	0	0	0	0	0	0	0	0	0	0	0
F12_C5	F12	11	Beef	Outdoor/Indoor	60	0	0	Hereford	3	No	702282	1.79182e+11	-5.40678	10.3084	6.88	1.76294	44.5959	25.2963	41.0211	0	0.60241	0.200803	0.401606	0.803213	13.253	2.40964	1.00402	0.803213	0.200803	67.6707	69.0763	0	0	0	0	0	0	0	0	0	0	0	0	0	0	0	0	0	0
F12_C6	F12	11	Beef	Outdoor/Indoor	60	0	0	Aberdeen angus	4	No	1.00963e+06	2.08223e+11	-5.31437	10.7556	6.79	1.69587	45.2609	26.6888	53.5103	0	0.790514	0.395257	0.395257	0.988142	18.5771	2.96443	0.592885	-0.592885	0.197628	85.1779	66.996	0	0	0	0	0	0	0	0	0	0	0	0	0	0	0	0	0	0
F12_C7	F12	11	Beef	Outdoor/Indoor	60	0	0	Hereford	2	No	876691	2.24034e+11	-5.40747	11.8046	6.97	1.57763	46.7039	29.6037	60.6639	0	0.740741	0.37037	2.22222	1.48148	36.4815	3.51852	0.740741	4.81481	0.925926	101.852	153.889	0	0	0	0	0	0	0	0	0	0	0	0	0	0	0	0	0	0
F14_C1	F14	23	Beef	Outdoor	17	0	0	Charolais	8	No	1.08047e+06	3.89756e+11	-5.55718	9.64295	7.14	1.67657	43.1793	25.7546	37.1682	0	1.73077	0.384615	0.576923	3.07692	22.3077	7.5	1.92308	3.65385	0.961538	70.3846	72.6923	0	0	0	0	0	0	0	0	0	0	0	0	0	0	0	0	0	0
F14_C2	F14	23	Beef	Outdoor	17	0	0	Charolais	13	No	1.09066e+06	3.85842e+11	-5.54872	9.42552	7.53	1.93377	41.0741	21.2404	60.5499	0	1.17188	0.390625	0.390625	2.14844	21.4844	5.85938	1.17188	3.71094	1.17188	72.6562	75	0	0	0	0	0	0	0	0	0	0	0	0	0	0	0	0	0	0
F14_C3	F14	23	Beef	Outdoor	17	0	0	Charolais	10	No	1.29726e+07	7.75683e+11	-4.77666	6.9891	7.33	2.25524	44.9342	19.9243	80.2988	0	1.69811	0.377358	0.377358	2.45283	30.3774	7.92453	1.50943	3.77358	1.32075	90.3774	103.208	0	0	0	0	0	0	0	0	0	0	0	0	0	0	0	0	0	0
F14_C4	F14	23	Beef	Outdoor	17	0	0	Charolais	12	No	1.05346e+06	4.70626e+11	-5.65006	10.0948	7.28	1.72125	43.291	25.1508	55.8515	0	1.41129	0.403226	0.403226	2.41935	24.3952	6.85484	1.6129	4.03226	0.806452	68.75	85.6855	0	0	0	0	0	0	0	0	0	0	0	0	0	0	0	0	0	0
F14_C5	F14	23	Beef	Outdoor	17	0	0	Charolais	3	No	1.10365e+06	5.52564e+11	-5.69955	9.50464	7.28	1.83854	42.4104	23.0674	40.3882	0	0.590551	0.19685	0.590551	1.9685	45.0787	2.95276	0.590551	3.74016	1.77165	76.7717	163.189	0	0	0	0	0	0	0	0	0	0	0	0	0	0	0	0	0	0
F15_C1	F15	22	Dairy	Outdoor/Indoor	400	278	0.695	Cestr	6	Procaine benzylpenicillin, Dihydrostreptomycin	8.23123e+06	5.92315e+11	-4.85709	11.0889	6.49	2.43353	46.6315	19.1621	54.0772	0	0.925926	0.37037	0.185185	1.11111	13.7037	1.11111	1.48148	4.25926	1.48148	58.7037	70.9259	0	0	0	0	0	0	0	0	252.669	0	0	0	0	0	0	126.457	345.406	0
F15_C2	F15	22	Dairy	Outdoor/Indoor	400	278	0.695	Cestr	5	Procaine benzylpenicillin, Neomycin, Dihydrostreptomycin, Novobiocin	738138	6.48647e+11	-5.94387	13.9269	6.57	2.75563	46.5538	16.8941	136.806	0	0.957854	0.766284	0.574713	1.72414	41.3793	2.29885	2.29885	4.40613	1.341	118.199	120.881	0	0	0	0	0	0	0	0	0	0	0	0	0	0	0	0	0	0
F15_C3	F15	22	Dairy	Outdoor/Indoor	400	278	0.695	Cestr	4	No	7.17648e+06	6.79221e+11	-4.9761	12.8046	6.6	2.21329	46.4624	20.9925	73.5286	0	1.1583	0.3861	0.3861	1.5444	16.7954	1.9305	1.5444	3.861	0.965251	69.8842	73.3591	0	0	0	0	0	0	0	0	0	0	0	0	0	0	0	0	0	0
F15_C4	F15	22	Dairy	Outdoor/Indoor	400	278	0.695	Cestr	4	No	8.47919e+06	7.16889e+11	-4.9271	10.7646	6.4	2.2589	45.8378	20.2921	78.4379	0	1.22951	0.614754	0.204918	1.43443	22.1311	1.84426	1.84426	4.71311	1.22951	92.8279	96.1066	0	0	0	0	0	0	0	0	0	0	0	0	0	0	0	0	0	0
F15_C5	F15	22	Dairy	Outdoor/Indoor	400	278	0.695	Cestr	4	Procaine benzylpenicillin, Neomycin, Dihydrostreptomycin, Novobiocin, Marbofloxacin	8.9452e+06	5.76013e+11	-4.80884	10.3426	6.78	2.85911	44.0944	15.4224	75.7613	0	0.968992	0.581395	0.387597	1.93798	26.938	2.51938	2.32558	4.65116	1.16279	107.946	161.047	0	0	0	0	0	0	0	0	0	0	0	0	0	0	0	0	0	0
F16_C1	F16	9	Dairy	Indoor	217	423	1.94931	Holstein	6	Lincomycin, Neomycin, Ampicillin, Dicloxacillin, Amoxicillin + Clavulanic acid	639622	3.82099e+11	-5.77625	16.4	6.96	2.51783	43.5305	17.2889	114.202	0	0.865052	0.17301	1.21107	2.07612	82.0069	3.97924	1.03806	3.2872	1.7301	79.4118	380.45	0	0	0	0	0	0	0	0	0	0	0	0	0	0	0	0	0	0
F16_C10	F16	9	Dairy	Indoor	217	423	1.94931	Holstein	3	Amoxicillin + Clavulanic acid	742631	2.87269e+11	-5.58751	14.32	7.09	2.72156	44.3366	16.2908	119.014	0	0.83612	0.167224	1.17057	2.00669	73.0769	4.01338	1.33779	3.51171	1.33779	76.5886	292.977	0	0	0	0	0	0	0	0	0	0	0	0	0	0	0	0	0	0
F16_C11	F16	9	Dairy	Indoor	217	423	1.94931	Holstein	4	Amoxicillin + Clavulanic acid, Ampicillin, Dicloxacillin	9.43777e+07	3.55409e+11	-3.57586	15.29	6.87	2.98536	43.8463	14.6871	117.454	0	0.796813	0.199203	1.39442	2.19124	91.6335	4.58167	1.39442	4.38247	2.19124	97.8088	408.964	0	0	0	0	0	0	0	0	0	0	0	0	0	0	0	0	0	0
F16_C2	F16	9	Dairy	Indoor	217	423	1.94931	Holstein	4	Amoxicillin + Clavulanic acid	1.84197e+07	4.06306e+11	-4.34357	14.43	6.75	2.5309	43.7612	17.2907	122.579	0	1	0.166667	1.16667	2	77.6667	4	1	3.16667	1.83333	98.6667	314.833	0	0	0	0	0	0	0	0	0	0	0	0	0	0	0	0	0	0
F16_C3	F16	9	Dairy	Indoor	217	423	1.94931	Holstein	4	No	5.36249e+07	2.67054e+11	-3.69723	13.13	6.98	2.62115	44.2409	16.8784	154.732	0	0.93633	0.187266	1.1236	1.87266	76.9663	3.93258	1.1236	3.55805	1.87266	77.3408	321.348	0	0	0	0	0	0	0	0	0	0	0	0	0	0	0	0	0	0
F16_C4	F16	9	Dairy	Indoor	217	423	1.94931	Holstein	4	Tetracycline	672716	3.64597e+11	-5.73398	15.7	7.19	2.41926	43.6615	18.0475	97.6714	0	1.28676	0.183824	0.919118	2.57353	69.3015	3.86029	3.30882	3.67647	1.65441	109.375	286.765	0	0	0	0	0	0	0	0	0	0	0	0	0	384.387	0	0	0	0
F16_C5	F16	9	Dairy	Indoor	217	423	1.94931	Holstein	4	Amoxicillin + Clavulanic acid	1.61648e+07	3.87551e+11	-4.37976	14.82	6.75	2.46309	42.2352	17.1472	150.697	0	1.1236	0.187266	1.31086	2.05993	76.4045	3.93258	1.1236	3.93258	1.49813	94.0075	355.618	0	0	0	0	0	0	0	0	0	0	0	0	0	0	0	0	0	0
F16_C6	F16	9	Dairy	Indoor	217	423	1.94931	Holstein	3	Ceftiofur (3rd generation cephalosporin)	702333	3.51712e+11	-5.69964	14.54	7.09	2.28429	44.559	19.5068	87.8512	0	1.27273	0.181818	1.09091	2.18182	62.1818	4	1.27273	3.81818	1.09091	97.6364	266.545	0	0	0	0	0	0	0	0	0	0	0	0	0	0	0	0	0	0
F16_C7	F16	9	Dairy	Indoor	217	423	1.94931	Holstein	3	No	695064	3.40867e+11	-5.69056	15.3	7.12	2.5224	44.6501	17.7015	108.712	0	0.976562	0.390625	1.36719	2.14844	82.2266	4.49219	1.17188	4.6875	1.95312	91.7969	351.367	0	0	0	0	0	0	0	0	0	0	0	0	0	0	0	0	0	0
F16_C8	F16	9	Dairy	Indoor	217	423	1.94931	Holstein	3	No	827586	3.96872e+11	-5.68084	12.85	6.58	2.55804	44.4305	17.3689	145.213	0	0.93633	0.187266	1.31086	1.87266	77.7154	3.74532	1.31086	4.11985	2.05993	77.5281	351.498	0	0	0	0	0	0	0	0	0	0	0	0	0	0	0	0	0	0
F16_C9	F16	9	Dairy	Indoor	217	423	1.94931	Holstein	3	Amoxicillin + Clavulanic acid, Lincomycin, Neomycin	738060	3.13067e+11	-5.62755	14.31	6.63	3.05201	44.8187	14.685	128.941	0	0.816327	0.204082	1.22449	2.04082	79.3878	4.08163	1.22449	4.4898	1.42857	75.7143	326.122	0	0	0	0	0	0	0	0	0	0	0	0	0	0	0	0	0	0
F19_C1	F19	19	Dairy	Indoor	700	559	0.798571	Holstein	7	No	738576	3.22753e+11	-5.64047	14.3	6.79	1.97291	46.6673	23.654	85.7064	0	1.48699	0.371747	2.60223	6.50558	90.5204	6.69145	0.743494	3.90335	0.929368	60.4089	331.227	0	0	0	0	0	0	0	0	0	0	0	0	0	0	0	0	0	0
F19_C2	F19	19	Dairy	Indoor	700	559	0.798571	Red Holstein	6	No	703981	3.40377e+11	-5.6844	14.8	6.96	2.67608	43.8586	16.3891	159.671	0	2.08333	0.416667	3.95833	10.2083	140.417	8.95833	1.66667	4.58333	2.08333	102.708	571.25	0	0	0	0	0	0	0	0	0	0	0	0	0	0	0	0	0	0
F19_C3	F19	19	Dairy	Indoor	700	559	0.798571	Holstein	5	Procaine benzylpenicillin	664332	4.46029e+11	-5.82698	15.79	6.88	2.41719	45.2641	18.7259	89.4275	0	1.85874	0.371747	3.5316	8.55019	129.554	7.99257	1.30112	4.83271	2.23048	90.3346	487.175	0	0	0	0	0	0	0	0	0	0	0	0	0	0	0	0	0	0
F19_C4	F19	19	Dairy	Indoor	700	559	0.798571	Holstein	5	Cloxacillin, Lincomycin, Neomycin	7.61308e+06	4.27622e+11	-4.7495	12.32	6.67	2.40611	44.8075	18.6224	112.472	0	1.20482	0.200803	2.20884	6.2249	80.9237	5.42169	2.40964	4.61847	1.20482	55.2209	333.333	0	0	0	0	0	0	0	0	0	0	0	0	0	0	0	0	0	0
F19_C5	F19	19	Dairy	Indoor	700	559	0.798571	Holstein	4	Ceftiofur (3rd generation cephalosporin), Procaine benzylpenicillin	6.12431e+06	3.64737e+11	-4.77492	15.21	7	2.42297	44.9465	18.5502	123.143	0	1.49254	0.373134	2.79851	7.08955	124.813	7.46269	2.23881	3.91791	1.1194	82.4627	443.284	0	0	0	0	0	0	0	0	0	0	0	0	0	0	0	80.2679	641.558	0
F19_C6	F19	19	Dairy	Indoor	700	559	0.798571	Red Holstein	4	No	720682	5.26541e+11	-5.86369	14.36	6.99	2.15853	45.1108	20.8989	112.597	0	1.53846	0.192308	2.30769	6.73077	123.462	7.30769	1.34615	3.84615	0.961538	76.7308	414.808	0	0	0	0	0	0	0	0	0	0	0	0	0	0	0	0	0	0
F19_C7	F19	19	Dairy	Indoor	700	559	0.798571	Red Holstein	4	Procaine benzylpenicillin	627268	3.83495e+11	-5.78631	16.61	7.34	0.968113	19.4864	20.1282	106.004	0	1.59363	0.199203	2.19124	5.77689	88.6454	5.57769	1.19522	4.38247	1.39442	73.506	324.701	0	0	0	0	0	0	0	0	0	0	0	0	0	0	0	0	0	0
F19_C8	F19	19	Dairy	Indoor	700	559	0.798571	Holstein	4	No	876296	4.8415e+11	-5.74233	12.22	6.66	0.832915	17.8616	21.4447	142.731	0	1.28205	0.3663	2.38095	5.86081	86.2637	5.86081	0.732601	4.0293	1.28205	61.5385	315.568	0	0	0	0	0	0	0	0	0	0	0	0	0	0	0	0	0	0
F19_C9	F19	19	Dairy	Indoor	700	559	0.798571	Holstein	4	Procaine benzylpenicillin	740129	3.96896e+11	-5.72937	14.27	6.69	2.00421	45.4803	22.6924	134.901	0	1.02459	0.204918	2.2541	6.35246	78.0738	6.7623	1.22951	4.5082	1.02459	50.6148	323.156	0	0	0	0	0	0	0	0	0	0	0	0	0	0	0	0	0	0
F20_C1	F20	22	Dairy	Outdoor/Indoor	130	412	3.16923	Jersey	5	No	718248	3.33316e+11	-5.66658	14.6047	6.6	2.30466	44.027	19.1035	112.334	0	0.961538	0.192308	0.961538	1.34615	87.5	4.42308	0.769231	4.03846	0.576923	54.4231	255	0	0	0	0	0	0	0	0	0	0	0	0	0	0	0	0	0	0
F20_C2	F20	22	Dairy	Outdoor/Indoor	130	412	3.16923	Jersey	4	No	7.61064e+06	2.49681e+11	-4.51596	11.9931	6.73	2.06067	43.7137	21.2133	102.07	0	0.585938	0.195312	1.17188	1.36719	58.2031	4.49219	0.78125	4.10156	0.976562	64.2578	244.336	0	0	0	0	0	0	0	0	0	0	0	0	0	0	0	0	0	0
F20_C3	F20	22	Dairy	Outdoor/Indoor	130	412	3.16923	Jersey	4	No	774500	1.77152e+11	-5.35933	13.4524	6.72	2.82497	43.5246	15.4071	145.589	0	1.02389	0.341297	1.19454	1.70648	75.5973	5.2901	0.682594	3.58362	1.02389	80.3754	314.334	0	0	0	0	0	0	0	0	0	0	0	0	0	0	0	0	0	0
F20_C4	F20	22	Dairy	Outdoor/Indoor	130	412	3.16923	Jersey	3	Ampicillin, Dicloxacillin, Sulfadoxine+Trimethoprim	476259	1.48009e+11	-5.49244	22.1763	6.84	2.33338	42.9488	18.4063	119.864	0	0.625	0.208333	1.04167	1.45833	65.625	4.79167	1.25	4.58333	0.625	68.75	269.375	0	0	0	0	0	0	0	0	0	0	0	0	0	0	0	0	0	0
F20_C5	F20	22	Dairy	Outdoor/Indoor	130	412	3.16923	Jersey	3	Ceftiofur (3rd generation cephalosporin)	751188	2.11294e+11	-5.44914	14.0599	7.43	1.5697	44.9295	28.6229	74.2415	0	0.996016	0.398406	1.59363	3.18725	79.4821	5.17928	1.79283	3.98406	0.398406	70.3187	261.753	0	0	0	0	0	0	0	0	0	0	0	0	0	0	0	0	0	0
F20_C6	F20	22	Dairy	Outdoor/Indoor	130	412	3.16923	Jersey	2	Cefapirin (1st generation cephalosporin)	766549	2.10779e+11	-5.43929	13.592	6.9	2.42325	44.2152	18.2462	130.233	0	0.760456	0.190114	0.95057	1.3308	71.673	4.37262	0.95057	3.9924	0.760456	63.1179	287.452	0	0	0	0	0	0	0	0	0	0	0	0	0	0	0	0	0	0
F23_C1	F23	16	Dairy	Indoor	440	4226	9.60455	Holstein	8	Cefquinome (4th generation cephalosporin)	903238	4.23387e+11	-5.67094	11.5351	6.62	1.75535	44.0977	25.1219	123.809	0	0.883392	0.176678	1.23675	1.41343	58.3039	3.88693	0.883392	4.0636	1.06007	48.9399	247.35	0	0	0	0	0	0	0	0	0	0	0	0	0	0	0	0	0	0
F23_C2	F23	16	Dairy	Indoor	440	4226	9.60455	Holstein	6	Enrofloxacin	635465	3.74536e+11	-5.7704	16.2857	6.82	2.61038	43.508	16.6673	172.951	0	0.362319	0.362319	1.44928	1.26812	57.971	4.71014	0.905797	3.80435	0.543478	60.8696	274.457	0	0	0	0	0	0	0	0	0	274.819	0	0	0	0	0	0	0	0
F23_C3	F23	16	Dairy	Indoor	440	4226	9.60455	Holstein	4	No	6.51474e+06	4.12843e+11	-4.80189	14.2012	6.77	2.45236	43.9477	17.9206	129.957	0	0.398406	0.199203	1.19522	1.39442	87.251	4.38247	0.996016	4.38247	1.19522	74.9004	254.98	0	0	0	0	0	0	0	0	0	0	0	0	0	0	0	0	0	0
F23_C4	F23	16	Dairy	Indoor	440	4226	9.60455	Holstein	3	No	837273	4.13294e+11	-5.69339	12.278	6.63	1.92595	44.0446	22.869	118.954	0	0.393701	0.19685	0.984252	0.984252	43.8976	3.14961	0.590551	3.74016	0.393701	54.1339	179.331	0	0	0	0	0	0	0	0	0	0	0	0	0	0	0	0	0	0
F23_C5	F23	16	Dairy	Indoor	440	4226	9.60455	Holstein	3	No	780802	2.23626e+11	-5.45698	13.4347	6.51	2.49477	42.3727	16.9846	113.844	0	0.592885	0.197628	0.988142	0.988142	41.6996	2.96443	0.592885	3.75494	0.395257	51.581	181.621	0	0	0	0	0	0	0	0	0	0	0	0	0	0	0	0	0	0
F23_C6	F23	16	Dairy	Indoor	440	4226	9.60455	Braunvieh	3	Chlortetracycline	911083	3.83849e+11	-5.6246	11.5924	6.51	2.37575	43.705	18.3963	131.415	0	0.843882	0.21097	1.47679	1.26582	60.5485	4.21941	0.843882	4.43038	0.632911	55.6962	248.523	0	0	0	0	0	0	0	0	0	0	0	0	0	0	0	0	0	0
F24_C1	F24	22	Beef	Indoor	9	0	0	Charolais	1	No	823578	4.06197e+11	-5.69303	12.6508	7.92	1.39431	46.8041	33.5679	37.0186	0	1.5625	0.390625	0.390625	2.53906	20.5078	7.22656	1.5625	3.71094	0.976562	59.9609	84.7656	0	0	0	0	0	0	0	0	0	0	0	0	0	0	0	0	0	0
F24_C2	F24	22	Beef	Indoor	9	0	0	Jersey	2	No	722368	3.59044e+11	-5.69639	14.6209	7.75	1.63988	45.4102	27.6911	51.2461	0	0.784314	0.392157	0.392157	3.33333	17.8431	9.01961	2.94118	3.92157	0.784314	88.0392	132.157	0	0	0	0	0	0	0	0	0	0	0	0	0	0	0	0	0	0
F24_C3	F24	22	Beef	Indoor	9	0	0	Charolais	1	No	728538	4.75606e+11	-5.8148	14.3984	8.3	1.49188	45.9161	30.7775	52.2339	0	0.984252	0.393701	0.19685	1.77165	14.1732	3.74016	1.1811	3.74016	0.787402	81.4961	63.5827	0	0	0	0	0	0	0	0	0	0	0	0	0	0	0	0	0	0
F24_C4	F24	22	Beef	Indoor	9	0	0	Charolais	1	No	679223	4.89159e+11	-5.85744	15.3395	8.16	1.43781	47.2641	32.8723	52.4192	0	0.93633	0.187266	0.187266	1.49813	13.6704	3.55805	1.31086	3.74532	0.749064	83.3333	61.6105	0	0	0	0	0	0	0	0	0	0	0	0	0	0	0	0	0	0
F24_C5	F24	22	Beef	Indoor	9	0	0	Charolais	1	No	740216	3.86125e+11	-5.71737	14.2683	7.8	1.69715	46.3458	27.308	58.5046	0	0.965251	0.19305	0.3861	1.9305	15.0579	3.66795	1.1583	3.66795	0.965251	85.3282	57.529	0	0	0	0	0	0	0	0	0	0	0	0	0	0	0	0	0	0
F25_C1	F25	15	Dairy	Outdoor/Indoor	250	59	0.236	Charolais	14	No	838997	2.7315e+11	-5.51264	12.4183	6.84	1.66332	42.958	25.8267	88.7501	0	1.32576	0.189394	0.568182	1.70455	20.2652	3.59848	1.32576	-0.757576	-0.189394	41.6667	69.5076	0	0	0	0	0	0	0	0	0	0	0	0	0	0	0	0	0	0
F25_C2	F25	15	Dairy	Outdoor/Indoor	250	59	0.236	Charolais	13	No	8.0457e+06	2.87699e+11	-4.55337	11.4212	7.24	1.79648	42.4536	23.6315	69.2494	0	1.02215	0.170358	1.02215	1.87394	40.8859	3.40716	1.1925	-0.851789	0.170358	45.3152	120.273	0	0	0	0	0	0	0	0	0	0	0	0	0	0	0	0	0	0
F25_C3	F25	15	Dairy	Outdoor/Indoor	250	59	0.236	Charolais	5	No	6.9729e+06	3.4507e+11	-4.69449	13.4511	7	1.78197	43.1456	24.2123	49.6687	0	0.877193	0.175439	0.701754	1.92982	27.3684	3.85965	1.22807	-0.701754	0	45.614	84.9123	0	0	0	0	0	0	0	0	0	0	0	0	0	0	0	0	0	0
F25_C4	F25	15	Dairy	Outdoor/Indoor	250	59	0.236	Charolais	4	No	8.88591e+06	2.77673e+11	-4.49483	10.2719	7.13	1.38	43.1234	31.2489	56.9127	0	0.724638	0.362319	0.905797	2.17391	34.6014	3.44203	1.08696	3.98551	0	47.6449	108.333	0	0	0	0	0	0	0	0	0	0	0	0	0	0	0	0	0	0
F25_C5	F25	15	Dairy	Outdoor/Indoor	250	59	0.236	Charolais	2	No	8.19334e+06	2.70929e+11	-4.51939	11.2154	7.22	2.17854	39.3242	18.0507	59.9255	0	0.568182	0.189394	1.13636	1.70455	70.2652	2.65152	0.757576	4.35606	0.757576	64.9621	277.273	0	0	0	0	0	0	0	0	0	0	0	0	0	0	0	0	0	0
F25_C6	F25	15	Dairy	Outdoor/Indoor	250	59	0.236	Charolais	2	No	3629732392	1.61317e+11	-1.6478	13.095	7.4	1.39787	43.8622	31.3779	37.0337	0	1.40598	0.351494	0.878735	2.46046	27.065	4.04218	1.93322	-0.702988	0.351494	52.7241	87.1705	0	0	0	0	0	0	0	0	0	0	0	0	0	0	0	0	0	0
F25_C7	F25	15	Dairy	Outdoor/Indoor	250	59	0.236	Charolais	2	No	7.20516e+06	3.25594e+11	-4.65503	12.7536	6.89	1.65271	44.1217	26.6965	75.9678	0	1.34454	0.336134	1.34454	2.85714	53.9496	3.52941	1.68067	-1.0084	0.840336	54.6218	155.294	0	0	0	0	0	0	0	0	0	0	0	0	0	0	0	0	0	0
F28_C1	F28	19	Dairy	Indoor	200	264	1.32	Holstein	7	No	762884	4.92865e+11	-5.81027	14.0366	6.92	1.97812	43.4353	21.9579	77.8552	0	1.19048	0.198413	0.595238	1.98413	40.0794	2.57937	0.793651	3.76984	0.793651	62.1032	151.984	0	0	0	0	0	0	0	0	0	0	0	0	0	0	0	0	0	0
F28_C2	F28	19	Dairy	Indoor	200	264	1.32	Holstein	6	No	2.06437e+07	3.88101e+11	-4.27416	14.3227	6.91	1.82804	42.8148	23.4211	95.3344	0	0.612245	0.204082	0.612245	2.04082	41.8367	2.85714	0.816327	4.08163	1.02041	77.1429	178.571	0	0	0	0	0	0	0	0	0	0	0	0	0	0	0	0	0	0
F28_C3	F28	19	Dairy	Indoor	200	264	1.32	Holstein	4	No	3.91614e+07	4.84418e+11	-4.09236	14.5251	6.77	2.04832	43.0749	21.0294	107.28	0	0.896057	0.179211	0.716846	1.97133	49.2832	2.68817	0.896057	3.40502	1.07527	55.914	179.57	0	0	0	0	0	0	0	0	0	0	0	0	0	0	0	0	0	0
F28_C4	F28	19	Dairy	Indoor	200	264	1.32	Holstein	4	No	7.63653e+07	4.41117e+11	-3.76166	11.4812	6.98	2.11518	43.0041	20.3312	62.5498	0	0.892857	0.178571	0.178571	1.42857	12.5	2.85714	1.07143	3.57143	0.714286	73.3929	43.3929	0	0	0	0	0	0	0	0	0	0	0	0	0	0	0	0	0	0
F28_C5	F28	19	Dairy	Indoor	200	264	1.32	Holstein	3	No	5.49988e+07	3.82653e+11	-3.84245	12.4155	6.94	1.22249	44.2046	36.1594	61.9441	0	0.841751	0.16835	0.505051	1.6835	42.0875	2.52525	0.841751	3.19865	1.3468	72.5589	144.276	0	0	0	0	0	0	0	0	0	0	0	0	0	0	0	0	0	0
F28_C6	F28	19	Dairy	Indoor	200	264	1.32	Holstein	3	Ceftiofur (3rd generation cephalosporin)	7.21196e+07	4.45756e+11	-3.79104	13.1341	6.91	2.01372	43.0059	21.3565	100.822	0	0.992063	0.198413	0.595238	1.98413	51.3889	2.97619	0.992063	3.76984	1.38889	90.6746	203.968	0	0	0	0	0	0	0	0	0	0	0	0	0	0	0	0	0	0
F28_C7	F28	19	Dairy	Indoor	200	264	1.32	Holstein	2	No	6.89825e+06	3.91678e+11	-4.75419	13.321	6.71	2.07843	42.8474	20.6152	62.4887	0	0.609756	0.203252	0.609756	2.23577	49.7967	2.84553	0.813008	4.06504	1.42276	87.6016	192.276	0	0	0	0	0	0	0	0	0	0	0	0	0	0	0	0	0	0
*Based on total antibiotics used in the farms six months before sampling
**Acinetobacter and total bacterial abundance expressed as 16S rRNA per g dry weight
[truncated: 5 more columns]

## Sheet: Table S4
Table S4	Target analytes and their mass spectrometry settings for antibiotic residue determination in cattle feces. To mitigate matrix effects, standard addition was applied for quantification. The final column presents the concentrations of the three standard addition standards.
Compound	Precursor ion	Quantifier ion	Qualifier ion	Polarity	Cell accelerator voltage (V)	Fragmentor (eV)	Quantifier collision energy (eV)	Qualifier collision energy (eV)	Standard addition concentration (ppb)
Amoxicillin	366.1	114.3	134.2	positive	4	70	20	32	1-5-25
Ampicillin	350.1	106	79.1	positive	4	100	20	60	1-5-25
Cefquinome	529.1	134	396.3	positive	4	85	20	20	1-5-25
Ceftiofur	524	241	126	positive	4	100	20	52	1-5-25
Cephapirin	424.1	292	181	positive	4	125	20	28	1-5-25
Chlortetracycline	479	444.2	462.1	positive	4	95	20	20	10-50-250
Cloxacillin	436.1	178	250.9	positive	4	200	28	36	1-5-25
Dicloxacillin	470.1	160	114	positive	4	100	20	52	1-5-25
Dihydrostreptomycin	584.2	263	246	positive	4	150	32	44	20-100-500
Enrofloxacin	360	316	245	positive	4	105	20	28	1-5-25
Lincomycin	407.2	126.1	359.2	positive	4	100	32	20	1-5-25
Marbofloxacin	363.1	72.1	345.1	positive	4	105	28	20	1-5-25
Novobiocin	613.2	189.1	218.1	positive	4	105	32	20	1-5-25
Oxytetracycline	461.2	426.1	443.1	positive	4	90	20	20	10-50-250
Penethamate	434.2	100	259	positive	4	110	32	20	20-100-500
Penicilin G	335.1	216.6	90.9	positive	4	165	12	56	1.4-7-35
Procaine	237.2	100.1	120	positive	4	75	20	28	1-5-25
Rifaximin	786.4	754.3	151.1	positive	4	155	20	36	1-5-25
Sulfadoxine	311.1	156	92	positive	4	110	20	40	1-5-25
Tylosin	916.5	174.1	101.1	positive	4	175	44	52	1-5-25

## Sheet: Table S5
Table S5 Data on the 284 strains isolated from cattle feces: taxonomy, origin, and antibiotic susceptibility *
Strain no.	Concensus identification †	rpoB identification			MALDI-TOF MS identification				Sample	Farm	Selected at (°C)	Disk diffusion test – inhibition zone diameter (mm)																				MIC (mg/L)	PCR screening for ARGs and LowGC plasmids#
		Species or taxon	% identity to the type or reference strain		First match	Score	Cate- gory	Second match (score)				P	AMP	PRL	KF	SAM	AMC	CAZ	MEM	K	CN	N	S	NA	CIP	TE	RL	W	C	Agar medium		COL	tet(Y)	strA	strB	aadA27	sul1	sul2	blaOXA-58	V2016rep (LowGC plasmid)
ANC 7444	A. amyesii [IL1]	A. amyesii	97.2		A. amyesii	2.3	A		F11_floor	F11	30	12	14	22	17	28	18	19	26	22	21	15	18	21	27	25	28	10	28	MHA		0.25	ND	ND	ND	ND	ND	ND	(-)	(-)
ANC 7568	A. amyesii [IL1]	A. amyesii	100		A. amyesii	2.36	A		F28_floor	F28	30	13	16	17	12	20	20	14	21	21	21	17	18	20	23	21	21	14	21	MHA		0.25	ND	ND	ND	ND	ND	ND	(-)	(-)
ANC 7590	A. amyesii [IL1]	A. amyesii	100		A. amyesii	2.36	A		F02_floor	F02	30	11	18	25	19	29	23	22	30	21	20	14	15	25	29	23	28	11	29	MHA		0.25	ND	ND	ND	ND	ND	ND	(-)	(-)
ANC 7450	A. amyesii [IL2]	A. amyesii	97.2		A. amyesii	2.22	A		F21_floor	F21	30	9	12	20	17	27	17	17	25	22	21	15	17	20	26	22	27	10	28	MHA		0.25	ND	ND	ND	ND	ND	ND	(-)	(-)
ANC 7567	A. amyesii [IL2]	A. amyesii	100		A. amyesii	2.26	A		F28_floor	F28	30	11	12	17	12	22	19	14	21	21	20	17	17	20	25	22	20	11	22	MHA		0.25	ND	ND	ND	ND	ND	ND	(-)	(-)
ANC 7476	A. baumannii [IL1]	A. baumannii/A. nosocomialis	98.9/96.3		A. baumannii	2.54	B	A. nosocomialis (2.13)	F15_floor	F15	30	6	6	22	6	27	14	18	19	20	18	15	15	18	24	20	17	16	6	MHA		2	ND	ND	ND	ND	ND	ND	(-)	(-)
ANC 7887	A. baumannii [IL1]	A. baumannii/A. nosocomialis	98.3/96.3		A. baumannii	2.52	B	A. nosocomialis (2.13)	F16_floor	F16	44	6	6	24	6	28	18	20	27	23	23	17	17	21	26	21	16	13	6	MHA		1	ND	ND	ND	ND	ND	ND	(-)	(-)
ANC 7915	A. baumannii [IL1]	A. baumannii/A. nosocomialis	98.3/96.3		A. baumannii	2.52	A		F08_floor	F08	44	6	6	23	6	30	17	22	28	25	24	17	18	20	26	18	23	15	6	MHA		2	ND	ND	ND	ND	ND	ND	(-)	(-)
ANC 7916	A. baumannii [IL1]	A. baumannii/A. nosocomialis	98.9/96.3		A. baumannii	2.64	B	A. nosocomialis (2.09)	F08_floor	F08	44	6	6	26	6	34	19	24	>30	25	25	19	19	23	24	22	30	22	6	MHA		1	ND	ND	ND	ND	ND	ND	(-)	(-)
ANC 7928	A. baumannii [IL1]	A. baumannii/A. nosocomialis	98.3/96.3		A. baumannii	2.66	B	A. nosocomialis (2.1)	F17_floor	F17	44	6	6	21	6	28	14	22	30	24	22	17	17	17	22	15	18	12	6	MHA		1	ND	ND	ND	ND	ND	ND	(-)	(-)
ANC 7931	A. baumannii [IL1]	A. baumannii/A. nosocomialis	98.3/96.3		A. baumannii	2.47	A		F17_floor	F17	44	6	6	24	6	30	16	23	26	24	22	16	15	24	28	22	20	13	9	MHA		1	ND	ND	ND	ND	ND	ND	(-)	(-)
ANC 7942	A. baumannii [IL1]	A. baumannii/A. nosocomialis	99.2/96.1		A. baumannii	2.48	A		F28_floor	F28	44	6	6	24	6	29	17	22	30	25	23	18	18	23	29	22	18	17	8	MHA		1	ND	ND	ND	ND	ND	ND	(-)	(-)
ANC 7953	A. baumannii [IL1]	A. baumannii/A. nosocomialis	98.9/95.8		A. baumannii	2.33	B	A. oleivorans (2.01)	F05_floor	F05	44	6	6	24	6	29	16	22	30	22	19	15	7	24	29	21	22	15	6	MHA		1	ND	(-)	(-)	(-)	ND	ND	(-)	(-)
ANC 7954	A. baumannii [IL1]	A. baumannii/A. nosocomialis	98.3/95.8		A. baumannii	2.55	B	A. nosocomialis (2.22)	F05_floor	F05	44	6	6	26	6	>30	17	24	30	24	24	17	17	25	>30	23	29	17	8	MHA		1	ND	ND	ND	ND	ND	ND	(-)	(-)
ANC 7477	A. baumannii [IL3]	A. baumannii/A. nosocomialis	98.3/96.9		A. baumannii	2.58	B	A. nosocomialis (2.19)	F15_floor	F15	30	6	6	22	6	25	15	17	20	19	17	13	13	20	22	18	19	13	6	MHA		1	ND	ND	ND	ND	ND	ND	(-)	(-)
ANC 7884	A. baumannii [IL1]	A. baumannii/A. nosocomialis	98.9/96.3		A. baumannii	2.52	B	A. nosocomialis (2.22)	F16_floor	F16	30	6	10	23	6	30	20	21	27	23	22	17	17	24	25	23	18	15	6	MHA		1	ND	ND	ND	ND	ND	ND	(-)	(-)
ANC 7918	A. baumannii [IL3]	A. baumannii/A. nosocomialis	98.3/96.9		A. baumannii	2.56	B	A. nosocomialis (2.14)	F08_floor	F08	44	6	6	23	6	27	17	21	25	25	20	15	17	19	24	16	21	14	6	MHA		1	ND	ND	ND	ND	ND	ND	(-)	(-)
ANC 7930	A. baumannii [IL3]	A. baumannii/A. nosocomialis	98.0/96.1		A. baumannii	2.46	B	A. nosocomialis (2.06)	F17_floor	F17	44	6	6	24	6	30	17	22	29	24	22	16	16	24	30	23	26	17	9	MHA		1	ND	ND	ND	ND	ND	ND	(-)	(-)
ANC 7636	A. beijerinckii [IL1]	A. beijerinckii	99.2		A. beijerinckii	2.32	A		F14_floor	F14	30	6	12	22	6	28	23	20	26	22	20	15	18	18	23	19	26	7	20	MHA		0.5	ND	ND	ND	ND	ND	ND	(-)	(-)
ANC 7420	A. faecalis [IL1]	A. faecalis	100		A. faecalis	2.77	B	Taxon 7506 (2.06)	F20_floor	F20	30	18	20	26	20	33	28	23	30	27	24	19	21	22	32	24	29	13	24	MHA		<0.25	ND	ND	ND	ND	ND	ND	(-)	(-)
ANC 7421	A. faecalis [IL1]	A. faecalis	100		A. faecalis	2.76	A		F20_floor	F20	30	18	24	27	19	33	30	23	34	30	28	20	24	22	34	24	30	10	26	MHA		<0.25	ND	ND	ND	ND	ND	ND	(-)	(-)
ANC 7422	A. faecalis [IL1]	A. faecalis	100		A. faecalis	2.7	A		F20_floor	F20	30	23	24	22	16	>30	>30	22	30	25	27	20	21	23	28	29	28	6	27	MHA		<0.25	ND	ND	ND	ND	ND	ND	(-)	(-)
ANC 7483	A. faecalis [IL1]	A. faecalis	100		A. faecalis	2.68	A		F15_floor	F15	30	22	27	28	19	31	26	24	34	30	27	21	12	21	33	28	30	11	31	MHA		0.25	ND	(-)	(-)	aadA27	ND	ND	(-)	(-)
ANC 7484	A. faecalis [IL1]	A. faecalis	100		A. faecalis	2.6	A		F15_floor	F15	30	15	19	25	18	30	28	21	32	30	28	22	16	20	32	24	29	11	30	MHA		0.25	ND	(-)	(-)	aadA27	ND	ND	(-)	(-)
ANC 7485	A. faecalis [IL1]	A. faecalis	100		A. faecalis	2.68	B	Taxon 7506 (2.07)	F05_floor	F05	30	19	25	25	16	29	29	22	31	29	26	19	12	19	31	24	27	9	30	MHA		0.25	ND	(-)	(-)	aadA27	ND	ND	(-)	(-)
ANC 7486	A. faecalis [IL1]	A. faecalis	100		A. faecalis	2.71	A		F05_floor	F05	30	19	23	24	18	31	28	21	27	27	23	18	9	20	31	24	6	7	28	MHA		0.25	ND	strA	strB	(-)	(-)	sul2	(-)	(-)
ANC 7507	A. faecalis [IL1]	A. faecalis	99.7		A. faecalis	2.67	B	Taxon 7506 (2.1)	F26_floor	F26	30	22	27	28	22	33	29	24	30	30	28	21	24	22	33	26	34	16	29	MHA		0.25	ND	ND	ND	ND	ND	ND	(-)	(-)
ANC 7520	A. faecalis [IL1]	A. faecalis	99.7		A. faecalis	2.64	A		F18_floor	F18	30	13	19	25	18	31	26	22	30	26	25	18	23	19	30	23	23	7	25	MHA		0.25	ND	ND	ND	ND	ND	ND	(-)	(-)
ANC 7521	A. faecalis [IL1]	A. faecalis	99.7		A. faecalis	2.59	A		F18_floor	F18	30	14	18	25	17	31	25	21	28	26	24	18	20	17	29	22	30	10	25	MHA		0.25	ND	ND	ND	ND	ND	ND	(-)	(-)
ANC 7618	A. faecalis [IL1]	A. faecalis	99.7		A. faecalis	2.57	A		F24_floor	F24	30	20	26	24	21	32	28	23	30	28	25	19	22	20	31	25	27	10	29	MHA		<0.25	ND	ND	ND	ND	ND	ND	(-)	(-)
ANC 7652	A. faecalis [IL1]	A. faecalis	99.7		A. faecalis	2.66	A		F10_floor	F10	30	17	21	25	17	31	28	21	28	26	24	18	21	19	28	23	26	6	27	MHA		<0.25	ND	ND	ND	ND	ND	ND	(-)	(-)
ANC 7718	A. faecalis [IL1]	A. faecalis	99.7		A. faecalis	2.66	A		F27_floor	F27	30	12	18	25	14	30	28	19	29	22	20	19	18	19	30	22	23	6	21	MHA		0.25	ND	ND	ND	ND	ND	ND	(-)	(-)
ANC 7419	A. gandensis [IL1]	A. gandensis	100		A. gandensis	2.41	A		F20_floor	F20	30	16	19	23	11	28	21	20	29	23	21	15	6	20	28	25	29	13	27	MHA		0.25	ND	(-)	(-)	(-)	ND	ND	(-)	(-)
ANC 7449	A. gandensis [IL1]	A. gandensis	98		A. gandensis	2.47	A		F21_floor	F21	30	16	22	22	15	28	27	18	27	22	20	15	17	21	30	24	25	12	29	MHA		0.25	ND	ND	ND	ND	ND	ND	(-)	(-)
ANC 7482	A. gandensis [IL1]	A. gandensis	97.5		A. gandensis	2.49	A		F15_floor	F15	30	13	15	23	6	24	20	14	25	23	20	17	19	22	22	21	22	6	23	MHA		0.25	ND	ND	ND	ND	ND	ND	(-)	(-)
ANC 7487	A. gandensis [IL1]	A. gandensis	97.7		A. gandensis	2.45	A		F05_floor	F05	30	12	17	20	6	25	21	16	29	23	22	17	11	24	28	23	29	13	27	MHA		0.25	ND	strA	strB	(-)	ND	ND	(-)	(-)
ANC 7488	A. gandensis [IL1]	A. gandensis	97.7		A. gandensis	2.51	A		F05_floor	F05	30	12	16	20	10	23	18	15	26	21	20	14	6	17	22	22	26	11	24	MHA		0.25	ND	strA	strB	(-)	ND	ND	(-)	(-)
ANC 7489	A. gandensis [IL1]	A. gandensis	97.7		A. gandensis	2.55	A		F05_floor	F05	30	12	17	19	10	23	20	16	24	19	18	14	6	17	25	21	25	12	26	MHA		0.25	ND	strA	strB	(-)	ND	ND	(-)	(-)
ANC 7557	A. gandensis [IL1]	A. gandensis	97.7		A. gandensis	2.48	A		F03_floor	F03	30	12	18	20	7	22	21	15	28	24	22	17	19	20	26	24	26	12	27	MHA		0.25	ND	ND	ND	ND	ND	ND	(-)	(-)
ANC 7558	A. gandensis [IL1]	A. gandensis	100		A. gandensis	2.47	A		F03_floor	F03	30	12	16	18	9	22	19	16	27	19	18	13	6	21	24	22	24	16	25	MHA		0.25	ND	(-)	(-)	aadA27	ND	ND	(-)	(-)
ANC 7559	A. gandensis [IL1]	A. gandensis	97.7		A. gandensis	2.48	A		F03_floor	F03	30	13	17	19	6	24	22	14	25	23	21	16	14	21	22	22	20	6	22	MHA		0.25	ND	ND	ND	ND	ND	ND	(-)	(-)
ANC 7614	A. gandensis [IL1]	A. gandensis	97.7		A. gandensis	2.46	A		F24_floor	F24	30	13	18	23	7	28	21	16	30	24	21	16	18	23	29	24	30	11	30	MHA		0.25	ND	ND	ND	ND	ND	ND	(-)	(-)
ANC 7630	A. gandensis [IL1]	A. gandensis	97.7		A. gandensis	2.57	A		F14_floor	F14	30	14	18	21	10	22	22	17	25	20	19	15	15	19	23	22	23	12	26	MHA		0.25	ND	ND	ND	ND	ND	ND	(-)	(-)
ANC 7651	A. gandensis [IL1]	A. gandensis	97.7		A. gandensis	2.51	A		F10_floor	F10	30	13	19	21	10	24	22	16	25	22	20	15	17	21	24	24	30	12	28	MHA		0.25	ND	ND	ND	ND	ND	ND	(-)	(-)
ANC 7675	A. gandensis [IL1]	A. gandensis	100		A. gandensis	2.52	A		F13_floor	F13	30	14	17	20	6	20	21	15	22	19	22	17	17	21	24	22	26	14	24	MHA		<0.25	ND	ND	ND	ND	ND	ND	(-)	(-)
ANC 7686	A. gandensis [IL1]	A. gandensis	100		A. gandensis	2.46	A		F17_floor	F17	30	14	18	19	9	26	21	17	26	21	20	15	18	20	27	24	28	13	28	MHA		0.25	ND	ND	ND	ND	ND	ND	(-)	(-)
ANC 7742	A. gandensis [IL1]	A. gandensis	97.5		A. gandensis	2.52	A		F07_floor	F07	30	13	20	24	6	28	25	16	28	24	22	18	20	21	24	25	27	29	24	MHA		0.25	ND	ND	ND	ND	ND	ND	(-)	(-)
ANC 7749	A. gandensis [IL1]	A. gandensis	97.7		A. gandensis	2.51	A		F08_floor	F08	30	13	18	20	9	26	23	18	26	22	21	16	18	22	28	25	31	12	32	MHA		0.25	ND	ND	ND	ND	ND	ND	(-)	(-)
ANC 7750	A. gandensis [IL1]	A. gandensis	99.2		A. gandensis	2.46	A		F08_floor	F08	30	12	16	19	8	23	21	18	27	22	20	16	17	20	26	25	27	11	26	MHA		0.25	ND	ND	ND	ND	ND	ND	(-)	(-)
ANC 7869	A. gandensis [IL1]	A. gandensis	97.7		A. gandensis	2.33	A		F12_floor	F12	30	14	20	22	7	30	25	19	29	26	24	18	20	24	33	28	34	10	31	MHA		0.25	ND	ND	ND	ND	ND	ND	(-)	(-)
ANC 7620	A. guillouiae [IL1]	A. guillouiae	98.6		A. guillouiae	2.45	B	A. nematophilus (2.05)	F24_floor	F24	30	6	6	19	6	25	11	20	19	26	20	19	22	18	24	20	26	6	29	MHA		1	ND	ND	ND	ND	ND	ND	(-)	(-)
ANC 7560	A. haemolyticus [IL1]	A. haemolyticus	100		A. haemolyticus	2.43	A		F28_floor	F28	30	10	20	29	6	35	24	27	30	19	21	16	19	25	29	21	20	6	14	MHA		1	ND	ND	ND	ND	ND	ND	(-)	(-)
ANC 7459	A. indicus ‡	A. indicus	95.5		A. indicus	2.4	A		F21_floor	F21	30	6	23	23	17	26	27	23	32	26	27	21	25	22	26	24	22	14	27	MHA		<0.25	ND	ND	ND	ND	ND	ND	(-)	(-)
ANC 7388	A. indicus [IL1]	A. indicus	99.7		A. indicus	2.55	A		F25_floor	F25	30	19	24	24	16	29	>30	28	>30	28	28	21	25	29	>30	23	22	17	26	MHA		0.25	ND	ND	ND	ND	ND	ND	(-)	(-)
ANC 7389	A. indicus [IL1]	A. indicus	97.5		A. indicus	2.42	A		F25_floor	F25	30	21	25	25	10	32	29	22	29	24	23	16	19	23	28	24	26	12	29	MHA		0.25	ND	ND	ND	ND	ND	ND	(-)	(-)
ANC 7396	A. indicus [IL1]	A. indicus	97.7		A. indicus	2.4	A		F09_floor	F09	30	22	26	25	18	27	28	21	28	22	20	16	17	22	27	22	24	15	24	MHA		<0.25	ND	ND	ND	ND	ND	ND	(-)	(-)
ANC 7397	A. indicus [IL1]	A. indicus	97.5		A. indicus	2.36	A		F09_floor	F09	30	20	21	20	16	24	26	27	>30	21	26	20	24	22	22	21	18	12	25	MHA		0.25	ND	ND	ND	ND	ND	ND	(-)	(-)
ANC 7415	A. indicus [IL1]	A. indicus	97.4		A. indicus	2.4	A		F23_floor	F23	30	21	25	25	18	29	27	22	30	22	21	15	6	23	27	22	21	11	30	MHA		<0.25	ND	strA	strB	(-)	ND	ND	(-)	(-)
ANC 7416	A. indicus [IL1]	A. indicus	97.5		A. indicus	2.36	A		F23_floor	F23	30	18	24	24	18	29	28	22	31	22	21	15	6	22	27	24	6	14	30	MHA		<0.25	ND	strA	strB	(-)	(-)	sul2	(-)	(-)
ANC 7417	A. indicus [IL1]	A. indicus	97.2		A. indicus	2.36	A		F23_floor	F23	30	17	20	20	15	28	22	16	25	20	22	18	18	24	27	23	18	14	31	MHA		<0.25	ND	ND	ND	ND	ND	ND	(-)	(-)
ANC 7418	A. indicus [IL1]	A. indicus	97.7		A. indicus	2.36	A		F20_floor	F20	30	18	20	20	16	24	22	22	27	25	27	21	13	24	28	24	24	16	30	MHA		<0.25	ND	ND	ND	ND	ND	ND	(-)	(-)
ANC 7436	A. indicus [IL1]	A. indicus	97.5		A. indicus	2.45	A		F11_floor	F11	30	28	28	28	22	34	36	23	>30	25	27	21	26	25	32	25	>30	17	36	MHA		0.25	ND	ND	ND	ND	ND	ND	(-)	(-)
ANC 7460	A. indicus [IL1]	A. indicus	97.2		A. indicus	2.42	A		F21_floor	F21	30	17	21	19	16	22	25	24	32	26	26	21	24	20	25	24	16	12	28	MHA		<0.25	ND	ND	ND	ND	ND	ND	(-)	(-)
ANC 7461	A. indicus [IL1]	A. indicus	97.5		A. indicus	2.44	A		F21_floor	F21	30	16	17	19	15	24	20	15	22	20	21	19	20	19	21	19	18	14	22	MHA		<0.25	ND	ND	ND	ND	ND	ND	(-)	(-)
ANC 7462	A. indicus [IL1]	A. indicus	98.6		A. indicus	2.3	A		F21_floor	F21	30	13	18	24	7	29	23	18	30	24	22	16	17	22	27	27	31	13	30	MHA		<0.25	ND	ND	ND	ND	ND	ND	(-)	(-)
ANC 7463	A. indicus [IL1]	A. indicus	97.4		A. indicus	2.36	A		F21_floor	F21	30	21	25	24	18	30	28	23	32	22	21	16	18	23	28	26	25	14	27	MHA		<0.25	ND	ND	ND	ND	ND	ND	(-)	(-)
ANC 7478	A. indicus [IL1]	A. indicus	97.5		A. indicus	2.48	A		F15_floor	F15	30	19	23	24	20	28	28	23	32	22	21	16	7	23	27	22	23	16	29	MHA		<0.25	ND	strA	strB	(-)	ND	ND	(-)	(-)
ANC 7549	A. indicus [IL1]	A. indicus	97.7		A. indicus	2.31	A		F03_floor	F03	30	22	26	25	19	29	28	25	31	24	23	17	20	22	29	24	28	13	31	MHA		<0.25	ND	ND	ND	ND	ND	ND	(-)	(-)
ANC 7550	A. indicus [IL1]	A. indicus	97.7		A. indicus	2.35	A		F03_floor	F03	30	13	17	23	18	25	26	18	27	20	18	14	16	20	22	21	26	12	28	MHA		<0.25	ND	ND	ND	ND	ND	ND	(-)	(-)
ANC 7569	A. indicus [IL1]	A. indicus	97.5		A. indicus	2.41	A		F28_floor	F28	30	19	26	25	19	28	26	22	31	22	19	14	10	22	27	22	28	17	31	MHA		<0.25	ND	strA	strB	(-)	ND	ND	(-)	(-)
ANC 7570	A. indicus [IL1]	A. indicus	97.7		A. indicus	2.4	A		F28_floor	F28	30	18	17	17	15	25	25	18	30	22	23	18	19	21	22	23	6	13	29	MHA		0.25	ND	ND	ND	ND	(-)	(-)	(-)	(-)
ANC 7621	A. indicus [IL1]	A. indicus	97.5		A. indicus	2.33	A		F24_floor	F24	30	18	21	19	17	23	23	20	26	21	22	20	20	19	21	21	15	15	28	MHA		0.25	ND	ND	ND	ND	ND	ND	(-)	(-)
ANC 7622	A. indicus [IL1]	A. indicus	97.4		A. indicus	2.33	A		F24_floor	F24	30	17	21	18	15	20	23	18	27	24	24	21	21	20	23	22	16	13	26	MHA		<0.25	ND	ND	ND	ND	ND	ND	(-)	(-)
ANC 7663	A. indicus [IL1]	A. indicus	97.5		A. indicus	2.4	A		F06_floor	F06	30	22	27	29	20	>30	>30	28	>30	28	26	23	15	27	>30	32	34	18	>30	MHA		<0.25	ND	ND	ND	ND	ND	ND	(-)	(-)
ANC 7664	A. indicus [IL1]	A. indicus	97.5		A. indicus	2.34	A		F06_floor	F06	30	19	23	21	16	29	28	21	27	25	26	22	12	21	25	23	25	16	26	MHA		<0.25	ND	strA	strB	(-)	ND	ND	(-)	(-)
ANC 7665	A. indicus [IL1]	A. indicus	97.2		A. indicus	2.3	A		F06_floor	F06	30	22	27	26	21	31	31	24	31	23	21	16	6	23	28	24	28	18	31	MHA		<0.25	ND	strA	strB	(-)	ND	ND	(-)	(-)
ANC 7677	A. indicus [IL1]	A. indicus	97.7		A. indicus	2.43	A		F13_floor	F13	30	20	24	23	17	29	27	22	27	21	19	15	8	21	25	22	22	13	27	MHA		<0.25	ND	strA	strB	(-)	ND	ND	(-)	(-)
ANC 7678	A. indicus [IL1]	A. indicus	97.7		A. indicus	2.32	A		F13_floor	F13	30	20	23	21	17	27	25	24	30	24	24	18	21	21	26	21	6	12	26	MHA		<0.25	ND	ND	ND	ND	(-)	(-)	(-)	(-)
ANC 7679	A. indicus [IL1]	A. indicus	97.7		A. indicus	2.39	A		F13_floor	F13	30	21	24	23	18	29	29	24	>30	25	24	20	23	24	>30	23	28	13	25	MHA		<0.25	ND	ND	ND	ND	ND	ND	(-)	(-)
ANC 7687	A. indicus [IL1]	A. indicus	97.5		A. indicus	2.41	A		F17_floor	F17	30	20	23	22	17	27	25	19	24	26	26	20	24	21	28	24	22	14	31	MHA		<0.25	ND	ND	ND	ND	ND	ND	(-)	(-)
ANC 7688	A. indicus [IL1]	A. indicus	97.5		A. indicus	2.35	A		F17_floor	F17	30	19	23	23	18	26	24	20	32	24	25	19	23	26	28	26	25	13	30	MHA		<0.25	ND	ND	ND	ND	ND	ND	(-)	(-)
ANC 7716	A. indicus [IL1]	A. indicus	97.1		A. indicus	2.47	A		F27_floor	F27	30	20	22	22	17	32	26	21	28	22	22	19	12	20	23	25	21	11	28	MHA		0.25	ND	strA	strB	(-)	ND	ND	(-)	(-)
ANC 7717	A. indicus [IL1]	A. indicus	97.4		A. indicus	2.42	A		F27_floor	F27	30	19	24	22	19	30	30	17	28	24	25	21	13	22	26	26	25	16	30	MHA		0.25	ND	ND	ND	ND	ND	ND	(-)	(-)
ANC 7732	A. indicus [IL1]	A. indicus	97.5		A. indicus	2.34	A		F01_floor	F01	30	21	24	22	19	28	28	24	32	28	26	22	20	24	32	30	32	13	24	MHA		1	ND	ND	ND	ND	ND	ND	(-)	(-)
ANC 7733	A. indicus [IL1]	A. indicus	97.7		A. indicus	2.46	A		F01_floor	F01	30	23	27	26	18	31	31	24	30	23	22	17	6	22	30	25	6	10	32	MHA		0.25	ND	strA	strB	(-)	(-)	sul2	(-)	(-)
ANC 7743	A. indicus [IL1]	A. indicus	97.7		A. indicus	2.4	A		F07_floor	F07	30	21	26	25	20	32	30	25	30	23	22	16	6	22	31	25	22	12	31	MHA		0.25	ND	strA	strB	(-)	ND	ND	(-)	(-)
ANC 7744	A. indicus [IL1]	A. indicus	97.5		A. indicus	2.32	A		F07_floor	F07	30	16	19	22	17	27	27	22	28	24	23	20	6	20	23	23	23	12	25	MHA		0.25	ND	strA	strB	(-)	ND	ND	(-)	(-)
ANC 7745	A. indicus [IL1]	A. indicus	99.5		A. indicus	2.4	A		F07_floor	F07	30	21	25	25	17	29	29	25	31	24	24	19	6	20	25	25	25	13	29	MHA		0.25	ND	strA	strB	(-)	ND	ND	(-)	(-)
ANC 7746	A. indicus [IL1]	A. indicus	97.5		A. indicus	2.42	A		F07_floor	F07	30	17	22	22	18	30	29	19	27	23	23	18	18	22	26	23	21	14	26	MHA		<0.25	ND	ND	ND	ND	ND	ND	(-)	(-)
ANC 7747	A. indicus [IL1]	A. indicus	97.7		A. indicus	2.4	A		F08_floor	F08	30	20	24	24	17	30	28	21	29	24	22	17	20	24	29	25	22	12	30	MHA		<0.25	ND	ND	ND	ND	ND	ND	(-)	(-)
ANC 7748	A. indicus [IL1]	A. indicus	97.7		A. indicus	2.34	A		F08_floor	F08	30	22	27	27	22	33	30	25	33	26	24	18	21	24	31	25	28	15	31	MHA		<0.25	ND	ND	ND	ND	ND	ND	(-)	(-)
ANC 7868	A. indicus [IL1]	A. indicus	97.5		A. indicus	2.42	A		F12_floor	F12	30	23	27	24	20	29	31	25	33	26	25	18	20	25	33	28	28	14	34	MHA		0.25	ND	ND	ND	ND	ND	ND	(-)	(-)
ANC 7889	A. indicus [IL1]	A. indicus	97.4		A. indicus	2.32	A		F16_floor	F16	30	29	31	30	26	>30	>30	29	>30	28	28	22	18	24	30	28	29	18	>30	MHA		<0.25	ND	ND	ND	ND	ND	ND	(-)	(-)
ANC 7890	A. indicus [IL1]	A. indicus	97.4		A. indicus	2.32	A		F16_floor	F16	30	20	24	21	19	30	29	24	30	26	23	17	20	24	29	26	31	16	33	MHA		<0.25	ND	ND	ND	ND	ND	ND	(-)	(-)
ANC 7891	A. indicus [IL1]	A. indicus	97.7		A. indicus	2.36	A		F16_floor	F16	30	28	31	30	22	>30	>30	26	>30	27	28	22	12	24	30	28	29	18	>30	MHA		<0.25	ND	strA	strB	(-)	ND	ND	(-)	(-)
ANC 7895	A. indicus [IL1]	A. indicus	97.5		A. indicus	2.31	A		F19_floor	F19	30	23	>30	>30	22	>30	>30	25	>30	27	29	24	12	30	>30	27	30	20	>30	MHA		<0.25	ND	strA	strB	(-)	ND	ND	(-)	(-)
ANC 7896	A. indicus [IL1]	A. indicus	97.5		A. indicus	2.34	A		F19_floor	F19	30	20	>30	>30	23	>30	>30	27	35	29	29	23	14	26	>30	26	30	19	>30	MHA		<0.25	ND	ND	ND	ND	ND	ND	(-)	(-)
ANC 7731	A. indicus [IL2]	A. indicus	97.5		A. indicus	2.29	A		F01_floor	F01	30	21	25	28	17	26	26	21	30	24	22	21	13	24	26	25	23	13	28	MHA		<0.25	ND	ND	ND	ND	ND	ND	(-)	(-)
ANC 7626	A. pecorum [IL1]	A. pecorum/A. lwoffii	98.0/95.5		A. pecorum	2.5	A		F14_floor	F14	30	16	20	20	14	27	23	23	31	24	22	18	20	21	29	27	31	12	33	MHA		<0.25	ND	ND	ND	ND	ND	ND	(-)	(-)
ANC 7627	A. pecorum [IL1]	A. pecorum/A. lwoffii	99.7/96.1		A. pecorum	2.55	A		F14_floor	F14	30	22	26	24	16	27	23	21	30	26	23	19	18	22	25	26	29	7	31	MHA		<0.25	ND	ND	ND	ND	ND	ND	(-)	(-)
ANC 7877	A. pecorum [IL1]	A. pecorum/A. lwoffii	100/96.3		A. pecorum	2.37	A		F04_floor	F04	30	19	21	23	17	27	27	22	30	23	21	17	18	25	26	26	30	7	32	MHA		<0.25	ND	ND	ND	ND	ND	ND	(-)	(-)
ANC 7879	A. pecorum [IL1]	A. pecorum/A. lwoffii	100/96.3		A. pecorum	2.62	A		F04_floor	F04	30	20	21	24	16	26	23	23	31	23	22	17	17	21	27	27	30	10	29	MHA		<0.25	ND	ND	ND	ND	ND	ND	(-)	V216rep
ANC 7880	A. pecorum [IL1]	A. pecorum/A. lwoffii	100/96.3		A. pecorum	2.4	A		F04_floor	F04	30	18	23	23	17	26	20	23	30	23	22	17	18	22	28	27	29	7	32	MHA		<0.25	ND	ND	ND	ND	ND	ND	(-)	(-)
ANC 7386	A. pseudolwoffii [IL1]	A. pseudolwoffii	99.4		A. pseudolwoffii	2.31	A		F25_floor	F25	30	19	23	17	16	23	24	18	22	17	17	14	16	19	20	19	19	14	22	Levinthal		<0.25	ND	ND	ND	ND	ND	ND	(-)	(-)
ANC 7425	A. pseudolwoffii [IL1]	A. pseudolwoffii	98		A. pseudolwoffii	2.48	A		F23_floor	F23	30	17	20	18	16	23	23	16	24	18	18	15	7	19	19	17	20	9	18	Levinthal		<0.25	ND	strA	strB	(-)	ND	ND	(-)	(-)
ANC 7452	A. pseudolwoffii [IL1]	A. pseudolwoffii	99.4		A. pseudolwoffii	2.31	A		F21_floor	F21	30	17	19	17	15	20	22	15	23	16	16	13	14	17	23	16	16	12	19	Levinthal		0.25	ND	ND	ND	ND	ND	ND	(-)	(-)
ANC 7491	A. pseudolwoffii [IL1]	A. pseudolwoffii	99.4		A. pseudolwoffii	2.3	A		F05_floor	F05	30	6	12	16	6	19	18	19	26	18	16	14	10	19	23	10	16	14	18	Levinthal		0.25	ND	strA	strB	(-)	ND	ND	(-)	(-)
ANC 7492	A. pseudolwoffii [IL1]	A. pseudolwoffii	99.4		A. pseudolwoffii	2.36	A		F05_floor	F05	30	6	11	15	6	19	20	18	25	21	18	15	11	18	23	18	20	15	23	Levinthal		0.25	ND	strA	strB	(-)	ND	ND	(-)	(-)
ANC 7493	A. pseudolwoffii [IL1]	A. pseudolwoffii	99.4		A. pseudolwoffii	2.31	A		F05_floor	F05	30	11	12	18	14	26	18	17	22	16	16	13	10	18	23	15	17	14	17	Levinthal		0.25	ND	strA	strB	(-)	ND	ND	blaOXA-58	(-)
ANC 7494	A. pseudolwoffii [IL1]	A. pseudolwoffii	99.4		A. pseudolwoffii	2.38	A		F05_floor	F05	30	18	20	19	17	22	22	19	26	18	18	15	11	18	23	19	22	13	25	Levinthal		0.25	ND	strA	strB	(-)	ND	ND	(-)	(-)
ANC 7566	A. pseudolwoffii [IL1]	A. pseudolwoffii	99.4		A. pseudolwoffii	2.38	A		F28_floor	F28	30	17	20	19	15	23	25	17	24	19	19	15	16	18	22	18	17	11	22	Levinthal		0.25	ND	ND	ND	ND	ND	ND	(-)	(-)
ANC 7599	A. pseudolwoffii [IL1]	A. pseudolwoffii	99.4		A. pseudolwoffii	2.47	A		F22_floor	F22	30	17	18	16	15	17	20	14	24	18	17	13	16	17	21	17	16	11	22	Levinthal		<0.25	ND	ND	ND	ND	ND	ND	(-)	(-)
ANC 7600	A. pseudolwoffii [IL1]	A. pseudolwoffii	99.4		A. pseudolwoffii	2.53	A		F22_floor	F22	30	20	21	19	14	24	20	16	24	18	17	14	16	17	22	18	16	12	23	Levinthal		0.25	ND	ND	ND	ND	ND	ND	(-)	(-)
ANC 7616	A. pseudolwoffii [IL1]	A. pseudolwoffii	99.4		A. pseudolwoffii	2.3	A		F24_floor	F24	30	19	21	22	17	25	22	23	25	19	17	15	15	20	21	17	19	14	19	Levinthal		<0.25	ND	ND	ND	ND	ND	ND	(-)	(-)
ANC 7617	A. pseudolwoffii [IL1]	A. pseudolwoffii	99.4		A. pseudolwoffii	2.3	A		F24_floor	F24	30	19	22	22	18	24	26	18	25	20	19	16	14	20	18	17	20	17	21	Levinthal		<0.25	ND	ND	ND	ND	ND	ND	(-)	(-)
ANC 7661	A. pseudolwoffii [IL1]	A. pseudolwoffii	99.2		A. pseudolwoffii	2.3	A		F06_floor	F06	30	19	23	21	16	24	22	19	26	19	18	16	9	19	23	17	19	18	23	Levinthal		<0.25	ND	strA	strB	(-)	ND	ND	(-)	(-)
ANC 7685	A. pseudolwoffii [IL1]	A. pseudolwoffii	99.4		A. pseudolwoffii	2.37	A		F17_floor	F17	30	17	21	16	15	19	23	17	25	19	18	13	14	19	22	18	16	11	22	Levinthal		<0.25	ND	ND	ND	ND	ND	ND	(-)	(-)
ANC 7721	A. pseudolwoffii [IL1]	A. pseudolwoffii	99.4		A. pseudolwoffii	2.4	A		F27_floor	F27	30	16	21	21	15	21	24	18	27	18	17	14	6	20	18	17	16	15	27	Levinthal		<0.25	ND	strA	strB	(-)	ND	ND	(-)	(-)
ANC 7723	A. pseudolwoffii [IL1]	A. pseudolwoffii	99.4		A. pseudolwoffii	2.35	A		F27_floor	F27	30	13	16	13	18	20	23	14	23	15	15	12	9	14	18	16	14	10	22	Levinthal		<0.25	ND	strA	strB	(-)	ND	ND	(-)	(-)
ANC 7724	A. pseudolwoffii [IL1]	A. pseudolwoffii	99.4		A. pseudolwoffii	2.36	A		F27_floor	F27	30	17	20	20	15	25	24	18	26	20	17	14	13	19	24	20	21	11	19	Levinthal		0.25	ND	ND	ND	ND	ND	ND	(-)	(-)
ANC 7753	A. pseudolwoffii [IL1]	A. pseudolwoffii	99.2		A. pseudolwoffii	2.36	A		F08_floor	F08	30	17	22	19	17	23	26	20	28	20	23	15	6	20	23	23	17	10	26	Levinthal		<0.25	ND	strA	strB	(-)	ND	ND	(-)	(-)
ANC 7754	A. pseudolwoffii [IL1]	A. pseudolwoffii	99.4		A. pseudolwoffii	2.31	A		F08_floor	F08	30	17	20	16	16	21	22	16	24	19	17	13	7	18	22	18	17	9	17	Levinthal		<0.25	ND	(-)	(-)	aadA27	ND	ND	(-)	(-)
ANC 7871	A. pseudolwoffii [IL1]	A. pseudolwoffii	99.4		A. pseudolwoffii	2.31	A		F12_floor	F12	30	16	19	15	13	19	20	17	25	17	16	12	9	18	20	17	6	10	22	Levinthal		<0.25	ND	strA	strB	(-)	(-)	sul2	(-)	(-)
ANC 7872	A. pseudolwoffii [IL1]	A. pseudolwoffii	99.4		A. pseudolwoffii	2.39	A		F12_floor	F12	30	16	18	17	15	20	21	15	24	17	17	14	14	18	17	22	22	11	23	Levinthal		<0.25	ND	ND	ND	ND	ND	ND	(-)	(-)
ANC 7387	A. pseudolwoffii [IL2]	A. pseudolwoffii	99.4		A. pseudolwoffii	2.24	A		F25_floor	F25	30	16	18	18	17	19	18	15	23	20	19	16	16	17	19	18	16	15	23	Levinthal		0.25	ND	ND	ND	ND	ND	ND	(-)	(-)
ANC 7423	A. pseudolwoffii [IL2]	A. pseudolwoffii	99.4		A. pseudolwoffii	2.22	A		F20_floor	F20	30	19	22	18	16	22	23	19	25	17	17	15	15	20	25	18	20	15	20	Levinthal		<0.25	ND	ND	ND	ND	ND	ND	(-)	(-)
ANC 7424	A. pseudolwoffii [IL2]	A. pseudolwoffii	99.4		A. pseudolwoffii	2.26	A		F20_floor	F20	30	19	19	18	15	21	22	18	24	16	16	13	14	17	19	17	6	14	19	Levinthal		<0.25	ND	ND	ND	ND	(-)	(-)	(-)	(-)
ANC 7479	A. pseudolwoffii [IL2]	A. pseudolwoffii	99.4		A. pseudolwoffii	2.23	A		F15_floor	F15	30	13	14	21	16	22	18	19	24	21	20	16	7	20	25	21	18	12	28	Levinthal		0.25	ND	strA	strB	(-)	ND	ND	blaOXA-58	(-)
ANC 7490	A. pseudolwoffii [IL2]	A. pseudolwoffii	99.4		A. pseudolwoffii	2.19	A		F05_floor	F05	30	14	15	21	17	26	17	17	25	19	20	14	7	18	24	18	18	10	25	Levinthal		<0.25	ND	strA	strB	(-)	ND	ND	blaOXA-58	(-)
ANC 7615	A. pseudolwoffii [IL2]	A. pseudolwoffii	99.2		A. pseudolwoffii	2.17	A		F24_floor	F24	30	19	22	20	15	26	21	16	26	20	18	16	18	18	20	18	19	15	18	Levinthal		<0.25	ND	ND	ND	ND	ND	ND	(-)	(-)
ANC 7656	A. pseudolwoffii [IL2]	A. pseudolwoffii	99.4		A. pseudolwoffii	2.18	A		F10_floor	F10	30	16	21	18	14	22	23	16	25	20	18	13	14	18	24	18	19	16	23	Levinthal		<0.25	ND	ND	ND	ND	ND	ND	(-)	(-)
ANC 7674	A. pseudolwoffii [IL2]	A. pseudolwoffii	99.4		A. pseudolwoffii	2.28	A		F13_floor	F13	30	17	19	16	12	22	21	16	23	20	20	14	11	18	25	16	14	12	23	Levinthal		<0.25	ND	strA	strB	(-)	ND	ND	(-)	(-)
ANC 7722	A. pseudolwoffii [IL2]	A. pseudolwoffii	99.4		A. pseudolwoffii	2.23	A		F27_floor	F27	30	19	21	21	19	27	19	15	26	16	16	14	12	19	24	16	16	10	14	Levinthal		<0.25	ND	(-)	(-)	(-)	ND	ND	(-)	(-)
ANC 7755	A. pseudolwoffii [IL2]	A. pseudolwoffii	99.2		A. pseudolwoffii	2.28	A		F08_floor	F08	30	17	19	23	15	20	21	18	25	16	15	14	10	16	20	19	20	13	24	Levinthal		<0.25	ND	strA	strB	(-)	ND	ND	(-)	(-)
ANC 7870	A. pseudolwoffii [IL3]	A. pseudolwoffii/A. lwoffii	97.7/96.1		A. pseudolwoffii	2.39	A		F12_floor	F12	30	17	20	16	14	22	21	17	25	19	18	14	15	17	20	17	18	11	23	Levinthal		<0.25	ND	ND	ND	ND	ND	ND	(-)	(-)
ANC 7619	A. sichuanensis [IL1]	A. sichuanensis	99.2		A. sichuanensis	2.31	A		F24_floor	F24	30	6	11	24	6	25	17	16	22	27	24	18	22	20	24	23	26	10	28	MHA		1	ND	ND	ND	ND	ND	ND	(-)	(-)
ANC 7454	A. thermotolerans [IL1]	A. thermotolerans	Type		A. thermotolerans	Type			F21_floor	F21	30	15	21	21	17	25	20	21	25	21	19	16	16	19	26	24	25	12	26	MHA		<0.25	ND	ND	ND	ND	ND	ND	(-)	(-)
ANC 7455	A. thermotolerans [IL1]	A. thermotolerans	100		A. thermotolerans	2.53	A		F21_floor	F21	30	13	19	18	16	24	>30	17	>30	25	23	21	21	23	28	22	29	6	27	MHA		<0.25	ND	ND	ND	ND	ND	ND	(-)	(-)
ANC 7881	A. thermotolerans [IL1]	A. thermotolerans	99.5		A. thermotolerans	2.49	A		F16_floor	F16	44	18	23	23	21	26	24	23	27	19	17	14	6	20	26	22	24	13	26	MHA		<0.25	ND	strA	strB	(-)	ND	ND	(-)	(-)
ANC 7882	A. thermotolerans [IL1]	A. thermotolerans	100		A. thermotolerans	2.44	A		F16_floor	F16	44	16	20	23	14	25	27	19	31	22	21	17	17	22	30	24	29	17	32	MHA		<0.25	ND	ND	ND	ND	ND	ND	(-)	(-)
ANC 7883	A. thermotolerans [IL1]	A. thermotolerans	100		A. thermotolerans	2.46	A		F16_floor	F16	44	14	19	19	13	25	26	15	25	19	19	17	6	23	32	24	23	12	26	MHA		<0.25	ND	strA	strB	(-)	ND	ND	(-)	(-)
ANC 7892	A. thermotolerans [IL1]	A. thermotolerans	100		A. thermotolerans	2.38	A		F19_floor	F19	44	16	22	22	16	26	24	20	25	21	19	15	16	18	24	23	26	14	28	MHA		<0.25	ND	ND	ND	ND	ND	ND	(-)	(-)
ANC 7893	A. thermotolerans [IL1]	A. thermotolerans	100		A. thermotolerans	2.4	A		F19_floor	F19	44	19	27	27	15	>30	>30	24	>30	22	22	19	19	ND	ND	ND	ND	ND	ND	MHA		<0.25	ND	ND	ND	ND	ND	ND	(-)	(-)
ANC 7894	A. thermotolerans [IL1]	A. thermotolerans	100		A. thermotolerans	2.36	A		F19_floor	F19	44	18	23	29	15	>30	30	22	29	25	25	20	21	24	30	25	25	15	>30	MHA		<0.25	ND	ND	ND	ND	ND	ND	(-)	(-)
ANC 7910	A. thermotolerans [IL1]	A. thermotolerans	100		A. thermotolerans	2.57	A		F27_floor	F27	44	19	26	24	17	>30	>30	23	>30	23	23	18	6	21	>30	>30	>30	14	>30	MHA		0.25	ND	strA	strB	(-)	ND	ND	(-)	(-)
ANC 7912	A. thermotolerans [IL1]	A. thermotolerans	100		A. thermotolerans	2.62	A		F27_floor	F27	44	16	22	23	19	27	26	22	26	18	18	13	6	20	25	23	24	11	26	MHA		0.25	ND	strA	strB	(-)	ND	ND	(-)	(-)
ANC 7914	A. thermotolerans [IL1]	A. thermotolerans	100		A. thermotolerans	2.56	A		F01_floor	F01	44	14	21	19	14	25	24	20	27	18	17	14	14	19	25	23	25	12	27	MHA		<0.25	ND	ND	ND	ND	ND	ND	(-)	(-)
ANC 7919	A. thermotolerans [IL1]	A. thermotolerans	99.7		A. thermotolerans	2.51	A		F07_floor	F07	44	17	22	21	16	26	25	20	28	18	17	14	15	19	26	22	25	13	27	MHA		<0.25	ND	ND	ND	ND	ND	ND	(-)	(-)
ANC 7920	A. thermotolerans [IL1]	A. thermotolerans	99.7		A. thermotolerans	2.51	A		F07_floor	F07	44	19	25	24	18	>30	30	22	>30	25	22	17	19	24	>30	28	>30	17	>30	MHA		<0.25	ND	ND	ND	ND	ND	ND	(-)	(-)
ANC 7921	A. thermotolerans [IL1]	A. thermotolerans	99.7		A. thermotolerans	2.59	A		F07_floor	F07	44	20	26	28	15	>30	>30	23	>30	24	24	19	19	23	>30	26	24	13	>30	MHA		<0.25	ND	ND	ND	ND	ND	ND	(-)	(-)
ANC 7922	A. thermotolerans [IL1]	A. thermotolerans	100		A. thermotolerans	2.48	A		F07_floor	F07	44	17	24	27	15	>30	>30	23	>30	24	25	19	19	21	27	25	27	14	>30	MHA		<0.25	ND	ND	ND	ND	ND	ND	(-)	(-)
ANC 7924	A. thermotolerans [IL1]	A. thermotolerans	100		A. thermotolerans	2.55	A		F13_floor	F13	44	16	20	22	15	26	25	20	26	20	19	16	16	18	21	22	25	13	28	MHA		<0.25	ND	ND	ND	ND	ND	ND	(-)	(-)
ANC 7925	A. thermotolerans [IL1]	A. thermotolerans	100		A. thermotolerans	2.55	A		F13_floor	F13	44	16	19	21	13	>30	>30	17	>30	21	21	16	16	20	20	20	23	6	25	MHA		<0.25	ND	ND	ND	ND	ND	ND	(-)	(-)
ANC 7933	A. thermotolerans [IL1]	A. thermotolerans	100		A. thermotolerans	2.53	A		F17_floor	F17	44	18	24	23	19	25	27	23	27	21	19	16	16	19	27	25	26	14	28	MHA		<0.25	ND	ND	ND	ND	ND	ND	(-)	(-)
ANC 7934	A. thermotolerans [IL1]	A. thermotolerans	99.4		A. thermotolerans	2.47	A		F17_floor	F17	44	17	22	21	18	>30	28	22	>30	23	23	19	19	21	>30	25	24	15	>30	MHA		<0.25	ND	ND	ND	ND	ND	ND	(-)	(-)
ANC 7951	A. thermotolerans [IL1]	A. thermotolerans	100		A. thermotolerans	2.52	A		F21_floor	F21	44	14	20	20	14	25	23	18	24	20	19	15	10	18	23	21	23	12	26	MHA		<0.25	ND	strA	strB	(-)	ND	ND	(-)	(-)
ANC 7955	A. thermotolerans [IL1]	A. thermotolerans	100		A. thermotolerans	2.63	A		F05_floor	F05	44	16	21	23	16	24	22	20	25	19	18	14	6	19	23	6	21	6	24	MHA		2	tet(Y)	strA	strB	(-)	ND	ND	(-)	(-)
ANC 7956	A. thermotolerans [IL1]	A. thermotolerans	100		A. thermotolerans	2.62	A		F05_floor	F05	44	17	21	23	13	25	26	21	>30	22	22	19	19	20	26	25	25	10	>30	MHA		<0.25	ND	ND	ND	ND	ND	ND	(-)	(-)
ANC 7970	A. thermotolerans [IL1]	A. thermotolerans	99.7		A. thermotolerans	2.54	A		F23_floor	F23	44	17	21	23	16	25	24	22	25	21	20	16	12	18	23	21	6	13	25	MHA		<0.25	ND	strA	strB	(-)	(-)	sul2	(-)	(-)
ANC 7974	A. thermotolerans [IL1]	A. thermotolerans	100		A. thermotolerans	2.3	A		F09_floor	F09	44	18	22	21	19	26	27	22	29	20	19	15	14	19	25	23	25	11	26	MHA		<0.25	ND	ND	ND	ND	ND	ND	(-)	(-)
ANC 7725	A. towneri [IL1]	A.towneri	98.9		A. towneri	2.3	A		F01_floor	F01	30	15	18	16	17	23	23	13	27	18	17	14	14	19	25	25	6	6	28	MHA		0.5	ND	ND	ND	ND	(-)	(-)	(-)	(-)
ANC 7392	A. variabilis [IL1]	A. variabilis	98.6		A. variabilis	2.3	A		F09_floor	F09	30	17	22	18	12	23	23	17	24	21	21	16	17	20	24	22	20	6	24	MHA		0.25	ND	ND	ND	ND	ND	ND	(-)	(-)
ANC 7393	A. variabilis [IL1]	A. variabilis	98.6		A. variabilis	2.32	A		F09_floor	F09	30	18	22	25	16	29	25	21	29	25	24	19	21	23	26	25	25	6	28	MHA		<0.25	ND	ND	ND	ND	ND	ND	(-)	(-)
ANC 7395	A. variabilis [IL1]	A. variabilis	98.6		A. variabilis	2.32	A		F09_floor	F09	30	18	23	26	16	28	22	21	27	22	20	16	17	20	26	25	22	6	32	MHA		<0.25	ND	ND	ND	ND	ND	ND	(-)	(-)
ANC 7453	A. variabilis [IL1]	A. variabilis	98.6		A. variabilis	2.39	A		F21_floor	F21	30	16	19	19	12	25	25	18	24	22	21	18	18	20	24	22	21	6	28	MHA		<0.25	ND	ND	ND	ND	ND	ND	(-)	(-)
ANC 7480	A. variabilis [IL1]	A. variabilis	98.6		A. variabilis	2.34	A		F15_floor	F15	30	20	26	24	14	27	26	22	32	26	24	18	11	21	29	27	25	6	30	MHA		0.25	ND	strA	strB	(-)	ND	ND	(-)	(-)
ANC 7481	A. variabilis [IL1]	A. variabilis	98.3		A. variabilis	2.31	A		F15_floor	F15	30	23	27	27	15	18	30	23	21	19	19	17	12	11	21	25	28	6	29	MHA		0.25	ND	strA	strB	(-)	ND	ND	(-)	(-)
ANC 7555	A. variabilis [IL1]	A. variabilis	98.6		A. variabilis	2.36	A		F03_floor	F03	30	18	25	28	21	34	31	23	28	26	24	18	20	21	27	27	28	6	31	MHA		0.25	ND	ND	ND	ND	ND	ND	(-)	(-)
ANC 7719	A. variabilis [IL1]	A. variabilis	98.3		A. variabilis	2.34	A		F27_floor	F27	30	22	27	28	14	31	26	23	32	28	23	18	21	23	30	23	32	6	32	MHA		<0.25	ND	ND	ND	ND	ND	ND	(-)	(-)
ANC 7729	A. variabilis [IL1]	A. variabilis	98.6		A. variabilis	2.39	A		F01_floor	F01	30	14	22	26	10	28	27	22	30	28	24	17	21	22	28	27	29	6	33	MHA		0.25	ND	ND	ND	ND	ND	ND	(-)	(-)
ANC 7684	A. variabilis [IL2]	A. variabilis	98.6		A. variabilis	2.26	A		F17_floor	F17	30	17	24	26	13	28	24	21	30	27	25	20	22	21	29	27	27	6	32	MHA		<0.25	ND	ND	ND	ND	ND	ND	(-)	(-)
ANC 7728	A. variabilis [IL2]	A. variabilis	98.6		A. variabilis	2.21	A		F01_floor	F01	30	16	28	18	14	25	23	18	23	22	21	18	16	19	25	24	25	6	29	MHA		0.25	ND	ND	ND	ND	ND	ND	(-)	V216rep
ANC 7751	A. variabilis [IL2]	A. variabilis	98.6		A. variabilis	2.25	A		F08_floor	F08	30	18	24	28	13	28	26	20	28	25	23	19	24	22	29	27	32	10	29	MHA		<0.25	ND	ND	ND	ND	ND	ND	(-)	(-)
ANC 7390	A. vivianii §	A. vivianii/A. modestus	98.3/96.9		A. vivianii	2.35	B	A. courvalinii (2.27)	F25_floor	F25	30	6	10	22	6	30	17	21	26	21	20	15	14	25	27	21	29	10	16	MHA		1	ND	ND	ND	ND	ND	ND	(-)	(-)
ANC 7475	A. vivianii §	A. vivianii/A. modestus	97.7/97.5		A. courvalinii	2.31	B	A. vivianii (2.22)	F15_floor	F15	30	6	10	21	6	29	16	21	26	21	21	16	17	24	28	20	27	13	15	MHA		1	ND	ND	ND	ND	ND	ND	(-)	(-)
ANC 7638	A. vivianii §	A. vivianii/A. modestus	98.0/97.7		A. courvalinii	2.24	B	A. vivianii (2.21)	F14_floor	F14	30	6	10	22	6	29	16	22	25	18	20	17	17	25	28	22	30	13	15	MHA		1	ND	ND	ND	ND	ND	ND	(-)	(-)
ANC 7639	A. vivianii §	A. vivianii/A. modestus	98.3/98.0		A. vivianii	2.43	B	A. courvalinii (2.26)	F14_floor	F14	30	6	12	22	6	29	16	22	25	21	19	14	13	23	26	19	25	12	14	MHA		2	ND	ND	ND	ND	ND	ND	(-)	(-)
ANC 7888	A. vivianii §	A. vivianii/A. modestus	98.9/98.0		A. vivianii	2.29	B	A. courvalinii (2.25)	F16_floor	F16	30	6	12	23	10	30	18	21	25	20	21	16	15	23	27	20	28	9	15	MHA		1	ND	ND	ND	ND	ND	ND	(-)	(-)
ANC 7439	A. wanghuae [IL1]	A. wanghuae	98		A. wanghuae	2.3	A		F11_floor	F11	30	15	17	23	6-14	26	25	18	29	25	24	21	21	23	27	26	26	11	29	MHA		0.25	ND	ND	ND	ND	ND	ND	(-)	(-)
ANC 7412	Taxon 7209 [IL1]	Taxon 7209/A.towneri	100/90.7		Taxon 7209	2.52	A		F23_floor	F23	30	20	17	16	15	23	22	19	22	19	20	17	6	23	24	25	22	6	24	MHA		0.25	ND	strA	strB	(-)	ND	ND	(-)	(-)
ANC 7413	Taxon 7209 [IL1]	Taxon 7209/A.towneri	100/90.7		Taxon 7209	2.34	A		F23_floor	F23	30	17	19	20	18	23	22	17	25	19	17	13	7	17	24	17	20	18	22	Levinthal		0.25	ND	strA	strB	(-)	ND	ND	(-)	(-)
ANC 7414	Taxon 7209 [IL1]	Taxon 7209/A.towneri	100/90.7		Taxon 7209	2.38	A		F23_floor	F23	30	17	19	18	17	24	23	17	24	18	16	15	15	18	23	19	6	13	21	Levinthal		<0.25	ND	ND	ND	ND	(-)	(-)	(-)	(-)
ANC 7551	Taxon 7209 [IL1]	Taxon 7209/A.towneri	100/90.7		Taxon 7209	2.39	A		F03_floor	F03	30	19	21	18	17	24	22	18	26	20	19	13	6	18	23	19	18	17	24	Levinthal		<0.25	ND	strA	strB	(-)	ND	ND	(-)	(-)
ANC 7562	Taxon 7209 [IL1]	Taxon 7209/A.towneri	100/90.7		Taxon 7209	2.3	A		F28_floor	F28	30	12	18	17	16	21	24	19	28	22	22	18	6	20	24	10	6	14	31	MHA		<0.25	tet(Y)	strA	strB	(-)	(-)	sul2	(-)	(-)
ANC 7563	Taxon 7209 [IL1]	Taxon 7209/A.towneri	100/90.7		Taxon 7209	2.49	A		F28_floor	F28	30	19	22	20	20	25	25	20	27	20	20	15	6	21	28	20	18	14	25	Levinthal		<0.25	ND	(-)	(-)	(-)	ND	ND	(-)	(-)
ANC 7720	Taxon 7209 [IL1]	Taxon 7209/A.towneri	100/90.7		Taxon 7209	2.34	A		F27_floor	F27	30	18	20	16	16	23	24	17	26	16	15	13	6	16	21	24	6	13	24	MHA		<0.25	ND	strA	strB	(-)	(-)	sul2	(-)	(-)
ANC 7727	Taxon 7209 [IL1]	Taxon 7209/A.towneri	100/90.7		Taxon 7209	2.55	A		F01_floor	F01	30	16	21	20	17	23	21	21	19	17	15	15	6	32	24	24	30	11	30	MHA		<0.25	ND	(-)	(-)	aadA27	ND	ND	(-)	(-)
ANC 7676	Taxon 7209 [IL2]	Taxon 7209/A.towneri	100/90.7		Taxon 7209	2.17	A		F13_floor	F13	30	18	20	19	17	23	21	17	23	18	17	14	16	18	23	19	6-14	14	22	Levinthal		<0.25	ND	ND	ND	ND	(-)	(-)	(-)	(-)
ANC 7726	Taxon 7209 [IL2]	Taxon 7209/A.towneri	100/90.7		Taxon 7209	2.28	A		F01_floor	F01	30	18	21	17	17	22	24	18	22	17	16	13	6	16	24	20	6	12	24	Levinthal		<0.25	ND	strA	strB	(-)	(-)	sul2	(-)	(-)
ANC 7384	Taxon 7384 [IL1]	Taxon 7384	Reference		Taxon 7384	Reference			F25_floor	F25	30	10	16	14	17	22	25	12	26	24	24	19	18	16	15	17	21	12	28	MHA		<0.25	ND	ND	ND	ND	ND	ND	(-)	(-)
ANC 7448	Taxon 7384 [IL1]	Taxon 7384/Taxon 7683	100/98.0		Taxon 7384	2.47	A		F21_floor	F21	30	12	17	22	12	27	23	20	27	22	23	17	20	24	25	23	25	11	22	MHA		<0.25	ND	ND	ND	ND	ND	ND	(-)	(-)
ANC 7584	Taxon 7384 [IL1]	Taxon 7384/Taxon 7683	100/98.0		Taxon 7384	2.53	A		F26_floor	F26	30	15	21	19	16	22	22	16	23	22	19	16	16	17	21	20	20	6	22	MHA		<0.25	ND	ND	ND	ND	ND	ND	(-)	(-)
ANC 7631	Taxon 7384 [IL1]	Taxon 7384/Taxon 7683	100/98.0		Taxon 7384	2.32	A		F14_floor	F14	30	13	19	16	13	18	19	14	21	19	18	16	15	17	24	22	20	14	23	MHA		<0.25	ND	ND	ND	ND	ND	ND	(-)	(-)
ANC 7633	Taxon 7384 [IL1]	Taxon 7384/Taxon 7683	99.7/97.7		Taxon 7384	2.34	A		F14_floor	F14	30	12	16	14	16	18	24	12	22	20	18	16	16	18	21	19	18	10	23	MHA		<0.25	ND	ND	ND	ND	ND	ND	(-)	(-)
ANC 7587	Taxon 7384 [IL2]	Taxon 7384/Taxon 7683	99.7/97.7		Taxon 7384	2.3	B	Taxon 7587 (2.07)	F22_floor	F22	30	19	22	22	19	>30	>30	21	29	23	22	17	18	19	25	24	27	6	28	MHA		<0.25	ND	ND	ND	ND	ND	ND	(-)	(-)
ANC 7632	Taxon 7384 [IL2]	Taxon 7384/Taxon 7683	100/98.0		Taxon 7384	2.27	A		F14_floor	F14	30	16	21	20	18	25	24	17	22	22	22	18	19	20	25	22	23	11	25	MHA		<0.25	ND	ND	ND	ND	ND	ND	(-)	(-)
ANC 7441	Taxon 7443 [IL1]	Taxon 7443	100		Taxon 7443	2.49	A		F11_floor	F11	30	15	16	18	15	20	20	18	25	20	19	15	16	17	24	17	20	6	23	Levinthal		<0.25	ND	ND	ND	ND	ND	ND	(-)	(-)
ANC 7442	Taxon 7443 [IL1]	Taxon 7443	98.3		Taxon 7443	2.5	A		F11_floor	F11	30	16	17	18	14	20	21	16	25	20	18	15	17	17	22	18	19	7	22	Levinthal		<0.25	ND	ND	ND	ND	ND	ND	(-)	(-)
ANC 7443	Taxon 7443 [IL1]	Taxon 7443	Reference		Taxon 7443	Reference			F11_floor	F11	30	17	17	24	15	28	20	20	27	23	22	17	20	20	26	21	24	6	27	MHA		<0.25	ND	ND	ND	ND	ND	ND	(-)	(-)
ANC 7598	Taxon 7443 [IL1]	Taxon 7443	100		Taxon 7443	2.49	A		F22_floor	F22	30	15	18	19	14	14-25	16	18	21	18	17	14	15	16	20	17	17	14	18	Levinthal		<0.25	ND	ND	ND	ND	ND	ND	(-)	(-)
ANC 7628	Taxon 7443 [IL1]	Taxon 7443	99.2		Taxon 7443	2.44	A		F14_floor	F14	30	16	19	17	14	20	23	16	28	20	20	15	17	17	23	18	15	8	24	Levinthal		<0.25	ND	ND	ND	ND	ND	ND	(-)	(-)
ANC 7394	Taxon 7458 [IL1]	Taxon 7458	100		Taxon 7458	2.36	A		F09_floor	F09	30	10	22	15	15	21	23	12	>30	19	17	19	19	21	25	25	6	6	>30	MHA		<0.25	ND	ND	ND	ND	(-)	(-)	(-)	(-)
ANC 7457	Taxon 7458 [IL1]	Taxon 7458	98.3		Taxon 7458	2.39	A		F21_floor	F21	30	13	14	17	12	25	22	14	20	22	20	18	18	16	24	23	6	14	30	MHA		<0.25	ND	ND	ND	ND	(-)	(-)	(-)	(-)
ANC 7458	Taxon 7458 [IL1]	Taxon 7458	Reference		Taxon 7458	Reference			F21_floor	F21	30	16	22	21	6	22	21	15	26	24	23	20	21	20	30	26	ND	ND	31	MHA		0.25	ND	ND	ND	ND	ND	ND	(-)	(-)
ANC 7506	Taxon 7506 [IL1]	Taxon 7506	Reference		Taxon 7506	Reference			F26_floor	F26	30	13	18	18	17	25	23	18	28	19	17	13	14	17	25	20	23	10	25	MHA		0.25	ND	ND	ND	ND	ND	ND	(-)	(-)
ANC 7518	Taxon 7506 [IL1]	Taxon 7506	100		Taxon 7506	2.6	A		F18_floor	F18	30	15	18	20	14	26	24	18	29	19	17	14	15	19	27	20	27	12	25	MHA		<0.25	ND	ND	ND	ND	ND	ND	(-)	(-)
ANC 7519	Taxon 7506 [IL1]	Taxon 7506	100		Taxon 7506	2.62	A		F18_floor	F18	30	13	19	20	17	23	23	18	29	18	18	13	14	16	26	19	21	6	26	MHA		0.25	ND	ND	ND	ND	ND	ND	(-)	(-)
ANC 7577	Taxon 7506 [IL1]	Taxon 7506	99.2		Taxon 7506	2.53	A		F18_floor	F18	30	16	21	22	12	25	25	19	27	19	17	13	14	15	26	20	24	6	26	MHA		0.25	ND	ND	ND	ND	ND	ND	(-)	(-)
ANC 7578	Taxon 7506 [IL1]	Taxon 7506	98.9		Taxon 7506	2.58	A		F26_floor	F26	30	15	20	21	18	24	24	19	31	20	18	14	15	19	27	20	27	12	27	MHA		<0.25	ND	ND	ND	ND	ND	ND	(-)	(-)
ANC 7582	Taxon 7506 [IL1]	Taxon 7506	100		Taxon 7506	2.6	A		F26_floor	F26	30	15	21	22	16	26	23	18	28	20	19	13	14	19	28	19	28	6	26	MHA		<0.25	ND	ND	ND	ND	ND	ND	(-)	(-)
ANC 7589	Taxon 7506 [IL1]	Taxon 7506	100		Taxon 7506	2.6	A		F02_floor	F02	30	12	19	18	17	24	24	16	30	19	18	14	14	21	27	20	22	9	26	MHA		<0.25	ND	ND	ND	ND	ND	ND	(-)	(-)
ANC 7594	Taxon 7506 [IL1]	Taxon 7506	100		Taxon 7506	2.65	A		F22_floor	F22	30	14	19	21	16	24	22	18	29	18	17	13	14	15	25	19	20	7	25	MHA		<0.25	ND	ND	ND	ND	ND	ND	(-)	(-)
ANC 7595	Taxon 7506 [IL1]	Taxon 7506	100		Taxon 7506	2.56	A		F02_floor	F02	30	14	19	20	20	23	24	17	27	18	17	13	15	15	25	19	26	6	24	MHA		<0.25	ND	ND	ND	ND	ND	ND	(-)	(-)
ANC 7596	Taxon 7506 [IL1]	Taxon 7506	100		Taxon 7506	2.46	A		F02_floor	F02	30	15	19	20	14	24	23	18	26	17	16	13	14	16	25	19	26	11	25	MHA		<0.25	ND	ND	ND	ND	ND	ND	(-)	(-)
ANC 7597	Taxon 7506 [IL1]	Taxon 7506	100		Taxon 7506	2.7	A		F22_floor	F22	30	12	20	16	14	23	24	17	27	21	21	16	15	19	22	22	23	6	26	MHA		<0.25	ND	ND	ND	ND	ND	ND	(-)	(-)
ANC 7624	Taxon 7506 [IL1]	Taxon 7506	100		Taxon 7506	2.62	A		F14_floor	F14	30	15	21	22	21	22	26	19	25	18	16	12	14	17	28	22	27	6	28	MHA		<0.25	ND	ND	ND	ND	ND	ND	(-)	(-)
ANC 7440	Taxon 7509 [IL1]	Taxon 7509	100		Taxon 7509	2.58	A		F11_floor	F11	30	17	22	20	16	25	24	17	26	19	18	14	14	16	22	18	20	10	26	Levinthal		0.25	ND	ND	ND	ND	ND	ND	(-)	(-)
ANC 7509	Taxon 7509 [IL1]	Taxon 7509	Reference		Taxon 7509	Reference			F26_floor	F26	30	18	24	25	18	24	21	21	26	21	21	16	17	15	22	21	21	22	24	Levinthal		0.25	ND	ND	ND	ND	ND	ND	(-)	(-)
ANC 7510	Taxon 7509 [IL1]	Taxon 7509	99.4		Taxon 7509	2.4	A		F26_floor	F26	30	16	18	17	15	24	24	19	26	19	18	12	16	16	22	18	15	13	19	Levinthal		0.25	ND	ND	ND	ND	ND	ND	(-)	(-)
ANC 7514	Taxon 7509 [IL1]	Taxon 7509	99.4		Taxon 7509	2.36	A		F18_floor	F18	30	15	17	17	15	20	22	17	25	18	18	14	16	16	21	18	17	12	18	Levinthal		0.25	ND	ND	ND	ND	ND	ND	(-)	(-)
ANC 7602	Taxon 7509 [IL1]	Taxon 7509	99.2		Taxon 7509	2.4	A		F22_floor	F22	30	15	17	18	14	21	19	17	23	19	17	14	16	16	23	21	17	11	24	Levinthal		<0.25	ND	ND	ND	ND	ND	ND	(-)	(-)
ANC 7650	Taxon 7509 [IL1]	Taxon 7509	99.4		Taxon 7509	2.61	A		F10_floor	F10	30	16	19	20	19	24	23	17	23	20	18	13	14	16	23	18	18	15	25	Levinthal		<0.25	ND	ND	ND	ND	ND	ND	(-)	(-)
ANC 7515	Taxon 7509 [IL2]	Taxon 7509	99.2		Taxon 7509	2.17	A		F18_floor	F18	30	17	18	21	17	25	23	21	27	19	17	14	15	15	23	19	19	10	22	Levinthal		0.25	ND	ND	ND	ND	ND	ND	(-)	(-)
ANC 7603	Taxon 7509 [IL2]	Taxon 7509	99.2		Taxon 7509	2.25	A		F02_floor	F02	30	16	18	17	13	19	21	15	22	18	17	15	16	16	22	17	16	6	22	Levinthal		0.25	ND	ND	ND	ND	ND	ND	(-)	(-)
ANC 7604	Taxon 7509 [IL2]	Taxon 7509	99.4		Taxon 7509	2.18	A		F02_floor	F02	30	16	19	20	17	24	21	18	24	17	18	15	15	15	23	18	19	13	23	Levinthal		0.25	ND	ND	ND	ND	ND	ND	(-)	(-)
ANC 7437	Taxon 7517 [IL1]	Taxon 7517	99.4		Taxon 7517	2.6	A		F11_floor	F11	30	6	6	20	12	29	22	17	26	24	24	18	20	21	31	21	25	6	18	MHA		0.5	ND	ND	ND	ND	ND	ND	(-)	(-)
ANC 7516	Taxon 7517 [IL1]	Taxon 7517	99.4		Taxon 7517	2.58	B	A. sp. (2.19)	F18_floor	F18	30	6	6	21	6	29	21	19	29	27	27	21	22	30	30	26	30	16	26	MHA		0.5	ND	ND	ND	ND	ND	ND	(-)	(-)
ANC 7517	Taxon 7517 [IL1]	Taxon 7517	Reference		Taxon 7517	Reference			F18_floor	F18	30	10	15	17	14	26	26	20	27	23	21	17	20	21	30	21	24	10	18	MHA		0.5	ND	ND	ND	ND	ND	ND	(-)	(-)
ANC 7576	Taxon 7576 [IL1]	Taxon 7576	Reference		Taxon 7576	Reference			F26_floor	F26	30	19	23	21	21	26	27	30	32	20	20	15	16	19	32	26	21	6	31	Levinthal		<0.25	ND	ND	ND	ND	ND	ND	(-)	(-)
ANC 7583	Taxon 7576 [IL1]	Taxon 7576	100		Taxon 7576	2.51	A		F18_floor	F18	30	19	22	26	25	27	26	29	31	26	23	17	22	16	29	23	16	13	33	Levinthal		<0.25	ND	ND	ND	ND	ND	ND	(-)	(-)
ANC 7579	Taxon 7579 [IL1]	Taxon 7579	Reference		Taxon 7579	Reference			F18_floor	F18	30	20	26	23	19	21	20	22	22	17	18	14	14	17	22	20	18	16	21	Levinthal		<0.25	ND	ND	ND	ND	ND	ND	(-)	(-)
ANC 7580	Taxon 7579 [IL1]	Taxon 7579	100		Taxon 7579	2.36	A		F18_floor	F18	30	19	24	22	25	27	25	25	31	19	18	14	13	15	21	19	15	16	22	Levinthal		<0.25	ND	ND	ND	ND	ND	ND	(-)	(-)
ANC 7926	Taxon 7579 [IL1]	Taxon 7579	100		Taxon 7579	2.3	A		F10_floor	F10	44	18	20	21	16	22	24	18	24	22	22	18	17	21	25	23	6	16	24	MHA		<0.25	ND	ND	ND	ND	(-)	(-)	(-)	(-)
ANC 7927	Taxon 7579 [IL2]	Taxon 7579	100		Taxon 7579	2.26	A		F10_floor	F10	44	20	24	21	25	30	30	26	28	19	16	12	12	20	24	20	12	17	21	Levinthal		<0.25	ND	(-)	(-)	(-)	ND	ND	(-)	(-)
ANC 7554	Taxon 7593 [IL1]	Taxon 7593	100		Taxon 7593	2.45	A		F03_floor	F03	30	21	24	23	17	28	25	16	25	22	21	18	18	21	24	22	22	15	26	MHA		<0.25	ND	ND	ND	ND	ND	ND	(-)	(-)
ANC 7592	Taxon 7593 [IL1]	Taxon 7593	100		Taxon 7593	2.53	A		F02_floor	F02	30	20	25	25	17	29	29	20	28	21	19	16	17	21	25	22	27	14	27	MHA		<0.25	ND	ND	ND	ND	ND	ND	(-)	(-)
ANC 7593	Taxon 7593 [IL1]	Taxon 7593	Reference		Taxon 7593	Reference			F02_floor	F02	30	22	26	26	17	30	28	22	32	21	19	16	17	24	27	25	27	13	29	MHA		0.25	ND	ND	ND	ND	ND	ND	(-)	(-)
ANC 7658	Taxon 7593 [IL1]	Taxon 7593	100		Taxon 7593	2.52	A		F10_floor	F10	30	22	26	27	20	>30	30	24	>30	25	24	18	18	26	30	27	>30	16	>30	MHA		<0.25	ND	ND	ND	ND	ND	ND	(-)	(-)
ANC 7660	Taxon 7593 [IL1]	Taxon 7593	99.2		Taxon 7593	2.55	A		F10_floor	F10	30	23	29	29	20	>30	>30	27	>30	24	24	20	20	25	34	28	>30	6	>30	MHA		<0.25	ND	ND	ND	ND	ND	ND	(-)	(-)
ANC 7503	Taxon 7655 [IL1]	Taxon 7655	99.7		Taxon 7655	2.38	A		F26_floor	F26	30	17	24	28	7	32	30	21	32	27	25	19	22	23	32	26	32	17	33	MHA		0.25	ND	ND	ND	ND	ND	ND	(-)	(-)
ANC 7504	Taxon 7655 [IL1]	Taxon 7655	99.4		Taxon 7655	2.56	A		F26_floor	F26	30	15	19	29	10	30	28	20	33	26	25	18	22	21	30	26	28	10	30	MHA		0.5	ND	ND	ND	ND	ND	ND	(-)	(-)
ANC 7511	Taxon 7655 [IL1]	Taxon 7655	100		Taxon 7655	2.67	A		F18_floor	F18	30	14	21	27	11	30	29	21	33	29	26	19	24	23	32	26	33	17	31	MHA		0.5	ND	ND	ND	ND	ND	ND	(-)	(-)
ANC 7512	Taxon 7655 [IL1]	Taxon 7655	99.7		Taxon 7655	2.58	A		F18_floor	F18	30	15	21	29	11	33	29	24	35	27	24	19	23	21	30	25	29	14	30	MHA		0.25	ND	ND	ND	ND	ND	ND	(-)	(-)
ANC 7513	Taxon 7655 [IL1]	Taxon 7655	100		Taxon 7655	2.54	A		F18_floor	F18	30	12	16	28	11	33	28	23	33	27	25	18	22	21	31	26	33	15	30	MHA		0.25	ND	ND	ND	ND	ND	ND	(-)	(-)
ANC 7553	Taxon 7655 [IL1]	Taxon 7655	98.9		Taxon 7655	2.67	A		F03_floor	F03	30	15	18	21	12	24	23	17	27	25	23	19	19	22	23	23	26	12	26	MHA		0.25	ND	ND	ND	ND	ND	ND	(-)	(-)
ANC 7588	Taxon 7655 [IL1]	Taxon 7655	99.7		Taxon 7655	2.69	A		F02_floor	F02	30	15	16	21	12	25	25	21	>30	30	29	23	27	21	28	23	25	12	27	MHA		0.25	ND	ND	ND	ND	ND	ND	(-)	(-)
ANC 7634	Taxon 7655 [IL1]	Taxon 7655	100		Taxon 7655	2.68	A		F14_floor	F14	30	12	19	28	10	33	29	19	33	27	24	18	23	22	31	25	29	10	30	MHA		0.25	ND	ND	ND	ND	ND	ND	(-)	(-)
ANC 7635	Taxon 7655 [IL1]	Taxon 7655	100		Taxon 7655	2.64	A		F14_floor	F14	30	20	26	30	12	34	33	24	34	28	27	20	24	21	31	26	33	14	31	MHA		0.25	ND	ND	ND	ND	ND	ND	(-)	(-)
ANC 7654	Taxon 7655 [IL1]	Taxon 7655	98.6		Taxon 7655	2.7	A		F10_floor	F10	30	15	22	28	11	32	28	22	32	27	26	19	22	22	29	24	32	15	30	MHA		<0.25	ND	ND	ND	ND	ND	ND	(-)	(-)
ANC 7655	Taxon 7655 [IL1]	Taxon 7655	Reference		Taxon 7655	Reference			F10_floor	F10	30	22	28	29	13	32	33	22	33	27	24	19	23	21	29	25	32	6	30	MHA		<0.25	ND	ND	ND	ND	ND	ND	(-)	(-)
ANC 7682	Taxon 7655 [IL2]	Taxon 7655	99.7		Taxon 7655	2.46	B	A. sp. (2.19)	F17_floor	F17	30	23	28	28	12	31	31	23	32	25	22	18	20	23	26	26	30	13	31	MHA		<0.25	ND	ND	ND	ND	ND	ND	(-)	(-)
ANC 7683	Taxon 7683 [IL1]	Taxon 7683	Reference		Taxon 7683	Reference			F17_floor	F17	30	24	27	25	20	32	32	27	31	26	24	18	23	20	31	27	33	11	29	MHA		<0.25	ND	ND	ND	ND	ND	ND	(-)	(-)
ANC 7752	Taxon 7683 [IL1]	Taxon 7683/Taxon 7384	100/97.7		Taxon 7683	2.55	A		F08_floor	F08	30	20	22	23	19	27	25	22	27	24	21	15	18	20	29	24	27	6	25	MHA		0.5	ND	ND	ND	ND	ND	ND	(-)	(-)
ANC 7947	Taxon 7947 [IL1]	Taxon 7947	Reference		Taxon 7947	Reference			F21_floor	F21	44	25	24	25	22	29	27	24	25	16	19	14	20	22	27	25	17	6	32	Levinthal		<0.25	ND	ND	ND	ND	ND	ND	(-)	(-)
ANC 7948	Taxon 7947 [IL1]	Taxon 7947	100		Taxon 7947	2.69	A		F21_floor	F21	44	21	26	24	23	27	27	25	25	19	19	14	6	19	24	23	21	18	29	Levinthal		<0.25	ND	(-)	(-)	(-)	ND	ND	(-)	(-)
ANC 7949	Taxon 7947 [IL1]	Taxon 7947	100		Taxon 7947	2.7	A		F21_floor	F21	44	20	22	23	21	28	24	22	23	18	19	14	15	18	25	24	21	22	30	Levinthal		<0.25	ND	ND	ND	ND	ND	ND	(-)	(-)
ANC 7950	Taxon 7947 [IL1]	Taxon 7947	100		Taxon 7947	2.71	A		F21_floor	F21	44	16	18	19	18	24	19	23	25	16	17	14	13	15	21	22	21	17	27	Levinthal		<0.25	ND	ND	ND	ND	ND	ND	(-)	(-)
ANC 7968	Taxon 7947 [IL1]	Taxon 7947	100		Taxon 7947	2.73	A		F23_floor	F23	44	19	23	21	20	24	24	23	25	19	19	14	6	19	26	6	6	16	30	Levinthal		<0.25	tet(Y)	strA	strB	(-)	(-)	sul2	(-)	(-)
ANC 7971	Taxon 7947 [IL1]	Taxon 7947	100		Taxon 7947	2.66	A		F09_floor	F09	44	18	22	19	20	23	21	17	25	16	19	14	14	16	25	21	15	17	27	Levinthal		<0.25	ND	ND	ND	ND	ND	ND	(-)	(-)
ANC 7973	Taxon 7947 [IL1]	Taxon 7947	100		Taxon 7947	2.62	A		F09_floor	F09	44	19	20	19	19	21	20	19	21	18	19	13	14	17	25	21	19	17	27	Levinthal		<0.25	ND	ND	ND	ND	ND	ND	(-)	(-)
ANC 7385	A. lwoffii phylogroup	A. lwoffii/A. pecorum	98.9/96.3		A. pseudolwoffii	2.3	B	Taxon 7443 (2.23)	F25_floor	F25	30	15	21	18	16	21	23	18	23	19	24	21	9	19	25	20	23	18	25	Levinthal		0.25	ND	strA	strB	(-)	ND	ND	(-)	(-)
ANC 7438	A. lwoffii phylogroup	A. lwoffii/A. pecorum	98.3/97.5		A. pseudolwoffii	2.46	A		F11_floor	F11	30	17	20	23	16	22	24	17	23	22	20	18	16	20	20	20	20	14	24	Levinthal		<0.25	ND	ND	ND	ND	ND	ND	(-)	(-)
ANC 7451	A. lwoffii phylogroup	A. lwoffii/A. pecorum	98.9/96.6		A. pseudolwoffii	2.26	B	Taxon 7443 (2.19)	F21_floor	F21	30	17	17	14	14	20	21	15	20	16	18	16	8	17	21	18	21	12	22	Levinthal		0.25	ND	strA	strB	(-)	ND	ND	(-)	(-)
ANC 7556	A. lwoffii phylogroup	A. lwoffii/A. pecorum	98.6/95.8		A. pseudolwoffii	2.48	A		F03_floor	F03	30	16	20	18	15	26	26	18	28	19	18	14	16	20	22	20	16	14	25	Levinthal		0.25	ND	ND	ND	ND	ND	ND	(-)	(-)
ANC 7565	A. lwoffii phylogroup	A. pseudolwoffii/A. lwoffii	96.6/96.1		A. pseudolwoffii	2.25	B	Taxon 7443 (2.04)	F28_floor	F28	30	19	20	18	15	24	24	18	23	17	18	14	13	20	20	21	18	13	21	Levinthal		0.25	ND	ND	ND	ND	ND	ND	(-)	(-)
ANC 7601	A. lwoffii phylogroup	A. lwoffii/A. pecorum	98.6/97.5		A. lwoffii	1.73	B		F22_floor	F22	30	20	22	20	13	24	24	19	25	22	26	20	22	23	29	26	28	6	29	MHA		<0.25	ND	ND	ND	ND	ND	ND	(-)	(-)
ANC 7625	A. lwoffii phylogroup	A. lwoffii/A. pecorum	99.2/96.1		A. lwoffii	2.09	A		F14_floor	F14	30	16	21	21	15	26	21	19	24	20	19	14	15	20	22	20	26	15	23	MHA		<0.25	ND	ND	ND	ND	ND	ND	(-)	(-)
ANC 7662	A. lwoffii phylogroup	A. pseudolwoffii/A. lwoffii	96.6/96.6		A. pseudolwoffii	2.38	A		F06_floor	F06	30	16	21	18	17	21	21	15	23	18	16	14	9	16	20	16	6	11	21	Levinthal		<0.25	ND	strA	strB	(-)	(-)	sul2	(-)	(-)
ANC 7730	A. lwoffii phylogroup	A. lwoffii/A. pecorum	99.2/96.6		A. pseudolwoffii	2.29	B	Taxon 7443 (2.25)	F01_floor	F01	30	6	13	19	6	19	16	18	26	16	18	15	8	18	25	20	17	12	21	Levinthal		<0.25	ND	strA	strB	(-)	ND	ND	(-)	(-)
ANC 7876	A. lwoffii phylogroup	A. lwoffii/A. pecorum	99.4/96.6		A. lwoffii	1.81	B		F04_floor	F04	30	20	22	23	15	26	22	20	26	21	21	16	17	21	27	25	29	10	28	MHA		<0.25	ND	ND	ND	ND	ND	ND	(-)	(-)
ANC 7878	A. lwoffii phylogroup	A. lwoffii/A. pecorum	98.3/97.4		Taxon 6053	2.61	A		F04_floor	F04	30	16	20	20	14	27	22	19	26	21	20	15	17	19	25	19	17	6	25	Levinthal		<0.25	ND	ND	ND	ND	ND	ND	(-)	V216rep
ANC 7657	A. schindleri-like	A. schindleri-like	95.2		A. schindleri	2.03	A		F10_floor	F10	30	21	25	24	14	30	27	21	30	25	23	17	20	22	30	27	32	9	31	MHA		<0.25	ND	ND	ND	ND	ND	ND	(-)	(-)
ANC 7673	A. schindleri-like	A. schindleri-like	96.3		A. schindleri	2.2	A		F13_floor	F13	30	15	18	25	13	29	21	24	31	26	23	16	19	23	28	25	33	15	31	MHA		<0.25	ND	ND	ND	ND	ND	ND	(-)	(-)
ANC 7382	A. sp. ¶	A. sp. (ANC 7382 = ANC 7383)	Reference		ANC 7382	Reference			F25_floor	F25	30	19	22	24	22	31	30	25	32	22	21	14	6	21	26	24	30	6	31	MHA		<0.25	ND	strA	strB	(-)	ND	ND	(-)	(-)
ANC 7383	A. sp. ¶	A. sp. (ANC 7382 = ANC 7383)	100		ANC 7382	2.33	A		F25_floor	F25	30	22	27	25	20	32	32	27	31	26	22	18	23	23	31	27	33	15	29	MHA		<0.25	ND	ND	ND	ND	ND	ND	(-)	(-)
ANC 7508	A. sp. singleton	Unique	≤ 94.1		ANC 7564	2.02	A		F26_floor	F26	30	14	17	17	13	17	20	11	20	16	15	14	14	18	19	21	20	6	22	MHA		<0.25	ND	ND	ND	ND	ND	ND	(-)	(-)
ANC 7552	A. sp. singleton	Unique	≤ 86.1		A. sp.	1.57	C		F03_floor	F03	30	11	17	21	12	24	24	16	26	22	21	16	19	20	22	20	6	15	23	MHA		0.25	ND	ND	ND	ND	(-)	(-)	(-)	(-)
ANC 7564	A. sp. singleton	Unique	≤ 95.2		Taxon 7384	1.8	B		F28_floor	F28	30	19	23	24	19	22	25	26	27	18	18	16	17	17	20	20	16	15	25	Levinthal		<0.25	ND	ND	ND	ND	ND	ND	(-)	(-)
ANC 7581	A. sp. singleton	Unique	≤ 91.0		A. sp.	1.65	C		F18_floor	F18	30	19	21	22	12	25	24	19	28	25	24	20	24	24	29	23	21	14	30	MHA		0.25	ND	ND	ND	ND	ND	ND	(-)	(-)
ANC 7944	A. sp. singleton	Unique	≤ 84.2		A. sp.	1.49	C		F03_floor	F03	44	19	23	22	16	25	28	20	26	22	23	16	16	15	20	19	16	19	26	Levinthal		<0.25	ND	ND	ND	ND	ND	ND	(-)	(-)
ANC 7874	A. terrae phylogroup	A. terrae/Taxon 24C/Taxon 24D	98.0/96.3/96.3		A. terrestris	2.14	A		F04_floor	F04	30	16	19	18	8	22	19	15	23	22	19	15	18	18	19	19	23	10	22	MHA		<0.25	ND	ND	ND	ND	ND	ND	(-)	(-)
ANC 7456	Inconclusive	Unique	≤ 91.1		Taxon 7579	2.49	A		F21_floor	F21	30	21	18	24	20	25	23	20	28	20	18	12	13	17	22	21	18	19	23	Levinthal		<0.25	ND	ND	ND	ND	ND	ND	(-)	(-)
ANC 7591	Inconclusive	Taxon 7593	99.2		A. johnsonii	1.82	B		F22_floor	F22	30	20	24	22	18	27	28	25	31	22	19	14	15	22	28	24	27	18	30	MHA		<0.25	ND	ND	ND	ND	ND	ND	(-)	(-)
ANC 7873	Inconclusive	A. lwoffii/A. pecorum	98.3/97.5		A. terrestris	2.2	A		F04_floor	F04	30	14	17	19	7	26	21	16	25	25	25	19	11	19	20	27	24	7	27	MHA		<0.25	ND	(-)	(-)	aadA27	ND	ND	(-)	(-)
* Abbreviations: AMC, amoxycillin+clavulanate; AMP, ampicillin; C, chloramphenicol; CAZ, ceftazidime; CIP, ciprofloxacin; CN, gentamicin; COL, colistin; K, kanamycin; KF, cefalotin; MEM, meropenem; MHA, Mueller-Hinton agar; MIC, minimum inhibitory concentration; N, neomycin; NA, nalidixin; ND, not determined; P, penicillin G; PRL, piperacillin; RL, sulfamethoxazole; S, streptomycin; SAM, ampicill…
† See the main text for explanation.
‡ Identified as A. indicus despite an rpoB sequence similarity below 97%.
§ All A. vivianii strains acidified D-glucose and lacked gelatinase activity, distinguishing them from the closely related species.
¶ Conspecific strains based on both rpoB sequence analysis and MALDI-TOF MS, but recovered from a single sample.
#Positive PCR products verified by sequencing are indicated by the corresponding gene name; (-) = negative; ND = not done. In A. feacalis and A. thermotolerans, the presence of ARGs was confirmed by whole-genome sequencing.

## Sheet: Table S6
Table S6	Primers and PCR conditions for screening of antibiotic resistance genes in Acinetobacter isolates.
Gene	Primers	Primer sequence	Final primer concentration (nM)	Product size (bp)	Cycling conditions	Positive control	Reference for primers
strA	strA-F	TGGCAGGAGGAACAGGAGG	400	405	98 °C 2 min, 35 x (98 °C 30 s, 57 °C 15 s, 72 °C 20 s), 72 °C 5 min	E. coli cv601 pHHV216*	[1]
	strA-R	AGGTCGATCAGACCCGTGC	400
strB	strB-F	GCGGACACCTTTTCCAGCCT	400	620	98 °C 2 min, 35 x (98 °C 30 s, 57 °C 15 s, 72 °C 20 s), 72 °C 5 min	E. coli cv601 pHHV216*	[1]
	strB-R	TCCGCCATCTGTGCAATGCG	400
strA-strB	strAB-1	TTGAATCGAACTAATAT	500	1640	98 °C 2 min, 35 x (98 °C 30 s, 48 °C 30 s, 72 °C 1 min), 72 °C 5 min	E. coli cv601 pHHV216*	[2]
	strAB-2	CTAGTATGACGTCTGTCG	500
sul1	Sul1-Kerrn-F	CGGCGTGGGCTACCTGAACG	200	433	98 °C 2 min, 35 x (98 °C 30 s, 69 °C 20 s, 72 °C 20 s), 72 °C 5 min	E. coli J53 pR388*	[3]
	Sul1-Kerrn-R	GCCGATCGCGTGAAGTTCCG	200
sul2	Sul2-Kerrn-F	GCGCTCAAGGCAGATGGCATT	800	293	98 °C 2 min, 35 x (98 °C 30 s, 66 °C 20 s, 72 °C 20 s), 72 °C 5 min	E. coli cv601 pHHV216*	[3]
	Sul2-Kerrn-R	GCGTTTGATACCGGCACCCGT	800
tet(Y)	TetY-FW	ATTTGTACCGGCAGAGCAAAC	800	181	98 °C 2 min, 35 x (98 °C 30 s, 62 °C 20 s, 72 °C 20 s), 72 °C 5 min	E. coli HB101 pIE1122*	[4]
	TetY-RV	GGCGCTGCCGCCATTATGC	800
blaOXA-58	OXA-58F	ATGGCACGCATTTAGACCGA	100	446	98 °C 2 min, 35 x (98 °C 30 s, 52 °C 30 s, 72 °C 30 s), 72 °C 5 min	A. baumannnii ANC 4131	This study
	OXA-58R	ACGATTCTCCCCTCTGCGC	100
V216-rep (LowGC plasmids)	V216repF	AATTGACCGATTTAGTTGTGACC	300	912	98 °C 2 min, 35 x (98 °C 30 s, 56 °C 30 s, 72 °C 30 s), 72 °C 5 min	E. coli cv601 pHHV216*	[5]
(LowGC plasmids)	V216repR	TGCTGATTTGYTTTGGAGATAC	300
*Strains serving as positive controls were kindly provided by Kornelia Smalla (Julius-Kuhn Institute, Braunschweig) and Heike Schmitt (Institute for Risk Assessment Sciences, Utrecht).
	References
[1]	Chuanchuen, R., & Padungtod, P. (2009). Antimicrobial resistance genes in Salmonella enterica isolates from poultry and swine in Thailand. Journal of Veterinary Medical Science, 71(10), 1349-1355.
[2]	Shim, H. H., Jin, K. Y., Jae-Seoun, H., & Sung, J. J. (2004). Occurrence of the strA-strB streptomycin resistance genes in Pseudomonas species isolated from kiwifruit plants. Journal of Microbiology, 42(4), 365-368.
[3]	Kerrn, M. B., Klemmensen, T., Frimodt-Møller, N., & Espersen, F. (2002). Susceptibility of Danish Escherichia coli strains isolated from urinary tract infections and bacteraemia, and distribution of sul genes conferring sulphonamide resistance. Journal of Antimicrobial Chemotherapy, 50(4), 513-516.
[4]	Aminov, R. I., Chee-Sanford, J. C., Garrigues, N., Teferedegne, B., Krapac, I. J., White, B. A., & Mackie, R. I. (2002). Development, validation, and application of PCR primers for detection of tetracycline efflux genes of gram-negative bacteria. Applied and Environmental Microbiology, 68(4), 1786-1793.
[5]	Heuer, H., Kopmann, C., Binh, C. T., Top, E. M., & Smalla, K. (2009). Spreading antibiotic resistance through spread manure: characteristics of a novel plasmid type with low% G+ C content. Environmental microbiology, 11(4), 937-949.

## Sheet: Table S7
Table S7	Barcodes used with rpoB primers
Barcoded forward primer	Sequence	Barcoded reverse primer	Sequence
Ac696F_T01	TGTACTGTTTAYCGYAAAGAYTTGAAAGAAG	Ac1093R_T01	TAGATAGGGCMACACCYTTGTTMCCRTGA
Ac696F_T02	TGTGTTTTAYCGYAAAGAYTTGAAAGAAG	Ac1093R_T02	TCATCTAGGCMACACCYTTGTTMCCRTGA
Ac696F_T03	TATATGATTTAYCGYAAAGAYTTGAAAGAAG	Ac1093R_T03	TCGTCTCGGCMACACCYTTGTTMCCRTGA
Ac696F_T05	TGCTCTGTTTAYCGYAAAGAYTTGAAAGAAG	Ac1093R_T05	TGCACTCGGCMACACCYTTGTTMCCRTGA
Ac696F_T06	TAGATAGTTTAYCGYAAAGAYTTGAAAGAAG	Ac1093R_T06	TAGTGTCGGCMACACCYTTGTTMCCRTGA
Ac696F_T08	TACTATTTAYCGYAAAGAYTTGAAAGAAG	Ac1093R_T08	TCGATCAGGCMACACCYTTGTTMCCRTGA
Ac696F_T11	TCAGCATTTTAYCGYAAAGAYTTGAAAGAAG	Ac1093R_T11	TATGAGAGGCMACACCYTTGTTMCCRTGA
Ac696F_T13	TCTGCTATTTAYCGYAAAGAYTTGAAAGAAG	Ac1093R_T13	TCATGCAGGCMACACCYTTGTTMCCRTGA
Ac696F_T21	TGTATATTTTAYCGYAAAGAYTTGAAAGAAG	Ac1093R_T21	TACTAGGCMACACCYTTGTTMCCRTGA
Ac696F_T22	TATGTATTTAYCGYAAAGAYTTGAAAGAAG	Ac1093R_T22	TCGAGTCGGCMACACCYTTGTTMCCRTGA
Ac696F_T24	TGACATATTTAYCGYAAAGAYTTGAAAGAAG	Ac1093R_T24	TCTGAGGCMACACCYTTGTTMCCRTGA
Ac696F_T25	TGTAGTATTTAYCGYAAAGAYTTGAAAGAAG	Ac1093R_T25	TCGTGTAGGCMACACCYTTGTTMCCRTGA
Ac696F_T26	TACTCATTTTAYCGYAAAGAYTTGAAAGAAG	Ac1093R_T26	TGACTCAGGCMACACCYTTGTTMCCRTGA
Ac696F_T27	TCTCTCATTTAYCGYAAAGAYTTGAAAGAAG	Ac1093R_T27	TAGACTCGGCMACACCYTTGTTMCCRTGA
Ac696F_T28	TGTCAGATTTAYCGYAAAGAYTTGAAAGAAG	Ac1093R_T28	TATAGAGGGCMACACCYTTGTTMCCRTGA
Ac696F_T29	TATCGTGTTTAYCGYAAAGAYTTGAAAGAAG	Ac1093R_T29	TAGTCGGCMACACCYTTGTTMCCRTGA
Ac696F_T30	TCAGTTTTAYCGYAAAGAYTTGAAAGAAG	Ac1093R_T30	TGATGTCGGCMACACCYTTGTTMCCRTGA
Ac696F_T31	TAGACATTTAYCGYAAAGAYTTGAAAGAAG	Ac1093R_T31	TCAGATAGGCMACACCYTTGTTMCCRTGA
Ac696F_T32	TCTGACATTTAYCGYAAAGAYTTGAAAGAAG	Ac1093R_T32	TCAGCTCGGCMACACCYTTGTTMCCRTGA
Ac696F_T33	TCTGATTTAYCGYAAAGAYTTGAAAGAAG	Ac1093R_T33	TGTACTGGGCMACACCYTTGTTMCCRTGA
Ac696F_T36	TCGTATTTAYCGYAAAGAYTTGAAAGAAG	Ac1093R_T36	TAGAGTAGGCMACACCYTTGTTMCCRTGA
Ac696F_T39	TCACTGTTTAYCGYAAAGAYTTGAAAGAAG	Ac1093R_T39	TCTGTCGGCMACACCYTTGTTMCCRTGA
Ac696F_T44	TACACTATTTAYCGYAAAGAYTTGAAAGAAG	Ac1093R_T44	TAGTGAGGCMACACCYTTGTTMCCRTGA
Ac696F_T55	TGTCTATTTAYCGYAAAGAYTTGAAAGAAG	Ac1093R_T55	TGCTCGGCMACACCYTTGTTMCCRTGA
Ac696F_T57	TACTCGTTTAYCGYAAAGAYTTGAAAGAAG	Ac1093R_T57	TGTCGTCGGCMACACCYTTGTTMCCRTGA
Ac696F_T59	TATCTATTTTAYCGYAAAGAYTTGAAAGAAG	Ac1093R_T59	TAGCTCAGGCMACACCYTTGTTMCCRTGA
Ac696F_T60	TGACTATTTTAYCGYAAAGAYTTGAAAGAAG	Ac1093R_T60	TCGTAGGCMACACCYTTGTTMCCRTGA
Ac696F_T61	TCGCATGTTTAYCGYAAAGAYTTGAAAGAAG	Ac1093R_T61	TACTATCGGCMACACCYTTGTTMCCRTGA
Ac696F_T65	TCGTAGTTTTAYCGYAAAGAYTTGAAAGAAG	Ac1093R_T65	TCGAGAGGCMACACCYTTGTTMCCRTGA
Ac696F_T74	TACATCATTTAYCGYAAAGAYTTGAAAGAAG	Ac1093R_T74	TGTATCGGCMACACCYTTGTTMCCRTGA
Ac696F_T76	TAGAGTATTTAYCGYAAAGAYTTGAAAGAAG	Ac1093R_T76	TCAGTCAGGCMACACCYTTGTTMCCRTGA
Ac696F_T78	TCATGTGTTTAYCGYAAAGAYTTGAAAGAAG	Ac1093R_T78	TGTGTCAGGCMACACCYTTGTTMCCRTGA
Ac696F_T81	TATATTTTAYCGYAAAGAYTTGAAAGAAG	Ac1093R_T81	TACGCTCGGCMACACCYTTGTTMCCRTGA
Ac696F_T89	TCACACATTTAYCGYAAAGAYTTGAAAGAAG	Ac1093R_T89	TGTGCTCGGCMACACCYTTGTTMCCRTGA
Ac696F_T90	TCAGATATTTAYCGYAAAGAYTTGAAAGAAG	Ac1093R_T90	TATGATCGGCMACACCYTTGTTMCCRTGA
Ac696F_T91	TCACAGTTTTAYCGYAAAGAYTTGAAAGAAG	Ac1093R_T91	TCTGACAGGCMACACCYTTGTTMCCRTGA
Ac696F_T92	TGTGTGTTTTAYCGYAAAGAYTTGAAAGAAG	Ac1093R_T92	TCAGCGAGGCMACACCYTTGTTMCCRTGA

## Sheet: Table S8
Table S8	Information on rpoB sequences used as a reference for Acinetobacter species identification in rpoB-metabarcoding analysis. The fasta sequences are available in the Additional file 1 (use 'Sequenced strain' or 'Source sequence' for querying the sequence file).
Species/Taxon designation	LGB collection number*	Sequenced strain*	Source sequence	Current nomenclature
A. albensis	ANC 4874 T	ANC 4874 T	From FMBK01000004.1	Correct species name
A. amyesii	ANC 5579 T	ANC 5579 T	From JAMCOU010000026.1	Correct species name
A. apis	ANC 5114 T	ANC 5114 T < KACC 16906 T	From FZLN01000003.1	Correct species name
A. baretiae	ANC 7327 T	B10A T	From VTDM01000032.1	Correct species name
A. baumannii	NIPH 501 T	CIP 70.34 T	From CP046654.1	Correct species name
A. baylyi	NIPH 2312 R	ADP1 < BD4	From NC_005966.1	Correct species name
A. beijerinckii	NIPH 838 T	CIP 110307 T	From APQL01000006.1	Correct species name
A. bereziniae	NIPH 521 T	CIP 70.12 T	From APQG01000052.1	Correct species name
A. bohemicus	ANC 3994 T	ANC 3994 T	From APOH01000009.1	Correct species name
A. boissieri	ANC 4422 T	ANC 4422 T	From FMYL01000007.1	Correct species name
A. bouvetii	NIPH 2281 T	CIP 107468 T	From AP024595.1	Correct species name
A. brisouii	ANC 4119 T	ANC 4119 T	From APPR01000012.1	Correct species name
A. calcoaceticus	NIPH 2245 T	CIP 81.8 T	From APQI01000002.1	Correct species name
A. celticus	ANC 4603 T	ANC 4603 T	From MBDL01000001.1	Correct species name
A. colistiniresistens	NIPH 2036 T	NIPH 2036 T	From ATGK01000017.1	Correct species name
A. courvalinii	ANC 3623 T	ANC 3623 T	From APSA01000001.1	Correct species name
A. cumulans	ANC 5797 T	WCHAc060092 T	From CP035934.2	Correct species name
A. defluvii	ANC 5716 T	WCHA30 T	From CP029397.1	Correct species name
A. dispersus	ANC 4105 T	ANC 4105 T	From APRL01000014.1	Correct species name
A. entericus	-	BIT-DXN8 T	From JAPEQW010000011.1	Correct species name
A. equi	ANC 5469 T	114 T	From NZ_CP012808.1	Correct species name
A. faecalis	ANC 8047 T	YIM 103518 T	From WLYL01000004.1	Correct species name
A. gandensis	ANC 4275 T	ANC 4275 T	From LZDS01000001.1	Correct species name
A. geminorum	ANC 6677 T	J00019 T	From JABELE010000001.1	Correct species name
A. gerneri	NIPH 2282 T	CIP 107464 T	From APPN01000080.1	Correct species name
A. guerrae	ANC 7084 T	Ac 1271 T	From LXGN01000023.1	Correct species name
A. guillouiae	NIPH 522 T	CIP 63.46 T	From APOS01000024.1	Correct species name
A. gyllenbergii	NIPH 2150 T	CIP 110306 T	From ATGG01000025.1	Correct species name
A. haemolyticus	NIPH 510 T	CIP 64.3 T	From APQQ01000030.1	Correct species name
A. halotolerans	ANC 5766 T	JCM31009T	From SGIM01000005.1	Correct species name
A. harbinensis	ANC 4817 T	HITLi T	From JXBK01000001.1	Correct species name
A. higginsii	NIPH 1872 T	CIP 70.18 T	From APRN01000028.1	Correct species name
A. chengduensis	ANC 5900 T	WCHAc060005 T	From RCHC01000001.1	Correct species name
A. chinensis	ANC 5730 T	WCHAc010005 T	From CP032134.1	Correct species name
A. ihumii	ANC 8078 T	Marseille-P8049 T	From UYYC01000007.1	Correct species name
A. indicus	ANC 4215 T	ANC 4215 T < CCM 7832 T	From ATGH01000022.1	Correct species name
A. johnsonii	NIPH 518 T	CIP 64.6 T	From APON01000009.1	Correct species name
A. junii	NIPH 511 T	CIP 64.5 T	From APPX01000003.1	Correct species name
A. kanungonis	ANC 7160 T	PS-1 T	From JAACKC010000003.1	Correct species name
A. kookii	ANC 4667 T	ANC 4667 T < 11-0202 T	From FMYO01000008.1	Correct species name
A. lactucae	ANC 5637 T	NRRL B-41902 T	From LRPE01000023.1	Correct species name
A. lanii	ANC 8090 T	185 T	From CP049916.1	Correct species name
A. larvae	ANC 5767 T	BRTC-1 T	From CP016895.1	Correct species name
A. lwoffii	NIPH 512 T	NIPH 512 T	From AYHO01000005.1	Correct species name
A. modestus	NIPH 236 T	NIPH 236 T	From BMDV01000005.1	Correct species name
A. nectaris	ANC 4385 T	CIP 110549 T	From AYER01000007.1	Correct species name
A. nematophilus	ANC 8075 T	A-IN1 T	From JAPKMY010000005.1	Correct species name
A. nosocomialis	NIPH 2119 T	NIPH 2119 T	From APOP01000014.1	Correct species name
A. oleivorans	ANC 7560 T	DR1 T	From CP002080.1	Correct species name
A. parvus	NIPH 384 T	CIP 108168 T	From APOM01000007.1	Correct species name
A. pecorum	-	Sa1BUA6 T	From JACSPT010000001.1	Correct species name
A. piscicola	ANC 5842 T	LW15 T	From NIFO01000011.1	Correct species name
A. pittii	NIPH 519 T	CIP 70.29 T	From APQP01000014.1	Correct species name
A. pollinis	ANC 7326 T	SCC477 T	From VTDQ01000009.1	Correct species name
A. populi	ANC 5415 T	PBJ7 T	From NEXX01000001.1	Correct species name
A. portensis	ANC 7082 T	Ac 877 T	From LWRV01000100.1	Correct species name
A. pragensis	ANC 4149 T	ANC 4149 T	From LUAW01000023.1	Correct species name
A. proteolyticus	NIPH 809 T	NIPH 809 T	From APOI01000028.1	Correct species name
A. pseudolwoffii	ANC 5044 T	ANC 5044 T	From LBG-EMBL	Correct species name
A. puyangensis	ANC 4466 T	ANC 4466 T < BQ4-1 T	From OANT01000001.1	Correct species name
A. qingfengensis	ANC 4671 T	ANC 4671 T < 2BJ1 T	From MKKK01000012.1	Correct species name
A. radioresistens	NIPH 513 T	CIP 103788 T	From APQF01000007.1	Correct species name
A. rathckeae	ANC 7328 T	EC24 T	From VTDO01000014.1	Correct species name
A. rudis	NIPH 4129 T	CIP 110305 T	From ATGI01000041.1	Correct species name
A. sedimenti	ANC 8046 T	A3.8 T	From JAKUML010000002.1	Correct species name
A. seifertii	NIPH 973 T	NIPH 973 T	From APOO01000019.1	Correct species name
A. shaoyimingii	ANC 8091 T	323-1T	From CP049801.1	Correct species name
A. schindleri	NIPH 1034 T	CIP 107287 T	From APPQ01000019.1	Correct species name
A. sichuanensis	ANC 5790 T	WCHAc060041 T	From PYIX01000030.1	Correct species name
A. silvestris	ANC 4999 T	ANC 4999 T	From NEGB01000001.1	Correct species name
A. soli	NIPH 3874 T	CIP 110264 T	From APPU01000003.1	Correct species name
A. stercoris	ANC 7132 T	KPC-SM-21 T	From OOGT01000016.1	Correct species name
A. tandoii	NIPH 2284 T	CIP 107469 T	From AQFM01000044.1	Correct species name
A. terrae	ANC 4282 T	ANC 4282 T	From JABERI010000002.1	Correct species name
A. terrestris	ANC 4471 T	ANC 4471 T	From SJNZ01000035.1	Correct species name
A. thermotolerans	ANC 7454 T	ANC 7454 T	From NZ_CP156810	Correct species name
A. tibetensis	ANC 8092 T	Y-23 T	From CP098732.1	Correct species name
A. tjernbergiae	NIPH 2285 T	CIP 107465 T	From ARFU01000049.1	Correct species name
A. towneri	ANC 5045 R	ANC 5045	From LBG-EMBL	Correct species name
A. ursingii	NIPH 137 T	CIP 107286 T	From APQA01000001.1	Correct species name
A. variabilis	NIPH 2171 T	NIPH 2171 T	From APRS01000002.1	Correct species name
A. venetianus	NIPH 1925 T	CIP 110063 T	From APPO01000001.1	Correct species name
A. vivianii	NIPH 2168 T	NIPH 2168 T	From APRW01000008.1	Correct species name
A. wanghuae	ANC 8089 T	dk386 T	From CP045650.1	Correct species name
A. wuhouensis	ANC 5737 T	WCHA60 T	From CP031716	Correct species name
‘A. kyonggiensis’	ANC 5109 R	ANC 5109	From FNPK01000008.1	Only effectively published species name
‘A. marinus’	ANC 3699 R	ANC 3699	From FMYK01000005.1	Only effectively published species name
‘A. pullicarnis’	-	S23	From VCMZ01000001.1	Only effectively published species name
‘A. rongchengensis’	ANC 5989 R	WCHAc060115	From RAXT01000041.1	Only effectively published species name
‘A. tianfuensis’	ANC 5987 R	WCHAc060012	From RAXV01000016.1	Only effectively published species name
‘Candidatus A. pediculi’	-	P11RDC3	From MH230918	Provalidly published species name
Gen. sp. 15BJ	NIPH 1866 R	CIP 110321	From AQFL01000028.1	Genomospecies designation
Gen. sp. 6	NIPH 1853 R	CIP A165 R	From APOK01000007.1	Genomospecies designation
A. bohemicus-like A	ANC 4654 R	ANC 4654	From NEGL01000002.1	Taxon designation
A. calcoaceticus-like	ANC 4221 R	ANC 4221	From LBG-EMBL	Taxon designation
A. kookii-like	ANC 5037	ANC 5037	Unpublished	Taxon designation
A. modestus-like A	NIPH 284 R	NIPH 284	From APRI01000038.1	Taxon designation
A. proteolyticus-like	ANC 4943	ANC 4943	Unpublished	Taxon designation
A. schindleri-like A	ANC 4791 R	ANC 4791	Unpublished	Taxon designation
A. sp. 7382	ANC 7382 R	ANC 7382	Unpublished	Taxon designation
A. tandoii-like	ANC 5034	ANC 5034	Unpublished	Taxon designation
A. tandoii-like A	ANC 4178 R	ANC 4178	From SJOD01000002.1	Taxon designation
A. tandoii-like B	ANC 5367 R	ANC 5367	Unpublished	Taxon designation
A. tjernbergiae-like A	ANC 5361 R	ANC 5361	Unpublished	Taxon designation
A. towneri-like A	ANC 3630 R	ANC 3630	Unpublished	Taxon designation
A. towneri-like B	ANC 4415 R	ANC 4415	Unpublished	Taxon designation
A. towneri-like C	ANC 3799 R	ANC 3799	Unpublished	Taxon designation
A. towneri-like D	ANC 3894 R	ANC 3894	Unpublished	Taxon designation
Taxon 21	NIPH 3929 R	ANC 3929 R	From APRH01000025.1	Taxon designation
Taxon 22	NIPH 2100 R	NIPH 2100 R	From APSB01000001.1	Taxon designation
Taxon 24C	ANC 4779 R	ANC 4779	From SJNU01000012.1	Taxon designation
Taxon 24D	ANC 4862 R	ANC 4862	From SJXH01000028.1	Taxon designation
Taxon 24E	ANC 3781 R	ANC 3781	From SJOH01000026.1	Taxon designation
Taxon 25A	NIPH 3789 R	ANC 3789 R	From APOY01000008.1	Taxon designation
Taxon 25B	ANC 4633 R	ANC 4633 R	From LBG-EMBL	Taxon designation
Taxon 27	ANC 4169 R	ANC 4169	From NEGE01000025.1	Taxon designation
Taxon 32	ANC 4218 R	ANC 4218	From NEGD01000013.1	Taxon designation
Taxon 34	ANC 4470 R	ANC 4470	From NEGC01000015.1	Taxon designation
Taxon 37A	ANC 5424 R	ANC 5424	From LBG-EMBL contig4	Taxon designation
Taxon 37B	ANC 5732 R	WCHA34	From MBPQ02000001.1	Taxon designation
Taxon 38	ANC 3903 R	ANC 3903	From NEGA01000008.1	Taxon designation
Taxon 3813	ANC 3813	ANC 3813	From NEGK01000014.1	Taxon designation
Taxon 39	ANC 4204 R	ANC 4204	From NEFZ01000005.1	Taxon designation
Taxon 7209	ANC 7209 R	ANC 7209	Unpublished	Taxon designation
Taxon 7384	ANC 7384 R	ANC 7384	PX405908	Taxon designation
Taxon 7443	ANC 7443 R	ANC 7443	PX405915	Taxon designation
Taxon 7458	ANC 7458 R	ANC 7458	PX405920	Taxon designation
Taxon 7506	ANC 7506 R	ANC 7506	PX405923	Taxon designation
Taxon 7509	ANC 7509 R	ANC 7509	PX405935	Taxon designation
Taxon 7517	ANC 7517 R	ANC 7517	PX405944	Taxon designation
Taxon 7564	-	NCu2D-2	From CP015594.1	Taxon designation
Taxon 7576	ANC 7576 R	ANC 7576	PX405948	Taxon designation
Taxon 7579	ANC 7579 R	ANC 7579	PX405950	Taxon designation
Taxon 7593	ANC 7593 R	ANC 7593	PX405954	Taxon designation
Taxon 7655	ANC 7655 R	ANC 7655	PX405960	Taxon designation
Taxon 7947	ANC 7947 R	ANC 7947	PX405974	Taxon designation
Taxon XA	-	10FS3-1	From CP039143.1	Taxon designation
Taxon XD	-	Marseille-Q1623	From CADDWG010000001.1	Taxon designation
-	-	JUb89	From SLVJ01000001.1	Designation of taxonomically unique strain
-	ANC 4944	ANC 4944	Unpublished	Designation of taxonomically unique strain
-	ANC 4618	ANC 4618	Unpublished	Designation of taxonomically unique strain
-	ANC 5030	ANC 5030	Unpublished	Designation of taxonomically unique strain
-	ANC 4940	ANC 4940	Unpublished	Designation of taxonomically unique strain
-	ANC 5362	ANC 5362	Unpublished	Designation of taxonomically unique strain
-	NIPH 771	NIPH 771	Unpublished	Designation of taxonomically unique strain
-	NIPH 1073	NIPH 1073	Unpublished	Designation of taxonomically unique strain
-	NIPH 1454	NIPH 1454	Unpublished	Designation of taxonomically unique strain
-	NIPH 2314	NIPH 2314	Unpublished	Designation of taxonomically unique strain
-	-	S54	From JACVUI010000014.1	Designation of taxonomically unique strain
-	-	WU_MDCI_Axc73	From JAHPRO010000009.1	Designation of taxonomically unique strain
-	-	ME22 5	From JAKLTL010000005.1	Designation of taxonomically unique strain
-	-	A7.4	From JAKVIM010000022.1	Designation of taxonomically unique strain
-	-	HY1485	From JANKZG010000002.1	Designation of taxonomically unique strain
-	ANC 4900	A47	From JSUS01000044.1	Designation of taxonomically unique strain
-	-	CFCC 10889	From LQXQ01000070.1	Designation of taxonomically unique strain
-	ANC 5054	ANC 5054	From NEGG01000001.1	Designation of taxonomically unique strain
-	ANC 4558	ANC 4558	From NEGH01000008.1	Designation of taxonomically unique strain
-	ANC 4648	ANC 4648	From NEGI01000007.1	Designation of taxonomically unique strain
-	ANC 3832	ANC 3832	From NEGJ01000001.1	Designation of taxonomically unique strain
-	ANC 7581	ANC 7581	Unpublished	Designation of taxonomically unique strain
-	-	P8-3-8	From AFIE01000017.1	Designation of taxonomically unique strain
-	-	Marseille-Q1618	From CADDWJ010000002.1	Designation of taxonomically unique strain
-	-	TGL-Y2	From CP015110.1	Designation of taxonomically unique strain
-	-	LoGeW2-3	From CP024011.1	Designation of taxonomically unique strain
-	-	ASP199	From CP062182.1	Designation of taxonomically unique strain
-	ANC 6283	C26G	From CP098479	Designation of taxonomically unique strain
-	ANC 6282	C32I	From CP098480.1	Designation of taxonomically unique strain
-	-	GSS19	From CP117520.1	Designation of taxonomically unique strain
-	ANC 3055	ANC 3055	Unpublished	Designation of taxonomically unique strain
-	ANC 4942	ANC 4942	Unpublished	Designation of taxonomically unique strain
-	-	MB5	From POVU01000011.1	Designation of taxonomically unique strain
-	ANC 7552	ANC 7552	Unpublished	Designation of taxonomically unique strain
-	ANC 7456	ANC 7456	Unpublished	Designation of taxonomically unique strain
-	ANC 7508	ANC 7508	Unpublished	Designation of taxonomically unique strain
-	ANC 7944	ANC 7944	Unpublished	Designation of taxonomically unique strain
-	ANC 4946	ANC 4946	Unpublished	Designation of taxonomically unique strain
-	ANC 3054	ANC 3054	Unpublished	Designation of taxonomically unique strain
-	NIPH 2699	NIPH 2699	Unpublished	Designation of taxonomically unique strain
*Abbreviations: T, type strain; R, reference strain of a new tentative taxon.

## Sheet: Table S9
Table S9	Summary of Illumina NextSeq and Oxford Nanopore Promethion shotgun sequencing of Acinetobacter enrichment DNA
	Illumina NextSeq				Oxford Nanopore Promethion, filtered at average read quality Q>15 and length >1000
Sample	Average lenght (bp)	Total read count	GC content (%)	Share of Acinetobacter reads (%)	Number of sequences	Sum length (bp)	Minimal length (bp)	Average length (bp)	Maximal length (bp)	N50	Q20 (%)	Q30 (%)	GC content (%)	Estimated share of Acinetobacter bases (%)
F01_floor	150	40238644	50	18.3377	1939488	15224262064	1000	7849.6	72172	9873	91.98	84.01	49.56	2.79178e+09
F02_floor	150	43426026	49	77.51	474195	5082994236	1000	10719.2	59514	13612	92.92	85.86	48.6	3.93983e+09
F03_floor	150	37272582	45	77.5062	427856	4533695402	1000	10596.3	60336	14030	92.91	85.96	44.26	3.5139e+09
F04_floor	150	37249808	47	82.7573	969091	10466960920	1000	10800.8	75013	14332	93.04	86.31	46.99	8.66217e+09
F05_floor	150	48253120	47	76.9301	765744	5901205518	1000	7706.5	52578	10017	92.46	85.03	47.22	4.53981e+09
F06_floor	150	41775272	49	65.3602	512586	5182191359	1000	10109.9	91015	13452	92.74	85.5	49.04	3.38709e+09
F07_floor	150	37042646	47	60.8337	884582	5388081309	1000	6091.1	77416	10008	92.29	84.71	46.73	3.27777e+09
F08_floor	150	37891142	50	30.5732	1432201	11847057133	1000	8271.9	53451	9885	91.78	83.49	49.64	3.62202e+09
F09_floor	150	18101534	45	94.0352	279743	3476662128	1000	12428.1	72376	15671	92.9	85.99	46.46	3.26928e+09
F10_floor	150	38266126	46	90.3208	355057	3700423856	1000	10422.1	83770	14192	92.81	85.83	45.98	3.34225e+09
F11_floor	150	37509968	47	91.2707	189660	2425836998	1000	12790.5	88788	17880	92.91	85.95	46.54	2.21408e+09
F12_floor	150	45894626	47	71.6022	291678	3326024699	1000	11403.1	76558	14996	92.24	84.72	49.08	2.38151e+09
F13_floor	150	40763698	46	81.1505	398646	4578298622	1000	11484.6	75448	14800	92.81	85.72	46.04	3.71531e+09
F14_floor	150	39036072	51	63.7401	225402	2892265962	1000	12831.6	59892	17333	92.72	85.47	51.04	1.84353e+09
F15_floor	150	41118680	50	26.09	1486909	13646752774	1000	9177.9	60610	11235	92.21	84.53	50.17	3.56044e+09
F16_floor	150	43959268	47	75.4332	2450521	14124498373	1000	5763.9	69348	7703	92.95	86.12	47.44	1.06546e+10
F17_floor	150	48880900	50	4.34191	2410522	20059245646	1000	8321.5	83139	10728	92.02	84.06	49.56	8.70955e+08
F18_floor	150	40403750	44	77.6255	385639	4236072076	1000	10984.6	68483	14509	92.78	85.77	43.63	3.28827e+09
F19_floor	150	38554372	46	69.145	369230	3722876136	1000	10082.8	59544	12985	92.25	84.69	46.17	2.57418e+09
F20_floor	150	44240798	47	63.8387	593538	4680458207	1000	7885.7	83333	12428	91.73	83.17	47.49	2.98794e+09
F21_floor	150	40762206	47	84.0706	272281	2890288751	1000	10615.1	82380	15001	92.31	84.79	47.27	2.42988e+09
F22_floor	150	41849374	46	89.8792	282566	3291045143	1000	11647	69080	14923	92.5	85.13	46.4	2.95797e+09
F23_floor	150	38716620	48	65.4059	2057357	6497304553	1000	3158.1	59145	3868	92.26	84.6	49.14	4.24962e+09
F24_floor	150	38853678	50	57.027	578155	5649782514	1000	9772.1	67642	12000	91.86	83.95	49.92	3.2219e+09
F25_floor	150	44812768	45	94.5063	288821	3004775053	1000	10403.6	67476	13541	92.4	85.01	45.78	2.8397e+09
F26_floor	150	36800286	48	64.0292	353641	4273946432	1000	12085.6	58845	16368	92.39	84.97	47.39	2.73657e+09
F27_floor	150	35614914	48	71.1161	254295	2456052604	1000	9658.3	87313	15126	91.96	83.87	48.03	1.74665e+09
F28_floor	150	37856306	47	85.0317	306001	3350079903	1000	10947.9	60839	14596	92.56	85.24	46.61	2.84863e+09

## Sheet: Table S10
Table S10	Statistics on Acinetobacter-assigned contigs from enrichment cultures. Assembly statistics was calculated with metaquast v5.2.0 [1]. 'Assembly strategy' indicates Flye [2] and Plassembler [3] settings yielding optimal assebmlies as folows: strat_1: flye: genome mode/plassembler: hybrid mode, spades-assembled; strat_2: flye: meta mode/plassembler: hybrid mode, spades-assembled [4]; strat_3: flye: …
Sample	F01_floor	F02_floor	F03_floor	F04_floor	F05_floor	F06_floor	F07_floor	F08_floor	F09_floor	F10_floor	F11_floor	F12_floor	F13_floor	F14_floor	F15_floor	F16_floor	F17_floor	F18_floor	F19_floor	F20_floor	F21_floor	F22_floor	F23_floor	F24_floor	F25_floor	F26_floor	F27_floor	F28_floor
Total length	12860788	9525369	17928721	9788345	4110742	4331742	12003408	4393587	7219494	11487789	13349486	7453722	10771910	5602260	7874136	23490977	3954950	20493560	11110898	4269057	10428220	22676775	4715142	12879053	5645029	4912378	13194587	11407952
# contigs (>= 0 bp)	131	647	913	136	670	127	598	771	138	382	139	740	846	18	13	633	22	100	834	412	484	222	186	303	328	24	676	757
# contigs (>= 1000 bp)	131	647	913	136	670	127	598	771	138	382	139	740	846	18	13	633	22	100	834	412	484	222	186	303	328	24	676	757
# contigs (>= 5000 bp)	64	202	291	60	214	79	192	224	83	125	67	180	218	11	13	629	16	69	260	79	145	216	89	116	111	18	279	246
# contigs (>= 10000 bp)	36	121	180	42	118	61	110	94	61	78	48	99	122	11	13	616	13	54	157	29	100	208	54	75	66	15	174	154
# contigs (>= 25000 bp)	23	46	101	25	23	37	56	26	38	43	32	34	46	11	13	305	10	38	63	9	40	170	37	40	22	14	73	69
# contigs (>= 50000 bp)	21	24	69	18	5	22	29	6	23	30	22	6	24	10	10	62	8	34	29	2	25	86	21	25	6	10	31	27
Total length (>= 1000 bp)	12860788	9525369	17928721	9788345	4110742	4331742	12003408	4393587	7219494	11487789	13349486	7453722	10771910	5602260	7874136	23490977	3954950	20493560	11110898	4269057	10428220	22676775	4715142	12879053	5645029	4912378	13194587	11407952
Total length (>= 5000 bp)	12712998	8616640	16569249	9624513	3101474	4217462	11193356	3200222	7103041	10922848	13186053	6334361	9568613	5585490	7874136	23476850	3940921	20411475	9925217	3614249	9742973	22649728	4500813	12455582	5197329	4902079	12379607	10305972
Total length (>= 10000 bp)	12513138	8034266	15804124	9505894	2379472	4072336	10632752	2264040	6951471	10592528	13050145	5748388	8891323	5585490	7874136	23371982	3920498	20303413	9200878	3257320	9417387	22590970	4246736	12160705	4885930	4881862	11629201	9646299
Total length (>= 25000 bp)	12303058	6814100	14575145	9236984	957316	3666468	9798831	1196981	6586419	10050425	12766567	4733023	7721581	5585490	7874136	17470023	3875908	20051362	7749837	2928366	8450888	21916584	3978717	11614559	4163227	4867135	9936280	8296989
Total length (>= 50000 bp)	12242475	6055661	13413531	8985976	335976	3145823	8871667	544940	6041981	9646475	12423215	3771628	7008809	5558108	7739874	9334019	3813290	19922936	6644720	2714627	7927836	18805840	3410880	11124574	3619735	4740908	8565641	6843336
Largest contig	3232992	1287031	1136800	3417230	96057	507719	1286590	174489	1037665	1771697	2170398	2753399	1078775	1662767	3049911	1037479	743106	2758947	829902	1659146	1538266	3220866	683919	1642520	1500994	1101325	3221969	1205508
GC (%)	43.53	40.78	42.24	42.9	39.41	45.18	42.4	39.06	44.14	41.64	43.6	42.84	42.53	43.54	42.96	43.6	44.13	40.64	41.48	42.06	42.86	42.8	45.16	42.81	44.47	44.33	41.79	42.89
N50	815290	168109	191456	1696279	12128	104816	484815	10563	811427	616059	1105669	50958	198640	1636993	997324	38179	675192	930487	114891	1055481	403892	591457	135149	658656	616777	1032700	149391	118941
N90	225697	5336	7260	65775	2201	16837	7944	2099	30212	15859	87152	2816	4148	202207	625668	19257	194074	291681	4583	2589	10685	38793	10104	25302	6705	165448	7993	5355
L50	4	6	19	2	89	10	7	88	4	6	5	6	9	2	2	119	3	8	15	2	6	12	8	6	3	3	6	14
L90	16	194	220	16	392	49	130	466	35	58	16	279	246	6	7	473	6	22	276	144	97	124	54	40	90	7	202	239
# N's per 100 kbp	0	0	0	0	0	0	0	0	0	0	0	0	0	0	0	0	0	0	0	0	0	0	0	0	0	0	0	0
Assembly strategy	strat_1	strat_2	strat_1	strat_2	strat_1	strat_2	strat_1	strat_2	strat_2	strat_2	strat_2	strat_1	strat_1	strat_1	strat_3	strat_4	strat_1	strat_3	strat_2	strat_1	strat_1	strat_4	strat_2	strat_1	strat_1	strat_1	strat_1	strat_2
	References
[1]	Mikheenko, A., Saveliev, V., & Gurevich, A. (2016). MetaQUAST: evaluation of metagenome assemblies. Bioinformatics, 32(7), 1088-1090
[2]	Kolmogorov, M., Bickhart, D.M., Behsaz, B., Gurevich, A., Rayko, M., Shin, S.B., Kuhn, K., Yuan, J., Polevikov, E., Smith, T.P.L., Pevzner, P.A., 2020. metaFlye: scalable long-read metagenome assembly using repeat graphs. Nat. Methods 17, 1103–1110.
[3]	Bouras, G., Sheppard, A.E., Mallawaarachchi, V., Vreugde, S., 2023. Plassembler: an automated bacterial plasmid assembly tool. Bioinformatics 39 (7), btad409.
[4]	Antipov, D., Korobeynikov, A., McLean, J. S., & Pevzner, P. A. (2016). hybridSPAdes: an algorithm for hybrid assembly of short and long reads. Bioinformatics, 32(7), 1009-1015.
[5]	Koren, S., Walenz, B. P., Berlin, K., Miller, J. R., Bergman, N. H., & Phillippy, A. M. (2017). Canu: scalable and accurate long-read assembly via adaptive k-mer weighting and repeat separation. Genome Research, 27(5), 722-736. doi: 10.1101/gr.215087.116

[truncated: 5 more sheets: Table S11, Table S12, Table S13, Table S14, Table S15]
